# Supplementary material for: Maternal and perinatal outcomes by planned place of birth in Australia 2000 – 2012: a linked population data study
Source: PubMed Central journal article supplement — BMJ Open. 2019 Oct 29;9(10):e029192. doi: 10.1136/bmjopen-2019-029192 (PMC6830673; doi:10.1136/bmjopen-2019-029192), 2019-10-29
Supplement: bmjopen-2019-029192.draft_revisions.pdf [file bmjopen-2019-029192.draft_revisions.pdf]

# BMJ Open

BMJ Open is committed to open peer review. As part of this commitment we make the peer review history of every article we publish publicly available.

When an article is published we post the peer reviewers' comments and the authors' responses online. We also post the versions of the paper that were used during peer review. These are the versions that the peer review comments apply to.

The versions of the paper that follow are the versions that were submitted during the peer review process. They are not the versions of record or the final published versions. They should not be cited or distributed as the published version of this manuscript.

BMJ Open is an open access journal and the full, final, typeset and author-corrected version of record of the manuscript is available on our site with no access controls, subscription charges or pay-per-view fees (<http://bmjopen.bmj.com>).

If you have any questions on BMJ Open's open peer review process please email [info.bmjopen@bmj.com](mailto:info.bmjopen@bmj.com)

# BMJ Open

## Outcomes by planned place of birth in Australia 2000 – 2012: A linked population data study

|                               |                                                                                                                                                                                                                                                                                                                                                                                                                                                                                                                                                                                                                                                                                                                                                                                                                                                                                                                                                                                                                                                                                                     |
|-------------------------------|-----------------------------------------------------------------------------------------------------------------------------------------------------------------------------------------------------------------------------------------------------------------------------------------------------------------------------------------------------------------------------------------------------------------------------------------------------------------------------------------------------------------------------------------------------------------------------------------------------------------------------------------------------------------------------------------------------------------------------------------------------------------------------------------------------------------------------------------------------------------------------------------------------------------------------------------------------------------------------------------------------------------------------------------------------------------------------------------------------|
| Journal:                      | <i>BMJ Open</i>                                                                                                                                                                                                                                                                                                                                                                                                                                                                                                                                                                                                                                                                                                                                                                                                                                                                                                                                                                                                                                                                                     |
| Manuscript ID                 | bmjopen-2019-029192                                                                                                                                                                                                                                                                                                                                                                                                                                                                                                                                                                                                                                                                                                                                                                                                                                                                                                                                                                                                                                                                                 |
| Article Type:                 | Research                                                                                                                                                                                                                                                                                                                                                                                                                                                                                                                                                                                                                                                                                                                                                                                                                                                                                                                                                                                                                                                                                            |
| Date Submitted by the Author: | 22-Mar-2019                                                                                                                                                                                                                                                                                                                                                                                                                                                                                                                                                                                                                                                                                                                                                                                                                                                                                                                                                                                                                                                                                         |
| Complete List of Authors:     | Homer, Caroline; UTS, Faculty of Health; Burnet Institute, Maternal and Child Health Program<br>Cheah, Seong; University of Technology Sydney Faculty of Health, Centre for Midwifery, Child and Family Health<br>Rossiter, Christine ; University of Technology Sydney,<br>Dahlen, Hannah; University of Western Sydney, School of Nursing and Midwifery<br>Ellwood, David; Griffith University, School of Medicine<br>Foureur, Maralyn; UTS, Health<br>Forster, Della; La Trobe University, Judith Lumley Centre; Royal Women's Hospital, Maternity Services<br>McLachlan, HL; La Trobe University, Judith Lumley Centre; La Trobe University, School of Nursing and Midwifery<br>Oats, Jeremy; University of Melbourne Institute, Melbourne School of Population and Global Health<br>Sibbritt, David; University of Technology Sydney, Faculty of Health<br>Thornton , Charlene ; Flinders University Faculty of Medicine Nursing and Health Sciences, College of Nursing and Health Sciences<br>Scarf, Vanessa; University of Technology Sydney, Centre for Midwifery, Child and Family Health |
| Keywords:                     | Maternal medicine < OBSTETRICS, EPIDEMIOLOGY, PERINATOLOGY                                                                                                                                                                                                                                                                                                                                                                                                                                                                                                                                                                                                                                                                                                                                                                                                                                                                                                                                                                                                                                          |
|                               |                                                                                                                                                                                                                                                                                                                                                                                                                                                                                                                                                                                                                                                                                                                                                                                                                                                                                                                                                                                                                                                                                                     |

SCHOLARONE™  
Manuscripts

1  
2  
3  
4 1 **Outcomes by planned place of birth in Australia 2000 – 2012: A**  
5  
6 2 **linked population data study**  
7  
8

9 3  
10 4 Homer, Caroline SE  
11 5 Centre for Midwifery, Child and Family Health, Faculty of Health, University of Technology  
12 6 Sydney, Sydney, Australia  
13 7 Maternal and Child Health Program, Burnet Institute, Melbourne, Australia  
14 8

15 8  
16 9 Cheah, Seong  
17 10 Centre for Midwifery, Child and Family Health, Faculty of Health, University of Technology  
18 11 Sydney, Sydney, Australia  
19 12

20 12  
21 13 Rossiter, Christine  
22 14 Centre for Midwifery, Child and Family Health, Faculty of Health, University of Technology  
23 15 Sydney, Australia  
24 16

25 16  
26 17 Dahlen, Hannah G  
27 18 School of Nursing and Midwifery, University of Western Sydney, Sydney, Australia  
28 19

29 19  
30 20 Ellwood, David  
31 21 School of Medicine, Griffith University, Queensland, Australia  
32 22

33 23 Foureur, Maralyn  
34 24 Centre for Midwifery, Child and Family Health, Faculty of Health, University of Technology  
35 25 Sydney, Australia  
36 26

37 26  
38 27 Forster, Della  
39 28 Judith Lumley Centre; Royal Women's Hospital, Maternity Services, La Trobe University,  
40 29 Melbourne, Australia  
41 30

42 30  
43 31 McLachlan, Helen L  
44 32 Judith Lumley Centre; Royal Women's Hospital, Maternity Services, La Trobe University,  
45 33 Melbourne, Australia  
46 34

47 34  
48 35 Oats, Jeremy  
49 36 Melbourne School of Population and Global Health, University of Melbourne, Melbourne,  
50 37 Australia  
51 38

52 38  
53 39 Sibbritt, David  
54 40 Faculty of Health, University of Technology Sydney, Australia  
55 41

56 41  
57 42 Thornton, Charlene  
58 43 Faculty of Medicine Nursing and Health Sciences, College of Nursing and Health Sciences  
59 44 Flinders University, Adelaide, Australia  
60

1  
2  
3 45  
4 46 Scarf, Vanessa  
5 47 Centre for Midwifery, Child and Family Health, Faculty of Health, University of Technology  
6 48 Sydney, Australia  
7  
8  
9 49

10 50 Corresponding author  
11 51 Professor Caroline Homer AO  
12 52 Burnet Institute  
13 53 85 Commercial Road, Melbourne, 3000 Victoria  
14 54 T +613 8506 2454  
15 55 M +61 418 466 974  
16 56 E [caroline.homer@burnet.edu.au](mailto:caroline.homer@burnet.edu.au)  
17  
18 57  
19  
20

21 58  
22 59 Keywords: Maternal medicine, obstetrics, epidemiology, perinatology  
23  
24 60

25 61 Word count - excluding title page, references, figures: 5185  
26 62  
27 63  
28  
29  
30  
31  
32  
33  
34  
35  
36  
37  
38  
39  
40  
41  
42  
43  
44  
45  
46  
47  
48  
49  
50  
51  
52  
53  
54  
55  
56  
57  
58  
59  
60

1  
2  
3 64 **ABSTRACT**  
4  
5

6 65 **Objective** – To compare perinatal and maternal outcomes for Australian women with  
7  
8 66 uncomplicated pregnancies according to planned place of birth, that is, in hospital labour  
9  
10 67 wards, birth centres or at home.

11  
12 68 **Design** – A population-based retrospective design, linking and analysing routinely collected  
13  
14 69 electronic data about women and their infants. Analysis comprised chi-square tests and  
15  
16 70 binary logistic regression for categorical data, yielding adjusted odds ratios. Continuous data  
17  
18 71 were analysed using ANOVA.

19  
20 72 **Setting** – All eight Australian states and territories.

21  
22  
23 73 **Participants** – Women with low-risk pregnancies who gave birth between 2000 and 2012 to  
24  
25 74 a singleton baby in cephalic presentation at between 37 and 41 completed weeks' gestation.  
26  
27 75 Of the 1 251 420 births, 1 171 703 (93.6%) were planned in hospital labour wards or birth  
28  
29 76 suites, 71 505 (5.7%) in birth centres and 8212 (0.7%) at home.

30  
31 77 **Main outcome measures** – Mode of birth, interventions and procedures during labour and  
32  
33 78 birth, maternal complications, admission to special care/high dependency or intensive care  
34  
35 79 units (mother or infant) and perinatal mortality (intrapartum stillbirth and neonatal death).

36  
37 80 **Results** – Compared with planned hospital births, the odds of normal labour and birth were  
38  
39 81 over twice as high in planned birth centre births (AOR 2.72; 99% CI 2.63-2.81) and nearly six  
40  
41 82 times as high in planned home births (AOR 5.91; 99% CI 5.15-6.78). There were no  
42  
43 83 statistically significant differences in the proportion of intrapartum stillbirths, early or late  
44  
45 84 neonatal deaths between the three planned places of birth.

46  
47 85 **Conclusions** – This is the first Australia-wide study to examine outcomes by planned place of  
48  
49 86 birth. It demonstrates that for low-risk healthy women in Australia, planned births in birth  
50  
51 87 centres or at home are associated with positive maternal outcomes. There were no  
52  
53 88 significant differences in the perinatal mortality rate, although the absolute numbers of  
54  
55 89 deaths were very small.  
56  
57  
58  
59  
60

## 91 ARTICLE SUMMARY

### 92 Strengths and limitations of this study

- 93 • This retrospective study reveals the first Australia-wide evidence on the relative  
94 safety of planned birth in hospital, a birth centre and at home.
- 95 • It analyses linked data on the outcomes for low-risk women and their infants in all  
96 eight Australian states and territories.
- 97 • Careful data screening eliminated most causes of obstetric complexity, resulting in  
98 three cohorts with equivalent levels of risk.
- 99 • Inconsistency between state-based datasets limited the number of confounding  
100 variables available for analysis.
- 101 • Insufficient data on changes in planned birth place prior to labour hampered  
102 identification of intrapartum transfers and analysis of the relationship between  
103 intended and actual place of birth.

### 104 Funding statement

105 This work was supported by the National Health and Medical Research Council Australia,  
106 Grant ID 1022422 (2012-2017).

### 107 Competing interest statement

108 We have read and understood *BMJ* policy on declaration of interests and declare that we  
109 have no competing interests.

### 110 Acknowledgements

111 We acknowledge and thank the data custodians in each state and territory and the data  
112 linkage units who assisted with data collection at each jurisdictional level.

### 113 Ethics approval

114 The study received initial ethical approval from the lead university's Human Research Ethics  
115 Committee (HREC) (university reference number: 2012000167) and from data custodians in  
116 each state and territory. The details are provided in a Supplementary File.

### 117 Author contribution

1  
2  
3 118 CSEH as the lead investigator was responsible for the overall leadership of the study  
4  
5 119 including the initial conception and design, grant application, ethical approval processes,  
6  
7 120 leading the project, drafting the manuscript and finalising the paper.  
8

9  
10 121 SLC was the data analyst responsible for merging the datasets from each jurisdiction,  
11  
12 122 refining the datasets, developing the analysis codes and processes and conducting the  
13  
14 123 statistical analysis and has provided final approval of this version.  
15

16 124 CR worked with the data analyst to support data analysis and interpretation as well as  
17  
18 125 taking a key role in supporting the drafting of the manuscript and has provided final  
19  
20 126 approval of this version.  
21

22 127 HGD was involved in the initial design of the study, played a key role in developing the study  
23  
24 128 questions and data analytic processes, was involved in drafting the work and/or revising it  
25  
26 129 critically for important intellectual content and has provided final approval of this version.  
27

28 130 DAE was involved in the initial design of the study, played a key role in developing the study  
29  
30 131 questions and providing expert review, was involved in drafting the work and/or revising it  
31  
32 132 critically for important intellectual content and has provided final approval of this version.  
33

34  
35 133 MJF was involved in the initial design of the study, played a key role in developing the study  
36  
37 134 questions and providing expert review, was involved in drafting the work and/or revising it  
38  
39 135 critically for important intellectual content and has provided final approval of this version.  
40

41 136 DF was involved in the initial design of the study, played a key role in developing the study  
42  
43 137 questions and providing expert review, was involved in drafting the work and/or revising it  
44  
45 138 critically for important intellectual content and has provided final approval of this version.  
46

47 139 HMc was involved in the initial design of the study, played a key role in developing the study  
48  
49 140 questions and providing expert review, was involved in drafting the work and/or revising it  
50  
51 141 critically for important intellectual content and has provided final approval of this version.  
52

53  
54 142 JO was involved in the initial design of the study, played a key role in developing the study  
55  
56 143 questions and providing expert review, was involved in drafting the work and/or revising it  
57  
58 144 critically for important intellectual content and has provided final approval of this version.  
59  
60

1  
2  
3 145 DS was involved in the initial design of the study, played a key role in developing the study  
4  
5 146 questions and analytic processes and providing expert statistical planning and review, was  
6  
7 147 involved in drafting the work and/or revising it critically for important intellectual content  
8  
9 148 and has provided final approval of this version.

10  
11 149 CT played a key role in developing the study questions and analytic plan, assisted with  
12  
13 150 planning the data set merging and cleaning of the data and providing expert epidemiological  
14  
15 151 review, was involved in drafting the work and/or revising it critically for important  
16  
17 152 intellectual content and has provided final approval of this version.

18  
19 153 VS was the project coordinator responsible for the ethical approval processes, took a key  
20  
21 154 role in coordinating the acquisition of the data from the different states and territories as  
22  
23 155 well as a lead role in planning and undertaking the analysis and interpretation, was involved  
24  
25 156 in drafting the work and/or revising it critically for important intellectual content and has  
26  
27 157 provided final approval of this version.

### 28 29 158 **Reporting statement**

30  
31  
32 159 The STROBE Statement for a cohort study is included as a Supplementary File.

### 33 34 160 **Consent**

35  
36  
37 161 Individual consent by participants was deemed to not be required due to the population-  
38  
39 162 based de-identified form of the data released to the researchers.

### 40 41 163 **Data sharing statement**

42  
43  
44 164 The data that support the findings of this study are not available. It was a condition of the  
45  
46 165 agreement between the data linkage units and the researchers that the dataset remain  
47  
48 166 confidential. We are not permitted to make any part of the linked data available to any  
49  
50 167 party outside those named on the research team who have been granted access.

51  
52  
53 168



## 169 INTRODUCTION

170 In Australia, most births occur in hospitals (97.5% in 2015), with some variation by the  
171 different states and territories (for example, 91% in the Australian Capital Territory to 99%  
172 in Victoria).<sup>1</sup> Women with uncomplicated pregnancies planning hospital births in the public  
173 health system receive antenatal care from hospital-based midwives and doctors, sometimes  
174 within continuity of care models, and often in partnership with local general practitioners.  
175 Hospital midwives attend their labour and birth, with medical involvement as required or in  
176 line with local protocols. In the private health system, women receive antenatal care from  
177 private obstetricians or midwives employed by obstetricians. Hospital midwives attend their  
178 labour and birth; the obstetrician attends the birth.<sup>2,3</sup> There are some differences across  
179 Australia in the way care is provided, the local guidelines and the choices available to  
180 women.

181 While most births take place in hospital labour wards or birth suites, a small proportion  
182 (1.8% nationally) take place in midwife-run birth centres.<sup>1</sup> Australian birth centres are  
183 typically co-located with hospitals (alongside midwifery units) although a small number of  
184 stand-alone birth centres exist.<sup>4</sup> Less than 0.3% of Australian births take place at home,  
185 ranging from 0.1% of births in New South Wales to 0.6% in the Northern Territory.<sup>1,5</sup> Most  
186 planned home births are attended by midwives working in private practice, some of whom  
187 also attend women in birth centres and hospitals. A small number of hospitals and birth  
188 centres offer home births through the public health system.<sup>6</sup> An evaluation of the outcomes  
189 of publicly funded models showed that the rate of stillbirth and early neonatal mortality was  
190 low, at 1.7 per 1000 births. However, the sample size did not have sufficient power to  
191 generate a conclusion about safety.<sup>7</sup>

192 We recently conducted a systematic review to examine maternal and perinatal outcomes  
193 associated with planned place of birth for women with low-risk pregnancies in high-income  
194 countries.<sup>8</sup> The 28 studies from 13 countries investigated several outcomes using mostly  
195 observational methods. Meta-analysis of data from high-quality studies where intended  
196 birth place was identified at labour onset demonstrated that women who planned hospital  
197 births had significantly higher rates of perineal trauma and instrumental/caesarean birth  
198 than those who planned other birth places. Overall, there was no significant difference in

1  
2  
3 199 the odds of intrapartum stillbirth according to place of birth (compared with planned  
4  
5 200 hospital births, planned homebirth: OR=0.94; 95% CI: 0.76-1.17; planned birth centre  
6  
7 201 OR=0.66; 95% CI: 0.32-1.34) or in early neonatal deaths (planned home birth OR=1.00; 95%  
8  
9 202 CI: 0.78-1.27; planned birth centre 1.08; 95% CI: 0.42-2.78).

10  
11 203 Previous Australian state-based studies into place of birth identified differing outcomes. For  
12  
13 204 example, a study of births in NSW (accounting for around 30.9% of Australian births)<sup>9</sup> found  
14  
15 205 that women without pregnancy complications who planned a home or birth centre birth  
16  
17 206 had significantly higher proportions of normal birth than those planning hospital births  
18  
19 207 (home 97.4% vs birth centre 86.0% vs hospital 73.9%). The study detected no significant  
20  
21 208 difference in neonatal mortality although the overall sample size (n= 258 161, including only  
22  
23 209 742 planned home births), was insufficient to test reliably for differences by birth place for  
24  
25 210 these relatively rare outcomes. Another study in South Australia (SA) (297 192 planned  
26  
27 211 hospital births and 1141 [0.38%] planned home births) found lower intervention rates and  
28  
29 212 equivalent perinatal death rates in home births compared to hospital births. However, the  
30  
31 213 odds of an intrapartum fetal death were significantly higher among planned home births  
32  
33 214 (two deaths in the planned home birth group; AOR 7.42; 95% CI: 1.53–35.87). This study  
34  
35 215 also included some women with obstetric risk factors in the home birth group including  
36  
37 216 twins.<sup>10</sup> Large-scale studies in other countries have used larger data sets, generating greater  
38  
39 217 statistical power<sup>11-14</sup> and mostly showing similar perinatal outcomes between births planned  
40  
41 218 at home and in hospitals (and birth centres where these exist) with some differences for  
42  
43 219 nulliparous women.

44 220 Data from Australian birth centres indicate lower rates of maternal morbidity,<sup>15</sup>  
45  
46 221 intervention, preterm birth and low birthweight compared with hospital births for women  
47  
48 222 with similar low-risk profiles.<sup>16</sup> One study identified no significant differences by birth place  
49  
50 223 in perinatal mortality<sup>16</sup> and another reported lower perinatal mortality in birth centre births,  
51  
52 224 although based on actual rather than intended birth place.<sup>17</sup> A smaller hospital-based study  
53  
54 225 found no significant difference in caesarean section rates between birth centre and labour  
55  
56 226 ward for women with low-risk pregnancies.<sup>18</sup> Two other birth centre studies reported higher  
57  
58 227 rates of spontaneous vaginal birth and lower rates of adverse infant outcomes (neonatal  
59  
60 228 intensive care unit [NICU] admission, low birthweight) compared to hospital births.<sup>19,20</sup>

1  
2  
3 229 Place of birth continues to be controversial in Australia. To generate evidence to assist  
4  
5 230 policy makers, health practitioners, and pregnant women and their families to make  
6  
7 231 informed decisions about place of birth, we undertook a national study combining data from  
8  
9 232 all eight Australian jurisdictions to examine the outcomes for women with low-risk  
10  
11 233 pregnancies related to three different birth settings. This is the first national study on the  
12  
13 234 comparative safety of different planned birth settings in Australia.

#### 15 235 **Aim**

17  
18 236 The study aimed to compare the perinatal and maternal outcomes for Australian women  
19  
20 237 with uncomplicated pregnancies according to planned place of birth, that is, hospital labour  
21  
22 238 wards, birth centres or at home.

#### 24 239 **METHODS**

##### 27 240 **Study design**

29  
30 241 The study used a population-based retrospective design, linking and analysing routinely  
31  
32 242 collected electronic data from multiple sources about births between 2000 and 2012 to  
33  
34 243 women with low-risk pregnancies. We compared outcomes from three cohorts comprising  
35  
36 244 women who were as comparable as possible given the available data. In Australia,  
37  
38 245 homebirth and birth centre options are mostly restricted to women who meet low-risk  
39  
40 246 criteria. We therefore endeavoured to ensure that the hospital cohort shared the same  
41  
42 247 characteristics, clinically if not demographically and applied the same filters on all three  
43  
44 248 cohorts to increase the similarity between groups.

45 249 The study was approved by a university Human Research Ethics Committee (HREC). HRECs in  
46  
47 250 each state and territory also approved access to anonymised linked data (see  
48  
49 251 Supplementary File 1). Patients and the public were not involved in the design or conduct of  
50  
51 252 the study.

##### 53 253 **Data sources**

55  
56 254 All eight Australian states and territories compile electronic perinatal datasets with items on  
57  
58 255 maternal characteristics, labour, birth, and perinatal outcomes in the immediate  
59  
60 256 postpartum period. However, to eliminate women with complicating conditions from the

1  
2  
3 257 sample and to examine deaths and major morbidity requiring hospitalisation beyond the  
4  
5 258 perinatal period, we examined additional data sources on deaths and hospital admissions  
6  
7 259 nine months before and twelve months following birth. This study used linked anonymous  
8  
9 260 data on all available mothers and infants from the following sources:

- 10 261 • *Perinatal Data Collection (PDC)* – maternal and infant data on all live births and  
11  
12 262 stillbirths from 20 weeks' gestation or >400g birth weight;
- 13  
14 263 • *Admitted Patient Data Collection (APDC)* – services provided to all individuals  
15  
16 264 admitted to public and private hospitals, using the International Classification of  
17  
18 265 Diseases – Australian modifications (ICD-10-AM)<sup>21</sup> for clinical data;
- 19  
20 266 • *Registry of Births, Deaths and Marriages (RBDM)* – all registered births and deaths;
- 21  
22 267 • *Australian Bureau of Statistics (ABS)* – data on deaths including primary cause of  
23  
24 268 death (only for NSW and Queensland).

25  
26 269 It was not possible to obtain data from all sources for all states and territories for the full  
27  
28 270 study period due to differences in data collection systems. Table footnotes indicate the  
29  
30 271 scope of data for each variable. In addition, not all states and territories provided data on  
31  
32 272 maternal mortality.

### 33 34 273 **Definitions**

35  
36  
37 274 We defined *low-risk pregnancy* as a singleton fetus in cephalic presentation between 37 and  
38  
39 275 41 completed weeks' gestation and free of known and recorded complications. Exclusions  
40  
41 276 are detailed in Box 1.

42  
43 277 < Insert Box 1 here >

44  
45  
46 278 *Planned place of birth* incorporates three possible locations: home, birth centre, and  
47  
48 279 hospital. *Homebirths* are instances where women intend to give birth outside a formal  
49  
50 280 health facility, usually their own home, and receive care from a registered midwife, funded  
51  
52 281 through either the public or private health system or self-funded. *Birth centres* provide a  
53  
54 282 home-like birth setting and are run by midwives. They can be located within a hospital  
55  
56 283 campus (alongside unit) or in a separate area (stand-alone unit) and require transfer to the  
57  
58 284 main hospital service for access to interventions such as epidural analgesia or caesarean  
59  
60

1  
2  
3 285 section. *Hospital births* take place in the labour ward or birth suite (terms vary across the  
4  
5 286 country) of either a public or private hospital, staffed by midwives and doctors.  
6  
7

8 287 The timing of the decision about birth setting is critical within the birthplace literature.

9 288 While women choose a birth location early in their pregnancy, clinical factors may preclude  
10  
11 289 them from achieving this intention. If they develop complications, they may no longer be  
12  
13 290 eligible to give birth in a birth centre or at home. These women are excluded from  
14

15 291 comparisons of outcome by birth setting if they transfer to hospital care prior to labour.

16  
17 292 Ideally, researchers should identify planned place of birth at labour onset, to ensure that all  
18  
19 293 participants have a similar level of clinical complexity. All Australian data collections record  
20  
21 294 intended place of birth, but the majority did not indicate intention at labour onset.

22 295 Therefore, the current study analyses data on planned place of birth identified at an  
23  
24 296 undetermined time in the pregnancy, as close to labour as we were able to identify. The  
25  
26 297 screening process eliminated women with many of the risk factors that would have  
27  
28 298 prompted antenatal transfer from a birth centre or homebirth.

29  
30 299 *Maternal outcomes* include mode of birth, interventions and procedures during labour and  
31  
32 300 birth (episiotomy, epidural or spinal analgesia, oxytocin augmentation), intact perineum (no  
33  
34 301 tears or episiotomy), maternal complications, and admission to a high dependency or  
35  
36 302 intensive care unit.

37  
38  
39 303 *Mode of birth* includes caesarean section, forceps birth, vacuum extraction, and normal  
40  
41 304 vaginal birth (non-instrumental). More specifically, *normal labour and birth* is defined as  
42  
43 305 spontaneous labour, cephalic presentation, without epidural, spinal or general anaesthesia,  
44  
45 306 forceps, vacuum extraction or episiotomy. Measures of *maternal complications* were severe  
46  
47 307 perineal trauma (3<sup>rd</sup> or 4<sup>th</sup> degree tear), postpartum haemorrhage (PPH) requiring a  
48  
49 308 transfusion, admission to intensive care or high dependency unit for more than 48 hours  
50  
51 309 and hospital readmission within 28 days. *Perinatal outcomes* include intrapartum stillbirth,  
52  
53 310 early neonatal death (0-7 days), late neonatal death (8-28 days), admission to special care or  
54  
55 311 neonatal intensive care unit (NICU) for more than 48 hours and readmission to hospital  
56  
57 312 within 28 days. We also stratified combined perinatal mortality data by parity. Other specific  
58  
59 313 definitions are included in relevant tables.  
60

## 315 **Data linkage**

316 Independent data linkage units (DLU) in each state matched information from the four data  
317 sources (where available), using probabilistic linkage techniques.<sup>22,23</sup> This generated de-  
318 identified health records linking information from multiple datasets about the same  
319 individuals. This process yields the best available data on maternal and infant health status.  
320 However, it is not infallible and has estimated false positive and false negative rates of 0.5%  
321 each.<sup>24</sup>

322 Cross-jurisdictional data linkage was not possible, as independent DLUs had diverging  
323 protocols for maintaining patient privacy. We therefore applied to the individual data  
324 custodians for access to the linked data, through the six DLUs (data linkage for the  
325 Australian Capital Territory and the Northern Territory is provided by NSW and SA units  
326 respectively). Data were combined on relevant variables, where comparable, into a national  
327 dataset. Box 2 provides details on the datasets.

328 < Insert Box 2 here >

## 329 **Data cleaning, screening and cohort selection**

330 Because the data collections were developed separately in each state and territory (except  
331 ABS collections), they had different characteristics and components. In particular, several  
332 PDC and APDC variables differed in name and type by jurisdiction. Even within the same  
333 state, some variable definitions changed over the study period, with items merged or split  
334 into multiple variables over time. The researchers scrutinised definitions to ensure accurate  
335 matching between variables with different names and attributes into a standardised  
336 dataset.

337 Our broad request to state DLUs specified data on women with singleton pregnancies and a  
338 cephalic presentation at 37 to 41 completed weeks' gestation. Datasets arrived in different  
339 formats and met our low-risk criteria to varying extents. We then applied more specific  
340 inclusion and exclusion criteria (Box 1) to generate the low-risk sample.

341

## 342 **Data analysis**

343 Data were converted to SPSS Version 24, then grouped according to women's planned place  
344 of birth for intention to treat analysis. Descriptive statistics were generated and reported  
345 using percentages (or incidence per 1000 births for postpartum complications and perinatal  
346 outcomes). Categorical variables were initially compared using chi-square tests, followed by  
347 odds ratios from binary logistic regression adjusted for maternal age, maternal country of  
348 birth (Australia or elsewhere), gestational age and parity (adjusted odds ratio=AOR). For  
349 simplicity, percentages were computed for incidence of events at each birth setting instead  
350 of examining the corresponding sensitivities and specificities of the data. Unfortunately,  
351 state and territory-based data collections have inconsistent variables on other potential  
352 demographic factors such as maternal education, socioeconomic status or body mass index,  
353 limiting the variables available for controlling the analysis. We also present analysis  
354 stratified by parity for normal labour and birth (Table 2) and perinatal mortality (Table 5).  
355 For continuous data such as maternal age and gestation week, we used univariate general  
356 linear model for analysis of variance (ANOVA) to examine the differences between the  
357 means.

358 No imputation was made to missing data. All calculations in regression and rates were  
359 computed based on non-missing data. Wherever necessary, sizes of missing data (not  
360 stated/inadequately described) on related variables were reported. The analysis reports  
361 99% confidence intervals. Statistical significance level was set at  $p < 0.01$ . Ethics approval  
362 requirements prevented us reporting cell sizes of less than five to maintain confidentiality.

## 363 **RESULTS**

### 364 **Demographic characteristics**

365 The sample comprised 1 251 420 births to women with full-term, singleton pregnancies  
366 without complications between 2000 and 2012. Of these, 1 171 703 (93.6%) births were  
367 planned in hospital labour wards (referred to as 'hospital' births), 71 505 (5.7%) in a birth  
368 centre and 8212 (0.7%) at home.



1  
2  
3 369 Women planning to give birth in hospital labour wards were more likely to be younger,  
4  
5 370 nulliparous, of a shorter gestation (less than 40 weeks) or Australian-born than those  
6  
7 371 planning birth centre or home births (Table 1).  
8

9 372 <Insert Table 1 here>  
10

### 11 373 **Mode of birth, intervention and analgesia by planned place of birth**

12  
13  
14  
15 374 Planned birth at home or in a birth centre was associated with normal labour and birth  
16  
17 375 more often than planned hospital birth. Women planning a birth centre birth were almost  
18  
19 376 three times as likely (AOR 2.72, 99% CI 2.63-2.81) and women planning a home birth were  
20  
21 377 almost six times as likely (AOR 5.91, 99% CI 5.15-6.78) to have a normal birth (Table 2). The  
22  
23 378 odds for nulliparous and multiparous women were similar.  
24

25 379 <Insert Table 2 here>  
26

27 380 Conversely, women planning hospital births were more likely to experience interventions in  
28  
29 381 birth. Compared with planned hospital births, births planned in other settings had  
30  
31 382 significantly lower odds of: vacuum extraction (birth centre AOR 0.42; 99% CI 0.40-0.44 and  
32  
33 383 homebirth AOR 0.18; 99% CI 0.14-0.24), forceps (birth centre AOR 0.54; 99% CI 0.50-0.58  
34  
35 384 and homebirth AOR 0.21; 99% CI 0.14-0.31) and intrapartum caesarean section (birth centre  
36  
37 385 AOR 0.45; 99% CI 0.43-0.48 and homebirth AOR 0.29; 99% CI 0.24-0.35).  
38

39 386 Women who planned a birth centre or home birth were significantly more likely to have an  
40  
41 387 intact perineum (birth centre AOR 1.16; 99% CI 1.14-1.19 and homebirth AOR 2.07; 99% CI  
42  
43 388 1.95-2.20) than those planning a hospital birth. Compared with planned hospital births, 3<sup>rd</sup>  
44  
45 389 or 4<sup>th</sup> degree perineal tears were less likely in planned home births (AOR 0.53; 99% CI 0.39-  
46  
47 390 0.73) and more likely in planned birth centre births (AOR 1.17; 53% CI 1.09-1.25). The odds  
48  
49 391 of episiotomy were much lower in both non-hospital groups (birth centre AOR 0.37; 99% CI  
50  
51 392 0.36-0.39 and homebirth AOR 0.13; 99% CI 0.10-0.15) than in planned hospital births.  
52

53 393 The odds of other interventions such as oxytocin augmentation and epidural or spinal  
54  
55 394 analgesia were lower in planned birth centre or home births (Table 3).  
56

57 395 <Insert Table 3 here>  
58  
59  
60



### 396 **Postpartum complications**

397 Women who planned to give birth in a birth centre were less likely to have a PPH requiring a  
398 blood transfusion than women who planned hospital births (AOR 0.66; 99% CI 0.56-0.78).

399 There was no significant difference in the odds for women who planned a home birth (AOR  
400 1.08; 99% CI 0.73-1.60). The odds for admission to an intensive care or a high dependency  
401 unit were lower for the planned birth centre group (AOR 0.42; 99% CI 0.31-0.56) but no  
402 different for the planned home birth group (AOR 0.41; 99% CI 0.15-1.08). However, the  
403 absolute number of admissions is small (Table 4). There were no significant differences  
404 between the groups in the odds of readmission to hospital within a month.

405 <Insert Table 4 here>

### 406 **Perinatal outcomes by planned place of birth**

407 There were no significant differences in the odds of intrapartum stillbirth, or early or late  
408 neonatal deaths between the three planned places of birth. Combined data on stillbirth  
409 during labour, early and late neonatal death indicate that women planning a home birth  
410 were no more likely to experience perinatal mortality than those planning a hospital birth  
411 (AOR 1.55; 99% CI 0.65-3.69), although the absolute number of deaths was very small  
412 (9/8182). Similarly, there was no significant difference for women planning a birth centre  
413 birth (AOR 0.84; 99% CI 0.60-1.19). When women were stratified by parity, there were no  
414 significant differences between any of the groups in the odds of perinatal mortality.

415 Women who planned a birth centre birth were more likely to have their baby admitted to  
416 the NICU and/or SCU for longer than 48 hours (AOR 1.24; 99% CI 1.10-1.39) than women  
417 who planned hospital births. This trend was not seen in planned home births (AOR 0.63;  
418 99% CI 0.39-1.01). There were no significant differences between the three groups in the  
419 odds of readmission of the baby to hospital within 28 days (Table 5).

420 <Insert Table 5 here>

### 421 **DISCUSSION**

422 This study, the first in Australia, has examined maternal and perinatal outcomes nationally  
423 by planned place of birth including all eight states and territories. Our study has

1  
2  
3 424 demonstrated results consistent with several international studies of planned place of  
4  
5 425 birth.<sup>11,12,14</sup> Normal births were more likely for women who planned birth in birth centres or  
6  
7 426 at home than in a hospital. Women who planned to give birth at home were older than  
8  
9 427 women planning hospital or birth centre births, but despite this, had consistently lower  
10  
11 428 rates of intervention.

12  
13 429 The unadjusted perinatal mortality ratio for planned hospital births was 0.8 per 1000 live  
14  
15 430 births compared with 0.4 in planned birth centre births and 1.1 in planned home births,  
16  
17 431 although the absolute risks were very small with low numbers of deaths overall. These  
18  
19 432 differences by place of birth were neither statistically significant for all women nor for  
20  
21 433 cohorts stratified by parity. However, the differences are more marked in nulliparous  
22  
23 434 women (0.8 per 1000 in planned hospital vs 1.7 per 1000 in planned homebirth) than  
24  
25 435 multiparous women (0.7 per 1000 in planned hospital vs 0.8 per 1000 in planned  
26  
27 436 homebirth). Given the small number of deaths in the planned homebirth group (n=9) this  
28  
29 437 may be a chance finding over a long period of time (13 years). However, it is similar the  
30  
31 438 combined perinatal outcome in the Birthplace in England study<sup>11</sup>, although that study did  
32  
33 439 find statistically significant higher odds of perinatal mortality among nulliparous women  
34  
35 440 planning home births. This highlights the need to explain the risks to women in absolute  
36  
37 441 terms, as this is likely to be more helpful in assisting decision-making.

38 442 There were two negative findings in relation to birth centre outcomes, firstly, a significantly  
39  
40 443 higher rate of severe perineal trauma (AOR 1.17; 99% CI 1.09-1.25) compared with planned  
41  
42 444 hospital births. Another Australian study<sup>16</sup> and one in New Zealand also found higher rates  
43  
44 445 of perineal trauma in birth centres.<sup>25</sup> However, other research found no significant  
45  
46 446 differences in perineal outcomes for example in studies in Norway,<sup>26,27</sup> Denmark,<sup>28</sup>  
47  
48 447 Australia<sup>29</sup> or England.<sup>30</sup> The higher rate of severe perineal trauma may be related to the use  
49  
50 448 of birth stools, more common in Australian birth centres but less frequently in hospitals or  
51  
52 449 at home. Birth stools have been linked to higher rates of severe perineal trauma compared  
53  
54 450 with other birth positions or waterbirth.<sup>31</sup> The higher rates of trauma could be due to better  
55  
56 451 case ascertainment or lower rates of episiotomy.

57 452 The study also found higher rates of infant admission to NICU/SCN for greater than 48 hours  
58  
59 453 (AOR 1.24; 99% CI 1.10-1.39) among planned birth centre births. This is different from other  
60

1  
2  
3 454 research, which either found higher rates associated with planned hospital births<sup>16,25</sup> or else  
4  
5 455 no statistically significant differences in NICU admission rates from birth centres and  
6  
7 456 hospital births.<sup>26,28,32</sup> The admissions to the NICU or SCN in the current study are low in  
8  
9 457 absolute terms (1 per 100 for birth centre births) but higher than planned hospital births.  
10  
11 458 This requires ongoing examination to determine possible reasons and ways to reduce the  
12  
13 459 rate.

14  
15 460 The study findings are important especially in light of evidence that shows associations  
16  
17 461 between intervention in labour and birth, and long-term maternal and newborn health. For  
18  
19 462 example, a recent population-based study showed that caesarean section is associated with  
20  
21 463 an increased risk of infections, eczema, and metabolic disorders in children aged five years,  
22  
23 464 compared with spontaneous vaginal births, especially for emergency caesarean sections.<sup>33</sup>

### 24 25 465 **Strengths and limitations**

26  
27  
28 466 This study is the first to comprehensively examine maternal and perinatal outcomes from  
29  
30 467 three birth settings across Australia. It used a population-based sample consisting of women  
31  
32 468 with low-risk pregnancies. The large sample size was sufficient to detect differences  
33  
34 469 between the three groups, although the numbers of homebirth nationally, even over this  
35  
36 470 time period, were comparatively small (i.e. 8212 only 0.7% of the total low-risk sample).

37  
38 471 Low-risk pregnancies were defined consistently across all three cohorts in the dataset.  
39  
40 472 However, merging linked data from multiple jurisdictions created several challenges and  
41  
42 473 potential shortcomings, including missing responses, inconsistent variable definitions and  
43  
44 474 limited data from some states. For example, Queensland's data collection only covered  
45  
46 475 2007-2012, resulting in under-representation: 9.6% of the combined sample, compared with  
47  
48 476 20.4% of Australian births in 2012.<sup>34</sup> Although we eliminated unintended home births  
49  
50 477 among women intending hospital or birth centre births (births before arrival), the home  
51  
52 478 birth data do not always record whether or not a qualified health professional attended.  
53  
54 479 Within the constraints of the data available, we have only included births attended by a  
55  
56 480 health professional. Moreover, different states recorded birthplace intentions at different  
57  
58 481 times. Although this means that intended birth place is not always recorded at onset of  
59  
60 482 labour, the scrupulous process of data cleaning and categorising eliminated most women  
483 with risk factors which would have rendered them ineligible for birth centre or home births.

1  
2  
3 484 Thus, the recorded birthplace intention was as close as possible to that at labour onset.  
4  
5 485 Some data items were collected inconsistently across the jurisdictions, for example, transfer  
6  
7 486 from home to hospital after the onset of labour. This was either because the data item did  
8  
9 487 not exist or because it only recorded 'transfer', which could have been at any time during  
10  
11 488 pregnancy. Therefore, we were unable to report on intrapartum transfer rates.

12  
13 489 Inconsistencies in the data from different jurisdictions also affected the data analysis. The  
14  
15 490 regression analysis incorporated very few potential confounders, limited to those for which  
16  
17 491 consistent data were available nation-wide (i.e. maternal age, gestational age, parity and  
18  
19 492 whether born in Australia or not). Socio-economic status is also inconsistently collected  
20  
21 493 across the country, as is maternal BMI and education, so we were unable to adjust for these  
22  
23 494 factors. Although this introduced some risk of selection bias, the process of identifying  
24  
25 495 women with low-risk pregnancies increased the comparability of the cohorts in terms of  
26  
27 496 clinical factors.

## 28 497 **CONCLUSION**

29  
30  
31 498 This study provides evidence on the safety of births planned in hospital, birth centre and at  
32  
33 499 home across all states and territories in Australia by comparing cohorts of women with low-  
34  
35 500 risk pregnancies. Inconsistencies between state-based datasets as described limited the  
36  
37 501 number of variables available for analysis. However, for healthy women with low-risk  
38  
39 502 pregnancies, planned birth centre births resulted in high rates of normal labour and birth,  
40  
41 503 low rates of most maternal complications, and comparable perinatal mortality outcomes.  
42  
43 504 Women planning home birth also had similarly positive maternal outcomes with no  
44  
45 505 statistically significant differences in the rate of perinatal mortality or NICU admission. In  
46  
47 506 absolute terms, the numbers of deaths were small, although the rate of perinatal mortality  
48  
49 507 was higher among nulliparous women who planned homebirths than their multiparous  
50  
51 508 counterparts.

52 509  
53  
54  
55  
56  
57  
58  
59  
60

510 **Box 1: Exclusion criteria**

Women were excluded if the baby was:

- Born before arrival for a planned birth at hospital or birth centre;
- Diagnosed antenatally with a congenital abnormality (all ICD-10-AM Q codes)

Women were also excluded if they had:

- Received no antenatal care;
- A previous caesarean section;
- A breech presentation;
- Labour induced for any reason;
- An elective caesarean section (pre-labour);
- Pre-existing (essential) and/or pregnancy-related hypertension;
- Pre-existing or gestational diabetes;
- Prolonged rupture of membranes;
- Antepartum haemorrhage or any other relevant pregnancy complications
- ICD-10-AM Diagnosis
  - O10 Pre-existing hypertension complicating pregnancy, childbirth and the puerperium
  - O11 Pre-eclampsia superimposed on chronic hypertension
  - O13 Gestational [pregnancy-induced] hypertension
  - O14 Pre-eclampsia
  - O15 Eclampsia
  - O24 Diabetes mellitus in pregnancy
  - O30 Multiple gestation
  - O31.2 Continuing pregnancy after intrauterine death of one fetus or more
  - O36.4 Maternal care for intrauterine death
  - O42 Premature rupture of membranes
  - O46 Antepartum haemorrhage
  - O75.5 Delayed delivery after artificial rupture of membranes
  - O75.7 Vaginal delivery following previous caesarean section
  - P95 Fetal death of unspecified cause

511

**Box 2: Proportion of births included in sample, by state and territory**

| State or Territory                                          | NSW       | QLD       | VIC       | SA        | WA        | TAS       | ACT       | NT        | Total     |
|-------------------------------------------------------------|-----------|-----------|-----------|-----------|-----------|-----------|-----------|-----------|-----------|
| Years of data provided                                      | 2000-2012 | 2007-2012 | 2000-2012 | 2000-2012 | 2000-2012 | 2005-2012 | 2000-2012 | 2000-2012 |           |
| Number of births which met low-risk criteria for this study | 507 017   | 114 245   | 370 356   | 69 356    | 130 848   | 19 915    | 23 484    | 16 199    | 1 251 420 |
| Proportion of total study sample                            | 40.5%     | 9.1%      | 29.6%     | 5.5%      | 10.5%     | 1.6%      | 1.9%      | 1.3%      | 100%      |

Key to the states and territories: NSW - New South Wales; Qld - Queensland, VIC – Victoria; SA – South Australia; WA – Western Australia; TAS – Tasmania; ACT – Australian Capital Territory; NT – Northern Territory

**Table 1: Demographic characteristics by planned place of birth**

|                                         | Hospital                     | Birth Centre             | Home                   |
|-----------------------------------------|------------------------------|--------------------------|------------------------|
| <b>All women</b>                        | <b>1 171 703<br/>(93.6%)</b> | <b>71 505<br/>(5.7%)</b> | <b>8212<br/>(0.7%)</b> |
| <b>Maternal age (years) - mean (sd)</b> | 29.0 (5.6)                   | 29.8 (5.3)               | 31.8 (5.0)             |
| <b>Maternal age (years)</b>             |                              |                          |                        |
| <20                                     | 61 451 (5.2%)                | 2044 (2.9%)              | 71 (0.9%)              |
| 20-24                                   | 200 386 (17.1%)              | 10 116 (14.1%)           | 548 (6.7%)             |
| 25-29                                   | 348 785 (29.8%)              | 21 579 (30.2%)           | 2047 (24.9%)           |
| 30-34                                   | 365 022 (31.2%)              | 23 949 (33.5%)           | 3058 (37.2%)           |
| 35-39                                   | 167 803 (14.3%)              | 11 931 (16.7%)           | 1997 (24.3%)           |
| ≥40                                     | 28 177 (2.4%)                | 1886 (2.6%)              | 474 (5.8%)             |
| Missing                                 | 79 (0.0%)                    | 0 (0.0%)                 | 17 (0.2%)              |
| <b>Previous pregnancies (≥20weeks)</b>  |                              |                          |                        |
| 0                                       | 494 019 (42.2%)              | 28 891 (40.4%)           | 2295 (27.9%)           |
| 1                                       | 376 047 (32.1%)              | 25 079 (35.1%)           | 2745 (33.4%)           |
| 2                                       | 174 873 (14.9%)              | 11 364 (15.9%)           | 1688 (20.6%)           |
| ≥3                                      | 126 111 (10.8%)              | 6153 (8.6%)              | 1456 (17.7%)           |
| Not stated                              | 653 (0.1%)                   | 18 (0.0%)                | 28 (0.3%)              |
| <b>Gestation* - mean (sd)</b>           | 39.5 (1.0)                   | 39.6 (1.0)               | 39.8 (1.0)             |
| <b>Gestation*</b>                       |                              |                          |                        |
| 37                                      | 54 825 (4.7%)                | 2403 (3.4%)              | 209 (2.5%)             |
| 38                                      | 155 764 (13.3%)              | 7470 (10.4%)             | 724 (8.8%)             |
| 39                                      | 323 179 (27.6%)              | 18 278 (25.6%)           | 1666 (20.3%)           |
| 40                                      | 481 665 (41.1%)              | 29 289 (41.0%)           | 3779 (46.0%)           |
| 41                                      | 156 270 (13.3%)              | 14 065 (19.7%)           | 1834 (22.3%)           |
| <b>Maternal country of birth</b>        |                              |                          |                        |
| Australia                               | 889 550 (75.9%)              | 56 201 (78.6%)           | 6822 (83.1%)           |
| Others                                  | 276 001 (23.6%)              | 15 105 (21.1%)           | 1188 (14.5%)           |
| Inadequately described/not stated       | 6152 (0.5%)                  | 199 (0.3%)               | 202 (2.5%)             |

\*Gestation is in completed weeks

Note: Chi-square tests on categorical data within each sub-heading between birth settings yielded statistically significant differences with  $p < 0.001$  in all categories with no missing or not stated data. GLM revealed significant differences at  $p < 0.0001$  between means in all pairwise comparisons.

Percentages may not total exactly 100% due to rounding.

**Table 3: Mode of birth and intervention rates by planned place of birth**

| Intervention and planned place of birth | No. events/births | Incidence of events (%) | Unadjusted OR    | Adjusted OR <sup>Æ</sup> |
|-----------------------------------------|-------------------|-------------------------|------------------|--------------------------|
| <b>Normal vaginal birth</b>             | 992 118/1 251 420 | 79.3                    |                  |                          |
| Hospital                                | 920 514/1 171 703 | 78.6                    | 1                | 1                        |
| Birth Centre                            | 63 790/71 505     | 89.2                    | 2.26 (2.19-2.33) | 2.72 (2.63-2.81)         |
| Home                                    | 7814/8212         | 95.2                    | 5.36 (4.69-6.12) | 5.91 (5.15-6.78)         |
| <b>Vacuum extraction</b>                | 88 586/1 251 420  | 7.1                     |                  |                          |
| Hospital                                | 85 975/1 171 703  | 7.3                     | 1                | 1                        |
| Birth Centre                            | 2503/71 505       | 3.5                     | 0.46 (0.43-0.48) | 0.42 (0.40-0.44)         |
| Home                                    | 108/8212          | 1.3                     | 0.17 (0.13-0.22) | 0.18 (0.14-0.24)         |
| <b>Forceps birth</b>                    | 56 332/1 251 420  | 4.5                     |                  |                          |
| Hospital                                | 54 451/1 171 703  | 4.6                     | 1                | 1                        |
| Birth Centre                            | 1820/71 505       | 2.5                     | 0.54 (0.50-0.57) | 0.54 (0.50-0.58)         |
| Home                                    | 61/8212           | 0.7                     | 0.15 (0.11-0.21) | 0.21 (0.14-0.31)         |
| <b>Intrapartum caesarean section</b>    | 94 303/1 251 420  | 7.5                     |                  |                          |
| Hospital                                | 91 238/1 171 703  | 7.8                     | 1                | 1                        |
| Birth Centre                            | 2871/71 505       | 4.0                     | 0.50 (0.47-0.52) | 0.45 (0.43-0.48)         |

**Table 2: Normal labour and birth<sup>†</sup> by planned place of birth and parity<sup>^^</sup>**

| Planned place of birth   | No. events <sup>†</sup> /births | Incidence of events (%) | Unadjusted OR    | Adjusted OR <sup>Æ</sup> |
|--------------------------|---------------------------------|-------------------------|------------------|--------------------------|
| <b>All women</b>         | 991 534/1 250 721               | 79.3                    |                  |                          |
| Hospital                 | 919 974/1 171 050               | 78.6                    | 1                | 1                        |
| Birth Centre             | 63 773/71 487                   | 89.2                    | 2.26 (2.19-2.33) | 2.72 (2.63-2.81)         |
| Home                     | 7787/8184                       | 95.1                    | 5.35 (4.69-6.11) | 5.91 (5.15-6.78)         |
| <b>Nulliparous women</b> | 322 640/525 205                 | 61.4                    |                  |                          |
| Hospital                 | 298 243/494 019                 | 60.4                    | 1                | 1                        |
| Birth Centre             | 22 401/28 891                   | 77.5                    | 2.27 (2.18-2.35) | 2.60 (2.50-2.70)         |
| Home                     | 1996/2295                       | 87.0                    | 4.38 (3.73-5.14) | 5.99 (5.09-7.04)         |
| <b>Multiparous women</b> | 668 894/725 516                 | 92.2                    |                  |                          |
| Hospital                 | 621 731/677 031                 | 91.8                    | 1                | 1                        |
| Birth Centre             | 41 372/42 596                   | 97.1                    | 3.01 (2.79-3.24) | 3.27 (3.03-3.53)         |
| Home                     | 5791/5889                       | 98.3                    | 5.26 (4.04-6.83) | 5.86 (4.50-7.62)         |

<sup>Æ</sup> Logistic regression adjusted for maternal age, country of birth, gestational age and parity at 99% CI.

<sup>†</sup> Normal labour and birth – spontaneous labour, no epidural or spinal, general anaesthesia, forceps, vacuum extraction or episiotomy.

<sup>^^</sup> Parity refers to previous pregnancies  $\geq 20$  weeks.

Cases with missing data were not included in rates or regression calculations



|                                                       |                    |      |                  |                  |
|-------------------------------------------------------|--------------------|------|------------------|------------------|
| Home                                                  | 194/8212           | 2.4  | 0.29 (0.24-0.35) | 0.29 (0.24-0.35) |
| <b>Mode of birth not stated</b>                       | 20 081/1 251 420   | 1.6  |                  |                  |
| Hospital                                              | 19 525/1 171 703   | 1.7  | 1                | 1                |
| Birth Centre                                          | 521/71 505         | 0.7  | 0.43 (0.39-0.49) | 0.41 (0.36-0.46) |
| Home                                                  | 35/8212            | 0.4  | 0.25 (0.16-0.39) | 0.26 (0.17-0.41) |
| <b>Intact perineum*</b>                               | 382 570/1 251 420  | 30.6 |                  |                  |
| Hospital                                              | 355 689/1 171 703  | 30.4 | 1                | 1                |
| Birth Centre                                          | 22 949/71 505      | 32.1 | 1.08 (1.06-1.11) | 1.16 (1.14-1.19) |
| Home                                                  | 3932/8212          | 47.9 | 2.11 (1.99-2.23) | 2.07 (1.95-2.20) |
| <b>3rd or 4th degree perineal trauma<sup>†*</sup></b> | 23 165/1 157 117*  | 2.0  |                  |                  |
| Hospital                                              | 21 454/1 080 465   | 2.0  | 1                | 1                |
| Birth Centre                                          | 1641/68 634        | 2.4  | 1.21 (1.13-1.29) | 1.17 (1.09-1.25) |
| Home                                                  | 70/8018            | 0.9  | 0.43 (0.32-0.59) | 0.53 (0.39-0.73) |
| <b>Episiotomy*</b>                                    | 193 171/1 157 117* | 16.7 |                  |                  |
| Hospital                                              | 187 276/1 080 465  | 17.3 | 1                | 1                |
| Birth Centre                                          | 5688/68 634        | 8.3  | 0.43(0.42-0.45)  | 0.37(0.36-0.39)  |
| Home                                                  | 207/8018           | 2.6  | 0.13(0.11-0.15)  | 0.13(0.10-0.15)  |
| <b>Oxytocin augmentation</b>                          | 199 302/1 251 420  | 15.9 |                  |                  |
| Hospital                                              | 193 229/1 171 703  | 16.5 | 1                | 1                |
| Birth Centre                                          | 5790/71 505        | 8.1  | 0.45 (0.43-0.46) | 0.41 (0.40-0.43) |
| Home                                                  | 283/8212           | 3.4  | 0.18 (0.15-0.21) | 0.19 (0.16-0.22) |

|                                                |                   |      |                  |                  |
|------------------------------------------------|-------------------|------|------------------|------------------|
| <b>Epidural or spinal analgesia for labour</b> | 166 746/1 251 420 | 13.3 |                  |                  |
| Hospital                                       | 161 796/1 171 703 | 13.8 | 1                | 1                |
| Birth Centre                                   | 4675/71 505       | 6.5  | 0.44 (0.42-0.45) | 0.41 (0.39-0.43) |
| Home                                           | 275/8212          | 3.3  | 0.22 (0.18-0.25) | 0.22 (0.19-0.26) |

<sup>Æ</sup> Logistic regression adjusted for maternal age, country of birth, gestational age and parity at 99% CI.

\* Denominator = excluded caesarean section

¥ Included episiotomy extensions

Cases with missing data were not included in rates or regression calculations. No imputation was implemented to avoid data contamination. However, noises from data was unavoidably retained. Variables on mode of birth and intervention are as defined by each state or territory.

For peer review only

**Table 4: Postpartum complications by planned place of birth**

| Complication and planned place of birth                                                | No. events/births | Incidence of events/1000 births | Unadjusted OR    | Adjusted OR <sup>Æ</sup> |
|----------------------------------------------------------------------------------------|-------------------|---------------------------------|------------------|--------------------------|
| <b>Postpartum haemorrhage with blood transfusion</b>                                   | 6518/1 251 420    | 5.2                             |                  |                          |
| Hospital                                                                               | 6230/1 171 703    | 5.3                             | 1                | 1                        |
| Birth Centre                                                                           | 244/71 505        | 3.4                             | 0.64 (0.54-0.76) | 0.66 (0.56-0.78)         |
| Home                                                                                   | 44/8212           | 5.4                             | 1.01 (0.68-1.49) | 1.08 (0.73-1.60)         |
| <b>Admission at least 48 hrs to intensive care or high dependency unit<sup>∞</sup></b> | 2602/707 221*     | 3.7                             |                  |                          |
| Hospital                                                                               | 2521/654 960      | 3.8                             | 1                | 1                        |
| Birth Centre                                                                           | 74/47 266         | 1.6                             | 0.41 (0.30-0.55) | 0.42 (0.31-0.56)         |
| Home                                                                                   | 7/4995            | 1.4                             | 0.36 (0.14-0.96) | 0.41 (0.15-1.08)         |
| <b>Readmission to hospital (within 28 days)</b>                                        | 917/864 865**     | 1.1                             |                  |                          |
| Hospital                                                                               | 843/804 667       | 1.0                             | 1                | 1                        |
| Birth Centre                                                                           | 68/54 522         | 1.2                             | 1.19 (0.86-1.65) | 1.18 (0.85-1.64)         |
| Home                                                                                   | 6/5676            | 1.1                             | 1.01 (0.35-2.90) | 1.08 (0.38-3.12)         |

<sup>Æ</sup> Logistic regression adjusted for maternal age, country of birth, gestational age and parity at 99% CI.

\* Excluded QLD, VIC, NT, ACT, TAS

<sup>∞</sup> Intensive care and high dependency units provided additional care – these were defined by each state and territory

\*\* Excluded VIC, NT

Cases with missing data were not included in rates or regression calculations

Table 5: Perinatal outcomes by planned place of birth and parity<sup>^^</sup>

| Planned place of birth                                                 | No. events/births          | Incidence of events/1000 births | Unadjusted OR     | Adjusted OR <sup>Æ</sup> |
|------------------------------------------------------------------------|----------------------------|---------------------------------|-------------------|--------------------------|
| <b>Stillbirth during labour, early and late neonatal death</b>         |                            |                                 |                   |                          |
| <b>All women<sup>^</sup></b>                                           | 921/1 250 721 <sup>^</sup> | 0.7                             |                   |                          |
| Hospital                                                               | 880/1 171 050              | 0.8                             | 1                 | 1                        |
| Birth Centre                                                           | 32/71 487                  | 0.4                             | 0.60 (0.37-0.95)  | 0.84 (0.60-1.19)         |
| Home                                                                   | 9/8182                     | 1.1                             | 1.46 (0.62-3.47)  | 1.55 (0.65-3.69)         |
| <b>Nulliparous women</b>                                               | 425/525 205                | 0.8                             |                   |                          |
| Hospital                                                               | 406/494 019                | 0.8                             | 1                 | 1                        |
| Birth Centre                                                           | 15/28 891                  | 0.5                             | 0.63 (0.32-1.24)  | 0.65 (0.33-1.27)         |
| Home                                                                   | 4/2295                     | 1.7                             | 2.12 (0.58-7.75)  | 2.12 (0.58-7.82)         |
| <b>Multiparous women</b>                                               | 496/725 516                | 0.7                             |                   |                          |
| Hospital                                                               | 474/677 031                | 0.7                             | 1                 | 1                        |
| Birth Centre                                                           | 17/42 596                  | 0.4                             | 0.57 (0.30-1.08)  | 0.65 (0.34-1.23)         |
| Home                                                                   | 5/5889                     | 0.8                             | 1.21 (0.38-3.86)  | 1.29 (0.40-4.14)         |
| <b>Stillbirth during labour</b>                                        |                            |                                 |                   |                          |
| <b>All women</b>                                                       | 399/1 251 420              | 0.32                            |                   |                          |
| Hospital                                                               | 378/1 171 703              | 0.32                            | 1                 | 1                        |
| Birth Centre                                                           | 17/71 505                  | 0.24                            | 0.74 (0.39-1.40)  | 0.78 (0.41-1.48)         |
| Home                                                                   | 4/8212                     | 0.49                            | 1.51 (0.41-5.51)  | 1.56 (0.42-5.71)         |
| <b>Early neonatal death<sup>1</sup></b>                                |                            |                                 |                   |                          |
| <b>All women</b>                                                       | 240/881 064 <sup>**</sup>  | 0.27                            |                   |                          |
| Hospital                                                               | 221/819 963                | 0.27                            | 1                 | 1                        |
| Birth Centre                                                           | 14/55 312                  | 0.25                            | 0.94 (0.46-1.91)  | 0.94 (0.46-1.92)         |
| Home                                                                   | 5/5789                     | 0.86                            | 3.21 (1.00-10.28) | 3.18 (0.98-10.30)        |
| <b>Late neonatal death<sup>2</sup></b>                                 |                            |                                 |                   |                          |
| <b>All women</b>                                                       | 95/881 064 <sup>*</sup>    | 0.11                            |                   |                          |
| Hospital                                                               | 94/819 963                 | 0.11                            | 1                 | 1                        |
| Birth Centre                                                           | 1/55 312                   | 0.02                            | 0.16 (0.01-2.10)  | 0.19 (0.01-2.50)         |
| Home                                                                   | 0/5789                     | 0.00                            | na                | na                       |
| <b>Admission to SCN and/or NICU &gt;48hrs (all babies)<sup>3</sup></b> | 7500/881 064 <sup>*</sup>  | 8.51                            |                   |                          |
| Hospital                                                               | 6908/819 963               | 8.42                            | 1                 | 1                        |
| Birth Centre                                                           | 562/55 312                 | 10.16                           | 1.21 (1.08-1.35)  | 1.24 (1.10-1.39)         |
| Home                                                                   | 30/5789                    | 5.18                            | 0.61 (0.38-0.98)  | 0.63 (0.39-1.01)         |
| <b>Readmission to hospital within 28 days<sup>4</sup></b>              |                            |                                 |                   |                          |
| <b>All babies</b>                                                      | 37 569/1 251 420           | 30.02                           |                   |                          |
| Hospital                                                               | 35 413/1 171 703           | 30.22                           | 1                 | 1                        |
| Birth Centre                                                           | 1967/71 505                | 27.51                           | 0.91 (0.85-0.96)  | 0.95 (0.90-1.01)         |
| Home                                                                   | 189/8212                   | 23.02                           | 0.76 (0.63-0.91)  | 0.83 (0.68-1.00)         |

<sup>1</sup> Early neonatal death: death of a liveborn infant occurring within 7 completed days from the time of birth.

<sup>2</sup> Late neonatal death: death of a liveborn infant occurring after 7 completed days but before 29 completed days.

1  
2  
3  
4  
5  
6  
7  
8  
9  
10  
11  
12  
13  
14  
15  
16  
17  
18  
19  
20  
21  
22  
23  
24  
25  
26  
27  
28  
29  
30  
31  
32  
33  
34  
35  
36  
37  
38  
39  
40  
41  
42  
43  
44  
45  
46  
47  
48  
49  
50  
51  
52  
53  
54  
55  
56  
57  
58  
59  
60

<sup>3</sup> NICU and SCN were combined due to complexities in the data to separate them out for all states and territories, except the Northern Territory where there was only SCN available and for South Australia where only NICU was available.

<sup>4</sup> For home births, this is defined as admission to hospital following birth within 28 days.

<sup>^</sup> Denominator excluded missing parity information. The denominator in the first section of this table has 699 records with missing data for parity. Because this part of the data analysis was stratified by parity, we excluded the women whose parity data were unavailable.

\* Excluded VIC.

<sup>Æ</sup> Logistic regression was undertaken with adjustments occurring for maternal age, country of birth, gestational age, and parity at 99% CI. Any case with missing data was excluded from the regression.

<sup>^^</sup> Parity refers to previous pregnancies  $\geq 20$  weeks.

## REFERENCES

1. Australian Institute of Health and Welfare. Australia's mothers and babies 2015 – in brief. Perinatal statistics series no. 33. Cat no. PER 91. Canberra: AIHW; 2017.
2. Homer C. Models of maternity care: evidence for midwifery continuity of care. *Medical Journal of Australia* 2016; **205**: 370-4.
3. Donnelly N, Butler-Henderson K, Chapman M, Sullivan E. The development of a classification system for maternity models of care. *Health Information Management Journal* 2016; **45**(2): 64-70.
4. Monk A, Tracy S, Foureur M, Barclay L. Australian primary maternity units: past, present and future. *Women Birth* 2013; **26**(3): 213-8.
5. ABS. Australian Demographic Statistics. 2018. <http://www.abs.gov.au/ausstats/abs@.nsf/mf/3101.0> (accessed 13 June 2018).
6. Catling-Paull C, Foureur M, Homer C, on behalf of the members of the Publicly-funded Homebirth Consortium. Publicly-funded homebirth models in Australia. *Women & Birth* 2012; **25**: 152-8.
7. Catling-Paull C, Coddington R, Foureur M, Homer CSE. Publicly-funded homebirth in Australia: A review of maternal and neonatal outcomes for the last 6 years. *MJA* 2013; **198**(11): 616-20.
8. Scarf V, Rossiter C, Vedam S, et al. Maternal and perinatal outcomes by planned place of birth among women with low-risk pregnancies in high-income countries: A systematic review and meta-analysis. *Midwifery* 2018; **62**: 240-55.
9. ABS. Births, Australia 2016. 2017. <http://www.abs.gov.au/ausstats/abs@.nsf/Latestproducts/3301.0Main%20Features32016?opendocument&tabname=Summary&prodno=3301.0&issue=2016&num=&view=> (accessed 13 June 2018).
10. Kennare R, Keirse M, Tucker G, Chan A. Planned home and hospital births in South Australia, 1991-2006: differences in outcomes. *Medical Journal of Australia* 2010; **192**: 76-80.
11. Birthplace in England Collaborative Group. Perinatal and maternal outcomes by planned place of birth for healthy women with low risk pregnancies: the Birthplace in England national prospective cohort study. *BMJ* 2011; **343**:d7400 doi: 10.1136/bmj.d7400.
12. de Jonge A, van der Goes B, Ravelli A, et al. Perinatal mortality and morbidity in a nationwide cohort of 529 688 low-risk planned home and hospital births. *BJOG* 2009; **116**(9): 1177-84.
13. de Jonge A, Geerts C, van der Goes B, Mol B, Buitendijk S, Nijhuis J. Perinatal mortality and morbidity up to 28 days after birth among 743 070 low-risk planned home and hospital births: a cohort study based on three merged national perinatal databases. *Bjog* 2015; **122**(5): 720-8.
14. Hutton E, Cappelletti A, Reitsma A, et al. Outcomes associated with planned place of birth among women with low-risk pregnancies. *Cmaj* 2016; **188**(5): E80-90.
15. Laws P, Xu F, Welsh A, Tracy S, Sullivan E. Maternal morbidity of women receiving birth center care in New South Wales: a matched-pair analysis using linked health data. *Birth* 2014; **41**(3): 268-75.
16. Laws P, Tracy S, Sullivan E. Perinatal outcomes of women intending to give birth in birth centers in Australia. *Birth* 2010; **37**(1): 28-36.
17. Tracy S, Dahlen H, Laws P, Wang Y, Tracy M, Sullivan E. Birth centres in Australia. A national population-based study of perinatal mortality associated with giving birth in a birth centre. *Birth* 2007; **34**(3): 194-201.
18. Homer CSE, Davis GK, Petocz P, Barclay L, Matha D, Chapman MG. The obstetric outcomes of low risk women: birth centre versus labour ward. *Australian Journal of Advanced Nursing* 2000; **18**(1): 8-12.

19. Monk A, Tracy M, Foureur M, Grigg C, Tracy S. Evaluating Midwifery Units (EMU): a prospective cohort study of freestanding midwifery units in New South Wales, Australia. *BMJ Open* 2014; **4**(10).
20. Ryan M, Roberts C. A retrospective cohort study comparing the clinical outcomes of a birth centre and labour ward in the same hospital. *Australian Midwifery* 2005; **18**(2): 17-21.
21. Australian Consortium for Classification Development. ICD-10-AM/ACHI/ACS. 2018. <https://www.accd.net.au/icd10.aspx> (accessed 4 June 2018).
22. Harron K, Wade A, Gilbert R, Muller-Pebody B, Goldstein H. Evaluating bias due to data linkage error in electronic healthcare records. *BMC Med Res Methodol* 2014; **14**: 36.
23. Meray N, Reitsma J, Ravelli A, Bonsel G. Probabilistic record linkage is a valid and transparent tool to combine databases without a patient identification number. *J Clin Epidemiol* 2007; **60**(9): 883-91.
24. Centre for Health Record Linkage. Quality assurance. 2018. <http://www.cherel.org.au/quality-assurance> (accessed 21 May 2018).
25. Davis D, Baddock S, Pairman S, et al. Planned Place of Birth in New Zealand: Does it Affect Mode of Birth and Intervention Rates Among Low-Risk Women? *Birth: Issues in Perinatal Care* 2011; **38**(2): 111-9 9p.
26. Bernitz S, Rolland R, Blix E, et al. Is the operative delivery rate in low-risk women dependent on the level of birth care? A randomised controlled trial. *BJOG: An International Journal of Obstetrics and Gynaecology* 2011: 1357-64.
27. Eide BI, Nilsen AB, Rasmussen S. Births in two different delivery units in the same clinic--a prospective study of healthy primiparous women. *BMC Pregnancy & Childbirth* 2009; **9**: 25.
28. Overgaard C, Moller AM, Fenger-Gron F, et al. Freestanding midwifery unit versus obstetric unit: a matched cohort study of outcomes in low-risk women South Australian group of newborn samples. *BMJ Open* 2011.
29. Homer CS, Thornton C, Scarf VL, et al. Birthplace in New South Wales, Australia: an analysis of perinatal outcomes using routinely collected data. *BMC Pregnancy & Childbirth* 2014; **14**: 206.
30. Birthplace in England Collaborative Group. Perinatal and maternal outcomes by planned place of birth for healthy women with low risk pregnancies: the Birthplace in England national prospective cohort study. *BMJ* 2011.
31. Dahlen H, Dowling H, Tracy M, Schmied V, Tracy S. Maternal and perinatal outcomes amongst low risk women giving birth in water compared to six birth positions on land. A descriptive cross sectional study in a birth centre over 12 years. *Midwifery* 2013; **29**(7): 759-64.
32. Byrne JP, Crowther CA, Moss JR. A randomised controlled trial comparing birthing centre care with delivery suite care in Adelaide, Australia. *ANZJOG* 2000; **40**(3): 268-74.
33. Peters L, Thornton C, de Jonge A, et al. The effect of medical and operative birth interventions on child health outcomes in the first 28 days and up to 5 years of age: A linked data population-based cohort study. *Birth* 2018.
34. Hilder L, Zhichao Z, Parker M, Jahan S, Chambers G. Australia's mothers and babies 2012 (Perinatal statistics series no. 30. Cat. no. PER 69). Canberra: AIHW; 2014.

1  
2  
3  
4  
5  
6  
7  
8  
9  
10  
11  
12  
13  
14  
15  
16  
17  
18  
19  
20  
21  
22  
23  
24  
25  
26  
27  
28  
29  
30  
31  
32  
33  
34  
35  
36  
37  
38  
39  
40  
41  
42  
43  
44  
45  
46

For peer review only



**SUPPLEMENTARY FILE 1****Ethics approval**

The study received initial ethical approval from the lead university's Human Research Ethics Committee (HREC) – University of Technology Sydney, Australia (university reference number: 2012000167). Each state and territory also provided ethical approval.

| <b>State or territory</b>    | <b>Name of the ethics committee(s)</b>                                                                                      | <b>Number/ID of the approval</b> |
|------------------------------|-----------------------------------------------------------------------------------------------------------------------------|----------------------------------|
| Australian Capital Territory | ACT Health HREC                                                                                                             | ETH 3.14.061                     |
| New South Wales              | NSW Population and Health Services HREC                                                                                     | HREC/14/CIPHS/15                 |
| Northern Territory           | Department of Health of the Northern Territory and the Menzies School of Health Research HREC                               | HREC 2014-2247                   |
| Queensland                   | Qld Health Office of the HREC                                                                                               | HREC/14/QGC/175                  |
| South Australia              | South Australian Health HREC                                                                                                | HREC/14/SAH/117                  |
| Tasmania                     | Tasmania Network HREC                                                                                                       | Ref No: H0015023                 |
| Victoria                     | Department of Health and Human Services – Consultative Council on Obstetric and Paediatric Mortality and Morbidity (CCOPMM) | Ref: 14/12                       |
| Western Australia            | Government of Western Australia, Department of Health HREC                                                                  | HREC 2014/57                     |

STROBE Statement—Checklist of items that should be included in reports of *cohort studies*

|                              | Item No | Recommendation                                                                                                                                                                                    | Page no       |
|------------------------------|---------|---------------------------------------------------------------------------------------------------------------------------------------------------------------------------------------------------|---------------|
| <b>Title and abstract</b>    | 1       | (a) Indicate the study's design with a commonly used term in the title or the abstract                                                                                                            | 1             |
|                              |         | (b) Provide in the abstract an informative and balanced summary of what was done and what was found                                                                                               | 1             |
| <b>Introduction</b>          |         |                                                                                                                                                                                                   |               |
| Background/rationale         | 2       | Explain the scientific background and rationale for the investigation being reported                                                                                                              | 6             |
| Objectives                   | 3       | State specific objectives, including any prespecified hypotheses                                                                                                                                  | 8             |
| <b>Methods</b>               |         |                                                                                                                                                                                                   |               |
| Study design                 | 4       | Present key elements of study design early in the paper                                                                                                                                           | 8             |
| Setting                      | 5       | Describe the setting, locations, and relevant dates, including periods of recruitment, exposure, follow-up, and data collection                                                                   | 8-9           |
| Participants                 | 6       | (a) Give the eligibility criteria, and the sources and methods of selection of participants. Describe methods of follow-up                                                                        | 8-9           |
|                              |         | (b) For matched studies, give matching criteria and number of exposed and unexposed                                                                                                               | NA            |
| Variables                    | 7       | Clearly define all outcomes, exposures, predictors, potential confounders, and effect modifiers. Give diagnostic criteria, if applicable                                                          | 9-10          |
| Data sources/<br>measurement | 8*      | For each variable of interest, give sources of data and details of methods of assessment (measurement). Describe comparability of assessment methods if there is more than one group              | 10-11         |
| Bias                         | 9       | Describe any efforts to address potential sources of bias                                                                                                                                         | 10-11         |
| Study size                   | 10      | Explain how the study size was arrived at                                                                                                                                                         |               |
| Quantitative variables       | 11      | Explain how quantitative variables were handled in the analyses. If applicable, describe which groupings were chosen and why                                                                      | 11-12         |
| Statistical methods          | 12      | (a) Describe all statistical methods, including those used to control for confounding                                                                                                             | 11-12         |
|                              |         | (b) Describe any methods used to examine subgroups and interactions                                                                                                                               | 11-12         |
|                              |         | (c) Explain how missing data were addressed                                                                                                                                                       | 12            |
|                              |         | (d) If applicable, explain how loss to follow-up was addressed                                                                                                                                    | NA            |
|                              |         | (e) Describe any sensitivity analyses                                                                                                                                                             | NA            |
| <b>Results</b>               |         |                                                                                                                                                                                                   |               |
| Participants                 | 13*     | (a) Report numbers of individuals at each stage of study—eg numbers potentially eligible, examined for eligibility, confirmed eligible, included in the study, completing follow-up, and analysed | 12<br>Table 1 |
|                              |         | (b) Give reasons for non-participation at each stage                                                                                                                                              | 12            |
|                              |         | (c) Consider use of a flow diagram                                                                                                                                                                | Table 1       |
| Descriptive data             | 14*     | (a) Give characteristics of study participants (eg demographic, clinical, social) and information on exposures and potential confounders                                                          | 12            |
|                              |         | (b) Indicate number of participants with missing data for each variable of interest                                                                                                               | In each table |
|                              |         | (c) Summarise follow-up time (eg, average and total amount)                                                                                                                                       | NA            |

|    |                          |     |                                                                                                                                                                                                              |                      |
|----|--------------------------|-----|--------------------------------------------------------------------------------------------------------------------------------------------------------------------------------------------------------------|----------------------|
| 1  | Outcome data             | 15* | Report numbers of outcome events or summary measures over time                                                                                                                                               | 12-14                |
| 2  |                          |     |                                                                                                                                                                                                              |                      |
| 3  |                          |     |                                                                                                                                                                                                              |                      |
| 4  | Main results             | 16  | (a) Give unadjusted estimates and, if applicable, confounder-adjusted estimates and their precision (eg, 95% confidence interval). Make clear which confounders were adjusted for and why they were included | 12-14<br>Plus tables |
| 5  |                          |     |                                                                                                                                                                                                              |                      |
| 6  |                          |     |                                                                                                                                                                                                              |                      |
| 7  |                          |     |                                                                                                                                                                                                              |                      |
| 8  |                          |     |                                                                                                                                                                                                              |                      |
| 9  |                          |     | (b) Report category boundaries when continuous variables were categorized                                                                                                                                    | Tables               |
| 10 |                          |     |                                                                                                                                                                                                              |                      |
| 11 |                          |     | (c) If relevant, consider translating estimates of relative risk into absolute risk for a meaningful time period                                                                                             | NA                   |
| 12 |                          |     |                                                                                                                                                                                                              |                      |
| 13 |                          |     |                                                                                                                                                                                                              |                      |
| 14 | Other analyses           | 17  | Report other analyses done—eg analyses of subgroups and interactions, and sensitivity analyses                                                                                                               | NA                   |
| 15 |                          |     |                                                                                                                                                                                                              |                      |
| 16 |                          |     |                                                                                                                                                                                                              |                      |
| 17 | <b>Discussion</b>        |     |                                                                                                                                                                                                              |                      |
| 18 | Key results              | 18  | Summarise key results with reference to study objectives                                                                                                                                                     | 14-15                |
| 19 | Limitations              | 19  | Discuss limitations of the study, taking into account sources of potential bias or imprecision. Discuss both direction and magnitude of any potential bias                                                   | 16                   |
| 20 |                          |     |                                                                                                                                                                                                              |                      |
| 21 |                          |     |                                                                                                                                                                                                              |                      |
| 22 |                          |     |                                                                                                                                                                                                              |                      |
| 23 | Interpretation           | 20  | Give a cautious overall interpretation of results considering objectives, limitations, multiplicity of analyses, results from similar studies, and other relevant evidence                                   | 16-17                |
| 24 |                          |     |                                                                                                                                                                                                              |                      |
| 25 |                          |     |                                                                                                                                                                                                              |                      |
| 26 |                          |     |                                                                                                                                                                                                              |                      |
| 27 | Generalisability         | 21  | Discuss the generalisability (external validity) of the study results                                                                                                                                        | 15-17                |
| 28 |                          |     |                                                                                                                                                                                                              |                      |
| 29 | <b>Other information</b> |     |                                                                                                                                                                                                              |                      |
| 30 | Funding                  | 22  | Give the source of funding and the role of the funders for the present study and, if applicable, for the original study on which the present article is based                                                | 2                    |
| 31 |                          |     |                                                                                                                                                                                                              |                      |
| 32 |                          |     |                                                                                                                                                                                                              |                      |
| 33 |                          |     |                                                                                                                                                                                                              |                      |

\*Give information separately for exposed and unexposed groups.

**Note:** An Explanation and Elaboration article discusses each checklist item and gives methodological background and published examples of transparent reporting. The STROBE checklist is best used in conjunction with this article (freely available on the Web sites of PLoS Medicine at <http://www.plosmedicine.org/>, Annals of Internal Medicine at <http://www.annals.org/>, and Epidemiology at <http://www.epidem.com/>). Information on the STROBE Initiative is available at <http://www.strobe-statement.org>.

# BMJ Open

## Maternal and perinatal outcomes by planned place of birth in Australia 2000 – 2012: A linked population data study

|                                 |                                                                                                                                                                                                                                                                                                                                                                                                                                                                                                                                                                                                                                                                                                                                                                                                                                                                                                                                                                                                                                                                                                                                              |
|---------------------------------|----------------------------------------------------------------------------------------------------------------------------------------------------------------------------------------------------------------------------------------------------------------------------------------------------------------------------------------------------------------------------------------------------------------------------------------------------------------------------------------------------------------------------------------------------------------------------------------------------------------------------------------------------------------------------------------------------------------------------------------------------------------------------------------------------------------------------------------------------------------------------------------------------------------------------------------------------------------------------------------------------------------------------------------------------------------------------------------------------------------------------------------------|
| Journal:                        | <i>BMJ Open</i>                                                                                                                                                                                                                                                                                                                                                                                                                                                                                                                                                                                                                                                                                                                                                                                                                                                                                                                                                                                                                                                                                                                              |
| Manuscript ID                   | bmjopen-2019-029192.R1                                                                                                                                                                                                                                                                                                                                                                                                                                                                                                                                                                                                                                                                                                                                                                                                                                                                                                                                                                                                                                                                                                                       |
| Article Type:                   | Original research                                                                                                                                                                                                                                                                                                                                                                                                                                                                                                                                                                                                                                                                                                                                                                                                                                                                                                                                                                                                                                                                                                                            |
| Date Submitted by the Author:   | 21-Jul-2019                                                                                                                                                                                                                                                                                                                                                                                                                                                                                                                                                                                                                                                                                                                                                                                                                                                                                                                                                                                                                                                                                                                                  |
| Complete List of Authors:       | Homer, Caroline; University of Technology Sydney, Centre for Midwifery, Child and Family Health; Burnet Institute, Maternal and Child Health<br>Cheah, Seong; University of Technology Sydney Faculty of Health, Centre for Midwifery, Child and Family Health<br>Rossiter, Chris; University of Technology Sydney,<br>Dahlen, Hannah; University of Western Sydney, School of Nursing and Midwifery<br>Ellwood, David; Griffith University, School of Medicine<br>Foureur, Maralyn; UTS, Health<br>Forster, Della; La Trobe University, Judith Lumley Centre; Royal Women's Hospital, Maternity Services<br>McLachlan, HL; La Trobe University, Judith Lumley Centre; La Trobe University, School of Nursing and Midwifery<br>Oats, Jeremy; University of Melbourne Institute, Melbourne School of Population and Global Health<br>Sibbritt, David; University of Technology Sydney, Faculty of Health<br>Thornton, Charlene; Flinders University Faculty of Medicine Nursing and Health Sciences, College of Nursing and Health Sciences<br>Scarf, Vanessa; University of Technology Sydney, Centre for Midwifery, Child and Family Health |
| <b>Primary Subject Heading</b>: | Obstetrics and gynaecology                                                                                                                                                                                                                                                                                                                                                                                                                                                                                                                                                                                                                                                                                                                                                                                                                                                                                                                                                                                                                                                                                                                   |
| Secondary Subject Heading:      | Obstetrics and gynaecology, Nursing                                                                                                                                                                                                                                                                                                                                                                                                                                                                                                                                                                                                                                                                                                                                                                                                                                                                                                                                                                                                                                                                                                          |
| Keywords:                       | Maternal medicine < OBSTETRICS, EPIDEMIOLOGY, PERINATOLOGY                                                                                                                                                                                                                                                                                                                                                                                                                                                                                                                                                                                                                                                                                                                                                                                                                                                                                                                                                                                                                                                                                   |
|                                 |                                                                                                                                                                                                                                                                                                                                                                                                                                                                                                                                                                                                                                                                                                                                                                                                                                                                                                                                                                                                                                                                                                                                              |

SCHOLARONE™  
Manuscripts

1  
2  
3  
4 1 **Maternal and perinatal outcomes by planned place of birth in**  
5  
6 2 **Australia 2000 – 2012: A linked population data study**  
7  
8

9 3  
10 4 Homer, Caroline SE  
11 5 Centre for Midwifery, Child and Family Health, Faculty of Health, University of Technology  
12 6 Sydney, Sydney, Australia  
13 7 Maternal and Child Health Program, Burnet Institute, Melbourne, Australia  
14 8

15 8  
16 9 Cheah, Seong  
17 10 Centre for Midwifery, Child and Family Health, Faculty of Health, University of Technology  
18 11 Sydney, Sydney, Australia  
19 12

20 12  
21 13 Rossiter, Christine  
22 14 Centre for Midwifery, Child and Family Health, Faculty of Health, University of Technology  
23 15 Sydney, Australia  
24 16

25 16  
26 17 Dahlen, Hannah G  
27 18 School of Nursing and Midwifery, University of Western Sydney, Sydney, Australia  
28 19

29 19  
30 20 Ellwood, David  
31 21 School of Medicine, Griffith University, Queensland, Australia  
32 22

33 23 Foureur, Maralyn  
34 24 Centre for Midwifery, Child and Family Health, Faculty of Health, University of Technology  
35 25 Sydney, Australia  
36 26

37 26  
38 27 Forster, Della  
39 28 Judith Lumley Centre; Royal Women's Hospital, Maternity Services, La Trobe University,  
40 29 Melbourne, Australia  
41 30

42 30  
43 31 McLachlan, Helen L  
44 32 Judith Lumley Centre; La Trobe University, Melbourne, Australia  
45 33

46 33  
47 34 Oats, Jeremy  
48 35 Melbourne School of Population and Global Health, University of Melbourne, Melbourne,  
49 36 Australia  
50 37

51 37  
52 38 Sibbritt, David  
53 39 Faculty of Health, University of Technology Sydney, Australia  
54 40

55 40  
56 41 Thornton, Charlene  
57 42 Faculty of Medicine Nursing and Health Sciences, College of Nursing and Health Sciences  
58 43 Flinders University, Adelaide, Australia  
59 44

1  
2  
3 45 Scarf, Vanessa  
4 46 Centre for Midwifery, Child and Family Health, Faculty of Health, University of Technology  
5 47 Sydney, Australia  
6  
7 48

8 49 Corresponding author  
9 50 Professor Caroline Homer AO  
10 51 University of Technology Sydney, Australia  
11 52 T +613 8506 2454  
12 53 M +61 418 466 974  
13 54 E [caroline.homer@uts.edu.au](mailto:caroline.homer@uts.edu.au)  
14  
15 55  
16  
17  
18

19 56  
20 57 Keywords: Maternal medicine, obstetrics, epidemiology, perinatology  
21 58

22 59 Word count - excluding title page, references, figures: 5185  
23 60  
24  
25 61  
26  
27  
28  
29  
30  
31  
32  
33  
34  
35  
36  
37  
38  
39  
40  
41  
42  
43  
44  
45  
46  
47  
48  
49  
50  
51  
52  
53  
54  
55  
56  
57  
58  
59  
60

1  
2  
3 62 **ABSTRACT**  
4  
5

6 63 **Objective** – To compare perinatal and maternal outcomes for Australian women with  
7  
8 64 uncomplicated pregnancies according to planned place of birth, that is, in hospital labour  
9  
10 65 wards, birth centres or at home.

11  
12 66 **Design** – A population-based retrospective design, linking and analysing routinely collected  
13  
14 67 electronic data. Analysis comprised chi-square tests and binary logistic regression for  
15  
16 68 categorical data, yielding adjusted odds ratios. Continuous data were analysed using  
17  
18 69 ANOVA.

19  
20 70 **Setting** – All eight Australian states and territories.

21  
22  
23 71 **Participants** – Women with low-risk pregnancies who gave birth between 2000 and 2012 to  
24  
25 72 a singleton baby in cephalic presentation at between 37 and 41 completed weeks' gestation.  
26  
27 73 Of the 1 251 420 births, 1 171 703 (93.6%) were planned in hospital labour wards, 71 505  
28  
29 74 (5.7%) in birth centres and 8212 (0.7%) at home.

30  
31 75 **Main outcome measures** – Mode of birth, normal labour and birth, interventions and  
32  
33 76 procedures during labour and birth, maternal complications, admission to special care/high  
34  
35 77 dependency or intensive care units (mother or infant) and perinatal mortality (intrapartum  
36  
37 78 stillbirth and neonatal death).

38  
39 79 **Results** – Compared with planned hospital births, the odds of normal labour and birth were  
40  
41 80 over twice as high in planned birth centre births (AOR 2.72; 99% CI 2.63-2.81) and nearly six  
42  
43 81 times as high in planned home births (AOR 5.91; 99% CI 5.15-6.78). There were no  
44  
45 82 statistically significant differences in the proportion of intrapartum stillbirths, early or late  
46  
47 83 neonatal deaths between the three planned places of birth.

48  
49 84 **Conclusions** – This is the first Australia-wide study to examine outcomes by planned place of  
50  
51 85 birth. For low-risk healthy women in Australia, planned births in birth centres or at home  
52  
53 86 are associated with positive maternal outcomes although the number of homebirths was  
54  
55 87 small overall. There were no significant differences in the perinatal mortality rate, although  
56  
57 88 the absolute numbers of deaths were very small.  
58  
59  
60

## 90 ARTICLE SUMMARY

### 91 Strengths and limitations of this study

- 92 • This retrospective study reveals the first Australia-wide evidence on the relative  
93 safety of planned birth in hospital, a birth centre and at home.
- 94 • It analyses linked data on the outcomes for low-risk women and their infants in all  
95 eight Australian states and territories.
- 96 • Careful data screening eliminated most causes of obstetric complexity, resulting in  
97 three cohorts with equivalent levels of risk.
- 98 • Inconsistency between state-based datasets limited the number of confounding  
99 variables available for analysis.
- 100 • Insufficient data on changes in planned birth place prior to labour hampered  
101 identification of intrapartum transfers and analysis of the relationship between  
102 intended and actual place of birth.

### 103 Funding statement

104 This work was supported by the National Health and Medical Research Council Australia,  
105 Grant ID 1022422 (2012-2017).

### 106 Competing interest statement

107 We have read and understood *BMJ* policy on declaration of interests and declare that we  
108 have no competing interests.

### 109 Acknowledgements

110 We acknowledge and thank the data custodians in each state and territory and the data  
111 linkage units who assisted with data collection at each jurisdictional level.

### 112 Ethics approval

113 The study received initial ethical approval from the lead university's Human Research Ethics  
114 Committee (HREC) (university reference number: 2012000167) and from data custodians in  
115 each state and territory. The details are provided in a Supplementary File.

### 116 Author contribution



1  
2  
3 117 CSEH as the lead investigator was responsible for the overall leadership of the study  
4  
5 118 including the initial conception and design, grant application, ethical approval processes,  
6  
7 119 leading the project, drafting the manuscript and finalising the paper.

8  
9 120 SLC was the data analyst responsible for merging the datasets from each jurisdiction,  
10  
11 121 refining the datasets, developing the analysis codes and processes and conducting the  
12  
13 122 statistical analysis and has provided final approval of this version.

14  
15 123 CR worked with the data analyst to support data analysis and interpretation as well as  
16  
17 124 taking a key role in supporting the drafting of the manuscript and has provided final  
18  
19 125 approval of this version.

20  
21 126 HGD was involved in the initial design of the study, played a key role in developing the study  
22  
23 127 questions and data analytic processes, was involved in drafting the work and/or revising it  
24  
25 128 critically for important intellectual content and has provided final approval of this version.

26  
27 129 DAE was involved in the initial design of the study, played a key role in developing the study  
28  
29 130 questions and providing expert review, was involved in drafting the work and/or revising it  
30  
31 131 critically for important intellectual content and has provided final approval of this version.

32  
33 132 MJF was involved in the initial design of the study, played a key role in developing the study  
34  
35 133 questions and providing expert review, was involved in drafting the work and/or revising it  
36  
37 134 critically for important intellectual content and has provided final approval of this version.

38  
39 135 DF was involved in the initial design of the study, played a key role in developing the study  
40  
41 136 questions and providing expert review, was involved in drafting the work and/or revising it  
42  
43 137 critically for important intellectual content and has provided final approval of this version.

44  
45 138 HMc was involved in the initial design of the study, played a key role in developing the study  
46  
47 139 questions and providing expert review, was involved in drafting the work and/or revising it  
48  
49 140 critically for important intellectual content and has provided final approval of this version.

50  
51 141 JO was involved in the initial design of the study, played a key role in developing the study  
52  
53 142 questions and providing expert review, was involved in drafting the work and/or revising it  
54  
55 143 critically for important intellectual content and has provided final approval of this version.  
56  
57  
58  
59  
60

1  
2  
3 144 DS was involved in the initial design of the study, played a key role in developing the study  
4  
5 145 questions and analytic processes and providing expert statistical planning and review, was  
6  
7 146 involved in drafting the work and/or revising it critically for important intellectual content  
8  
9 147 and has provided final approval of this version.

10  
11 148 CT played a key role in developing the study questions and analytic plan, assisted with  
12  
13 149 planning the data set merging and cleaning of the data and providing expert epidemiological  
14  
15 150 review, was involved in drafting the work and/or revising it critically for important  
16  
17 151 intellectual content and has provided final approval of this version.

18  
19 152 VS was the project coordinator responsible for the ethical approval processes, took a key  
20  
21 153 role in coordinating the acquisition of the data from the different states and territories as  
22  
23 154 well as a lead role in planning and undertaking the analysis and interpretation, was involved  
24  
25 155 in drafting the work and/or revising it critically for important intellectual content and has  
26  
27 156 provided final approval of this version.

### 28 29 157 **Consent**

30  
31  
32 158 Individual consent by participants was deemed to not be required due to the population-  
33  
34 159 based de-identified form of the data released to the researchers.

### 35 36 160 **Data sharing statement**

37  
38  
39 161 The data that support the findings of this study are not available. It was a condition of the  
40  
41 162 agreement between the data linkage units and the researchers that the dataset remain  
42  
43 163 confidential. We are not permitted to make any part of the linked data available to any  
44  
45 164 party outside those named on the research team who have been granted access.

46  
47  
48 165  
49  
50  
51  
52  
53  
54  
55  
56  
57  
58  
59  
60

## 166 INTRODUCTION

167 In Australia, most births occur in hospitals (97.5% in 2015), with some variation across the  
168 eight states and territories (for example, 91% in the Australian Capital Territory to 99% in  
169 Victoria).<sup>1</sup> Women with uncomplicated pregnancies (those without medical or obstetric risk  
170 factors) and are planning hospital births in the public health system receive antenatal care  
171 from hospital-based midwives and doctors, sometimes within continuity of care models, and  
172 often in partnership with local general practitioners. Hospital midwives attend their labour  
173 and birth, with medical involvement as required or in line with local protocols. In the private  
174 health system (where 25% of births take place), women receive antenatal care from private  
175 obstetricians or midwives employed by obstetricians. Hospital midwives attend their labour  
176 and birth and, the obstetrician attends during the labour and is usually at the birth.<sup>2,3</sup> There  
177 are some differences across Australia in the way care is provided, especially the local  
178 guidelines and the choices available to women. The availability of different models of care  
179 varies across the country.

180 While most births take place in hospital labour wards or birth suites, a small proportion  
181 (1.8% nationally) take place in midwife-run birth centres.<sup>1</sup> These birth centres in Australia  
182 are typically co-located with hospitals (similar to alongside midwifery units in other  
183 countries) although a small number of stand-alone birth centres exist.<sup>4</sup> Birth centres  
184 typically provide midwifery continuity of care to women with uncomplicated pregnancies in  
185 a home-like environment and are well integrated into the health system.

186 Less than 0.3% of Australian births take place at home, ranging from 0.1% of births in New  
187 South Wales to 0.6% in the Northern Territory.<sup>1,5</sup> Most planned home births are attended by  
188 midwives working in private practice, some of whom also attend women in birth centres  
189 and hospitals. The integration of private homebirth services varies across the country. A  
190 small number of hospitals and birth centres offer home births through the public health  
191 system.<sup>6</sup> An evaluation of the outcomes of publicly funded models showed that the rate of  
192 stillbirth and early neonatal mortality was low, at 1.7 per 1000 births. However, the sample  
193 size did not have sufficient power to generate a conclusion about safety.<sup>7</sup>

194 We have conducted a systematic review to examine maternal and perinatal outcomes  
195 associated with planned place of birth for women with low-risk pregnancies in high-income

1  
2  
3 196 countries.<sup>8</sup> In this analysis of 28 studies from 13 countries, women who planned hospital  
4  
5 197 births had significantly higher rates of perineal trauma and instrumental/caesarean birth  
6  
7 198 than those who planned other birth places. Overall, there was no significant difference in  
8  
9 199 the odds of intrapartum stillbirth according to place of birth (compared with planned  
10  
11 200 hospital births, planned homebirth: OR=0.94; 95% CI: 0.76-1.17; planned birth centre  
12  
13 201 OR=0.66; 95% CI: 0.32-1.34) or in early neonatal deaths (planned home birth OR=1.00; 95%  
14  
15 202 CI: 0.78-1.27; planned birth centre 1.08; 95% CI: 0.42-2.78).

16  
17 203 Previous Australian state-based studies into place of birth have showed variation in findings.  
18  
19 204 In New South Wales (the most populous state accounting for around 30.9% of births)<sup>9</sup>,  
20  
21 205 women without pregnancy complications who planned a home or birth centre birth had  
22  
23 206 significantly higher proportions of normal birth than those planning hospital births (home  
24  
25 207 97.4% vs birth centre 86.0% vs hospital 73.9%). There was no significant difference in  
26  
27 208 neonatal mortality although the overall sample size (n= 258 161, including only 742 planned  
28  
29 209 home births), had insufficient power for these relatively rare outcomes. In South Australia  
30  
31 210 (SA) (297 192 planned hospital births and 1141 [0.38%] planned home births), another study  
32  
33 211 found lower intervention rates and equivalent perinatal death rates in home births  
34  
35 212 compared to hospital births. However, the odds of an intrapartum fetal death were  
36  
37 213 significantly higher among planned home births (two deaths in the planned home birth  
38  
39 214 group; AOR 7.42; 95% CI: 1.53–35.87). This study included some women with recognised risk  
40  
41 215 factors in the home birth group including twins.<sup>10</sup> Large-scale studies in other countries  
42  
43 216 mostly showing similar perinatal outcomes between births planned at home and in hospitals  
44  
45 217 (and birth centres where these exist) with some differences for primiparous women.<sup>11-14</sup>

46  
47 218 There is less controversy about birth centres. Data from Australian birth centres indicate  
48  
49 219 lower rates of maternal morbidity,<sup>15</sup> intervention, preterm birth and low birthweight  
50  
51 220 compared with hospital births for women with similar low-risk profiles.<sup>16</sup> One study  
52  
53 221 identified no significant differences by birth place in perinatal mortality<sup>16</sup> and another  
54  
55 222 reported lower perinatal mortality in birth centre births, although based on actual rather  
56  
57 223 than intended birth place.<sup>17</sup> A smaller hospital-based study found no significant difference in  
58  
59 224 caesarean section rates between the birth centre and labour ward for women with low-risk  
60  
225 pregnancies.<sup>18</sup> Two other birth centre studies reported higher rates of spontaneous vaginal

1  
2  
3 226 birth and lower rates of adverse infant outcomes (neonatal intensive care unit [NICU]  
4 admission, low birthweight) compared to hospital births.<sup>19,20</sup>  
5  
6

7  
8 228 The safety of place of birth continues to be questioned in Australia.<sup>21</sup> To generate evidence  
9  
10 229 to assist policy makers, health practitioners, and pregnant women and their families to  
11  
12 230 make informed decisions about place of birth, we undertook a national study combining  
13  
14 231 data from all eight Australian jurisdictions to examine the outcomes for women with low-  
15  
16 232 risk pregnancies related to three different birth settings. This is the first national study on  
17  
18 233 the comparative safety of different planned birth settings in Australia.

### 19 234 **Aim and objectives**

20  
21  
22 235 The study aimed to compare the perinatal and maternal outcomes for Australian women  
23  
24 236 with uncomplicated pregnancies according to planned place of birth, that is, hospital labour  
25  
26 237 wards, birth centres or at home. We defined *uncomplicated pregnancy* as a singleton fetus  
27  
28 238 in cephalic presentation between 37 and 41 completed weeks' gestation and free of known  
29  
30 239 and recorded complications. Exclusions are detailed in Box 1.

31  
32 240 The objectives were to compare the three planned places of birth by:

- 33  
34  
35 241 • Mode of birth, rate of normal labour and birth, augmentation, analgesia during  
36  
37 242 labour and episiotomy  
38  
39 243 • Postpartum complications including postpartum haemorrhage, perineal trauma,  
40  
41 244 admission to an intensive care or high dependency unit and readmission to hospital  
42  
43 245 within 28 days. Women who gave birth at home and required transfer to hospital  
44  
45 246 either during labour or after the birth are counted as an admission.  
46  
47 247 • Intrapartum stillbirth or neonatal deaths  
48

49 248

## 50 51 249 **METHODS**

### 52 53 54 250 **Study design**

55  
56  
57 251 The study used a population-based retrospective design, linking and analysing routinely  
58  
59 252 collected electronic data from multiple sources about births between 2000 and 2012 to  
60

1  
2  
3 253 women with low-risk pregnancies. We compared outcomes from three cohorts comprising  
4  
5 254 women who were as comparable as possible given the available data. In Australia,  
6  
7 255 homebirth and birth centre options are mostly restricted to women who meet low-risk  
8  
9 256 criteria, that is, have an uncomplicated pregnancy and no relevant past medical or obstetric  
10  
11 257 history. We therefore endeavoured to ensure that the hospital cohort shared the same  
12  
13 258 characteristics, clinically if not demographically and applied the same filters on all three  
14  
15 259 cohorts to increase the similarity between groups.

16  
17 260 The study was approved by a university Human Research Ethics Committee (HREC). HRECs in  
18  
19 261 each state and territory also approved access to anonymised linked data (see  
20  
21 262 Supplementary File 1).

### 22 23 263 **Patient and Public Involvement**

24  
25  
26 264 Patients and the public were not involved in the design or conduct of the study.

### 27 28 265 **Data sources**

29  
30  
31 266 All eight Australian states and territories compile electronic perinatal datasets with items on  
32  
33 267 maternal characteristics, labour, birth, and perinatal outcomes in the immediate  
34  
35 268 postpartum period, that is, during the birth admission. However, to eliminate women with  
36  
37 269 conditions that made them fall out of the uncomplicated criteria from the sample and to  
38  
39 270 examine deaths and major morbidity requiring hospitalisation beyond the perinatal period,  
40  
41 271 we examined additional data sources on deaths and hospital admissions nine months before  
42  
43 272 and twelve months following birth. This study used linked anonymous data on all available  
44  
45 273 mothers and infants from the following sources:

- 46 274 • *Perinatal Data Collection (PDC)* – maternal and infant data on all live births and  
47  
48 275 stillbirths from 20 weeks' gestation or >400g birth weight;
  - 49 276 • *Admitted Patient Data Collection (APDC)* – services provided to all individuals  
50  
51 277 admitted to public and private hospitals, using the International Classification of  
52  
53 278 Diseases – Australian modifications (ICD-10-AM)<sup>22</sup> for clinical data;
  - 54  
55 279 • *Registry of Births, Deaths and Marriages (RBDM)* – all registered births and deaths;
  - 56  
57 280 • *Australian Bureau of Statistics (ABS)* – data on deaths including primary cause of  
58  
59 281 death (only for NSW and Queensland).
- 60

1  
2  
3 282 It was not possible to obtain data from all sources for all states and territories for the full  
4  
5 283 study period due to differences in data collection systems. Table footnotes indicate the  
6  
7 284 scope of data for each variable. In addition, not all states and territories provided data on  
8  
9 285 maternal mortality.

## 10 11 286 **Definitions**

12  
13  
14 287 The definition of *uncomplicated pregnancies* (those without medical or obstetric risk  
15  
16 288 factors) was determined a priori by the research team. For the most part, this used the  
17  
18 289 Australian College of Midwives Guidelines for Consultation and Referral<sup>23</sup> as a basis for the  
19  
20 290 description of uncomplicated pregnancies.

21  
22 291 < Insert Box 1 here >

23  
24  
25 292 *Planned place of birth* incorporates three possible locations: home, birth centre, and  
26  
27 293 hospital. *Homebirths* are instances where women intend to give birth outside a formal  
28  
29 294 health facility, usually their own home, and receive care from a registered midwife, funded  
30  
31 295 through either the public or private health system or self-funded. *Birth centres* provide a  
32  
33 296 home-like birth setting and are run by midwives. They can be located within a hospital  
34  
35 297 campus (alongside unit) or in a separate area (stand-alone unit) and require transfer to the  
36  
37 298 main hospital service for access to interventions such as epidural analgesia or caesarean  
38  
39 299 section. *Hospital births* take place in the labour ward or birth suite (terms vary across the  
40  
41 300 country) of either a public or private hospital, and women are attended by midwives,  
42  
43 301 obstetricians and/or general practitioner (GP) obstetricians.

44 302 The timing of the decision about birth setting is critical within the birthplace literature.  
45  
46 303 While women choose a birth location early in their pregnancy, clinical factors may preclude  
47  
48 304 them from achieving this intention. If they develop complications, they may no longer be  
49  
50 305 eligible to give birth in a birth centre or at home. These women are excluded from  
51  
52 306 comparisons of outcome by birth setting if they transfer to hospital care prior to labour.  
53  
54 307 Ideally, researchers should identify planned place of birth at labour onset, to ensure that all  
55  
56 308 participants have a similar level of clinical complexity. All Australian data collections record  
57  
58 309 intended place of birth, but the majority did not indicate intention at labour onset.  
59  
60 310 Therefore, the current study analyses data on planned place of birth identified at an



1  
2  
3 311 undetermined time in the pregnancy, as close to labour as we were able to identify. The  
4  
5 312 screening process eliminated women with many of the risk factors that would have  
6  
7 313 prompted antenatal transfer from a birth centre or homebirth.  
8

9 314 Box 2 provides the definitions of the maternal and perinatal outcomes.  
10

11  
12 315 < Insert Box 2 here >  
13  
14

### 15 316 **Data linkage**

16  
17 317 Independent data linkage units (DLU) in each state and territory matched information from  
18  
19 318 the four data sources (where available), using probabilistic linkage techniques.<sup>24,25</sup> This  
20  
21 319 generated de-identified health records linking information from multiple datasets about the  
22  
23 320 same individuals. This process yields the best available data on maternal and infant health  
24  
25 321 status. However, it is not infallible and has estimated false positive and false negative rates  
26  
27 322 of 0.5% each.<sup>26</sup>  
28

29 323 Cross-jurisdictional data linkage was not possible, as independent DLUs had diverging  
30  
31 324 protocols for maintaining patient privacy. We therefore applied to the individual data  
32  
33 325 custodians for access to the linked data, through the six DLUs (data linkage for the  
34  
35 326 Australian Capital Territory and the Northern Territory is provided by NSW and SA units  
36  
37 327 respectively). Data were combined on relevant variables, where comparable, into a national  
38  
39 328 dataset. Box 3 provides details on the datasets. Our approach to the data linkages and  
40  
41 329 combining issues are detailed elsewhere.<sup>27</sup>  
42

43 330 < Insert Box 3 here >  
44  
45

### 46 331 **Data cleaning, screening and cohort selection**

47  
48 332 Because the data collections were developed separately in each state and territory (except  
49  
50 333 ABS collections), they had different characteristics and components. In particular, several  
51  
52 334 PDC and APDC variables differed in name and type by jurisdiction. Even within the same  
53  
54 335 state, some variable definitions changed over the study period, with items merged or split  
55  
56 336 into multiple variables over time. The researchers scrutinised definitions to ensure accurate  
57  
58 337 matching between variables with different names and attributes into a standardised  
59  
60



1  
2  
3 338 dataset. The variables on mode of birth and intervention are all as defined by each state or  
4  
5 339 territory.

6  
7  
8 340 Our broad request to state DLUs specified data on women with singleton pregnancies and a  
9  
10 341 cephalic presentation at 37 to 41 completed weeks' gestation. Datasets arrived in different  
11  
12 342 formats and met our low-risk criteria to varying extents. We then applied more specific  
13  
14 343 inclusion and exclusion criteria (Box 1) to generate the low-risk sample.

#### 15 16 344 **Data analysis**

17  
18 345 Data were converted to SPSS Version 24, then grouped according to women's planned place  
19  
20 346 of birth for intention to treat analysis. Descriptive statistics were generated and reported  
21  
22 347 using percentages (or incidence per 1000 births for postpartum complications and perinatal  
23  
24 348 outcomes). Categorical variables were initially compared using chi-square tests, followed by  
25  
26 349 odds ratios from binary logistic regression adjusted for maternal age, maternal country of  
27  
28 350 birth (Australia or elsewhere), gestational age and parity (dichotomised as primiparous vs  
29  
30 351 multiparous) (adjusted odds ratio=AOR). These confounders were decided *a priori* based on  
31  
32 352 what is known in the literature to affect outcomes. For simplicity, percentages were  
33  
34 353 computed for the incidence of events at each birth setting. Unfortunately, state and  
35  
36 354 territory-based data collections have inconsistent variables on other potential demographic  
37  
38 355 factors such as maternal education, socioeconomic status or body mass index, limiting the  
39  
40 356 variables available for controlling the analysis. We present analysis stratified by parity (first  
41  
42 357 baby versus other) for normal labour and birth and perinatal mortality. For continuous data  
43  
44 358 such as maternal age and gestation week, we used univariate general linear model for  
45  
46 359 analysis of variance (ANOVA) to examine the differences between the means.

47 360 No imputation was made to missing data. All calculations in regression and rates were  
48  
49 361 computed based on non-missing data. Wherever necessary, sizes of missing data (not  
50  
51 362 stated/inadequately described) on related variables were reported. The analysis reports  
52  
53 363 99% confidence intervals. The statistical significance level was set at  $p < 0.01$  to have more  
54  
55 364 precision due to the large sample size. Ethics approval requirements prevented us reporting  
56  
57 365 cell sizes of less than five to maintain confidentiality. Further details on the methods is  
58  
59 366 presented elsewhere.<sup>27</sup>  
60

## 367 RESULTS

### 368 Demographic characteristics

369 The sample comprised 1 251 420 births that occurred between 1 January 2000 and 31  
370 December 2012 to women with full-term, singleton pregnancies without complications. Of  
371 these, 1 171 703 (93.6%) births were planned in hospital labour wards (referred to as  
372 'hospital' births), 71 505 (5.7%) in a birth centre and 8212 (0.7%) at home.

373 Women planning to give birth in hospital labour wards were more likely to be younger,  
374 primiparous, of a shorter gestation (less than 40 weeks) or non-Australian-born than those  
375 planning birth centre or home births (Table 1).

376 <Insert Table 1 here>

### 377 Mode of birth, intervention and analgesia by planned place of birth

378 Planned birth at home or in a birth centre was associated with normal labour and birth  
379 more often than planned hospital birth. Women planning a birth centre birth were almost  
380 three times as likely (AOR 2.72, 99% CI 2.63-2.81) and women planning a home birth were  
381 almost six times as likely (AOR 5.91, 99% CI 5.15-6.78) to have a normal birth (Table 2). The  
382 odds for primiparous and multiparous women were similar. Overall, the proportion of  
383 women having a normal labour and birth were high (79% to 95% across the groups).

384 <Insert Table 2 here>

385 Women planning hospital births were more likely to experience interventions in birth.  
386 Compared with planned hospital births, births planned in other settings had significantly  
387 lower odds of: vacuum extraction (birth centre AOR 0.42; 99% CI 0.40-0.44 and homebirth  
388 AOR 0.18; 99% CI 0.14-0.24), forceps (birth centre AOR 0.54; 99% CI 0.50-0.58 and  
389 homebirth AOR 0.21; 99% CI 0.14-0.31) and intrapartum caesarean section (birth centre  
390 AOR 0.45; 99% CI 0.43-0.48 and homebirth AOR 0.29; 99% CI 0.24-0.35). Overall, the rates of  
391 interventions in the whole cohort were low with a rate of intrapartum caesarean section of  
392 only 8%.

1  
2  
3 393 Women who planned a birth centre or home birth were significantly more likely to have an  
4  
5 394 intact perineum (birth centre AOR 1.16; 99% CI 1.14-1.19 and homebirth AOR 2.07; 99% CI  
6  
7 395 1.95-2.20) than those planning a hospital birth. Compared with planned hospital births, 3<sup>rd</sup>  
8  
9 396 or 4<sup>th</sup> degree perineal tears were less likely in planned home births (AOR 0.53; 99% CI 0.39-  
10  
11 397 0.73) and more likely in planned birth centre births (AOR 1.17; 99% CI 1.09-1.25). The odds  
12  
13 398 of episiotomy were much lower in both non-hospital groups (birth centre AOR 0.37; 99% CI  
14  
15 399 0.36-0.39 and homebirth AOR 0.13; 99% CI 0.10-0.15) than in planned hospital births. The  
16  
17 400 odds of other interventions such as oxytocin augmentation and epidural or spinal analgesia  
18  
19 401 were lower in planned birth centre or home births (Table 3).

20  
21 402 <Insert Table 3 here>

### 22 23 403 **Maternal postpartum complications**

24  
25  
26 404 Women who planned to give birth in a birth centre were less likely to have a PPH requiring a  
27  
28 405 blood transfusion than women who planned hospital births (AOR 0.66; 99% CI 0.56-0.78).  
29  
30 406 There was no significant difference in the odds for women who planned a home birth (AOR  
31  
32 407 1.08; 99% CI 0.73-1.60). The odds for admission to an intensive care or a high dependency  
33  
34 408 unit were lower for the planned birth centre group (AOR 0.42; 99% CI 0.31-0.56) but no  
35  
36 409 different for the planned home birth group (AOR 0.41; 99% CI 0.15-1.08). However, the  
37  
38 410 absolute number of admissions is small (Table 4). There were no significant differences  
39  
40 411 between the groups in the odds of readmission to hospital within a month.

41  
42 412 <Insert Table 4 here>

### 43 44 413 **Perinatal outcomes by planned place of birth**

45  
46  
47 414 There were no significant differences in the odds of intrapartum stillbirth, or early or late  
48  
49 415 neonatal deaths between the three planned places of birth. Combined data on stillbirth  
50  
51 416 during labour, early and late neonatal death indicate that women planning a home birth  
52  
53 417 were no more likely to experience perinatal mortality than those planning a hospital birth  
54  
55 418 (AOR 1.55; 99% CI 0.65-3.69), although the absolute number of deaths was very small  
56  
57 419 (9/8182). Similarly, there was no significant difference for women planning a birth centre  
58  
59 420 birth (AOR 0.84; 99% CI 0.60-1.19). When women were stratified by parity, there were no  
60  
61 421 significant differences between any of the groups in the odds of perinatal mortality.

1  
2  
3 422 Women who planned a birth centre birth were more likely to have their baby admitted to  
4 423 the NICU and/or SCU for longer than 48 hours (AOR 1.24; 99% CI 1.10-1.39) than women  
5 424 who planned hospital births. This trend was not seen in planned home births (AOR 0.63;  
6 425 99% CI 0.39-1.01). There were no significant differences between the three groups in the  
7 426 odds of readmission of the baby to hospital within 28 days (Table 5).

8  
9  
10  
11  
12  
13 427 <Insert Table 5 here>

## 14 15 16 428 **DISCUSSION**

17  
18 429 This study, the first in Australia, has examined maternal and perinatal outcomes nationally  
19 430 by planned place of birth including all eight states and territories. Our study has  
20 431 demonstrated results consistent with several international studies of planned place of  
21 432 birth.<sup>11,12,14</sup> Normal births were more likely for women who planned birth in birth centres or  
22 433 at home than in a hospital. Women who planned to give birth at home were slightly older  
23 434 than women planning hospital or birth centre births, but despite this, had consistently lower  
24 435 rates of intervention.

25  
26 436 The unadjusted perinatal mortality ratio for planned hospital births was 0.8 per 1000 live  
27 437 births compared with 0.4 in planned birth centre births and 1.1 in planned home births,  
28 438 although the absolute risks were very small with low numbers of deaths overall. These  
29 439 differences by place of birth were neither statistically significant for all women nor for  
30 440 cohorts stratified by parity. However, the differences are more marked in primiparous  
31 441 women (0.8 per 1000 in planned hospital vs 1.7 per 1000 in planned homebirth) than  
32 442 multiparous women (0.7 per 1000 in planned hospital vs 0.8 per 1000 in planned  
33 443 homebirth). Given the small number of deaths in the planned homebirth group (n=9) this  
34 444 may be a chance finding over a long period of time (13 years). However, it is similar the  
35 445 combined perinatal outcome in the Birthplace in England study<sup>11</sup>, although that study did  
36 446 find statistically significant higher odds of a composite of perinatal mortality and selected  
37 447 early neonatal morbidities among primiparous women planning home births. This highlights  
38 448 the need to explain the risks to women in absolute terms, as this is likely to be more helpful  
39 449 in assisting decision-making.

40  
41  
42  
43  
44  
45  
46  
47  
48  
49  
50  
51  
52  
53  
54  
55  
56  
57  
58  
59  
60

1  
2  
3 450 There were two negative findings in relation to birth centre outcomes, firstly, a significantly  
4 451 higher rate of severe perineal trauma (AOR 1.17; 99% CI 1.09-1.25) compared with planned  
5 452 hospital births. Another Australian study<sup>16</sup> and one in New Zealand also found higher rates  
6  
7 453 of perineal trauma in birth centres.<sup>28</sup> However, other research found no significant  
8  
9 454 differences in perineal outcomes for example in studies in Norway,<sup>29,30</sup> Denmark,<sup>31</sup>  
10  
11 455 Australia<sup>32</sup> or England.<sup>33</sup> The higher rate of severe perineal trauma may be related to the use  
12  
13 456 of birth stools, more common in Australian birth centres but less frequently in hospitals or  
14  
15 457 at home. Birth stools have been linked to higher rates of severe perineal trauma compared  
16  
17 458 with other birth positions or waterbirth.<sup>34</sup> The higher rates of trauma could be due to better  
18  
19 459 case ascertainment or lower rates of episiotomy.

20  
21  
22 460 The study also found higher rates of infant admission to NICU/SCN for greater than 48 hours  
23  
24 461 (AOR 1.24; 99% CI 1.10-1.39) among planned birth centre births. This is different from other  
25  
26 462 research, which either found higher rates associated with planned hospital births<sup>16,28</sup> or else  
27  
28 463 no statistically significant differences in NICU admission rates from birth centres and  
29  
30 464 hospital births.<sup>29,31,35</sup> The admissions to the NICU or SCN in the current study are low in  
31  
32 465 absolute terms (1 per 100 for birth centre births) but higher than planned hospital births.  
33  
34 466 This requires ongoing examination to determine possible reasons and ways to reduce the  
35  
36 467 rate.

### 37 38 468 **Strengths and limitations**

39  
40  
41 469 This study is the first to comprehensively examine maternal and perinatal outcomes from  
42  
43 470 three birth settings across Australia. It used a population-based sample consisting of women  
44  
45 471 with low-risk pregnancies. The large sample size was sufficient to detect differences  
46  
47 472 between the three groups, although the numbers of homebirth nationally, even over this  
48  
49 473 time period, were comparatively small (i.e. 8212 only 0.7% of the total low-risk sample).

50  
51 474 The context of homebirth in Australia means there are still low numbers of women choosing  
52  
53 475 homebirth and hence small numbers in this population. Private practising midwives do not  
54  
55 476 have access to professional indemnity insurance which means the option for women is  
56  
57 477 limited although still available in some parts of the country. Some private practising  
58  
59 478 midwives in some states have visiting rights to hospitals but this is not universal leading to a  
60  
479 lack of potential lack of integration. The publicly funded home birth models are relatively

1  
2  
3 480 few (no more than 20 services across the country) and cater for small numbers of women.  
4  
5 481 The policy and professional context has not been highly supportive of homebirth which has  
6  
7 482 made scaling up of public services difficult.  
8

9 483 Women with uncomplicated pregnancies were defined consistently across all three cohorts  
10  
11 484 in the dataset. However, merging linked data from multiple jurisdictions created several  
12  
13 485 challenges and potential shortcomings, including missing responses, inconsistent variable  
14  
15 486 definitions and limited data from some states.<sup>27</sup> For example, Queensland's data collection  
16  
17 487 only covered 2007-2012, resulting in under-representation: 9.6% of the combined sample,  
18  
19 488 compared with 20.4% of Australian births in 2012.<sup>36</sup> The linked data sets also could not  
20  
21 489 account for women who may have moved to another state or territory in the follow-up time  
22  
23 490 frame.

24  
25 491 Although we eliminated unintended home births among women intending hospital or birth  
26  
27 492 centre births (births before arrival), the home birth data do not always record whether or  
28  
29 493 not a qualified health professional attended. Within the constraints of the data available, we  
30  
31 494 have only included births attended by a health professional. Moreover, different states  
32  
33 495 recorded birthplace intentions at different times. Although this means that intended birth  
34  
35 496 place is not always recorded at onset of labour, the scrupulous process of data cleaning and  
36  
37 497 categorising eliminated most women with risk factors which would have rendered them  
38  
39 498 ineligible for birth centre or home births. Thus, the recorded birthplace intention was as  
40  
41 499 close as possible to that at labour onset. However, there is a possibility that some planned  
42  
43 500 birth centre/home births were erroneously classified as planned hospital births.

44 501 Some data items were collected inconsistently across the jurisdictions, for example, transfer  
45  
46 502 from home to hospital after the onset of labour. This was either because the data item did  
47  
48 503 not exist or because it only recorded 'transfer', which could have been at any time during  
49  
50 504 pregnancy. Therefore, we were unable to report on intrapartum transfer rates.

51  
52 505 Inconsistencies in the data from different jurisdictions also affected the data analysis. The  
53  
54 506 regression analysis incorporated very few potential confounders, limited to those for which  
55  
56 507 consistent data were available nation-wide (i.e. maternal age, gestational age, parity and  
57  
58 508 whether born in Australia or not). Socio-economic status is also inconsistently collected  
59  
60

1  
2  
3 509 across the country, as is maternal BMI and education, so we were unable to adjust for these  
4  
5 510 factors.  
6  
7

8 511 It is possible, despite our best efforts to reduce selection bias is that there remains some  
9  
10 512 residual confounding especially given the small numbers of women planning a homebirth. It  
11  
12 513 is likely that women planning to give birth in a birth centre or at home, are likely to be  
13  
14 514 different from those planning a hospital birth in a number of ways, including their attitudes  
15  
16 515 to intervention and approach to birth. These are not able to be measured but may impact  
17  
18 516 on the findings in relation to interventions and outcomes.  
19

## 20 517 **CONCLUSION**

21  
22 518 This study provides evidence on the safety of births planned in hospital, birth centre and at  
23  
24 519 home across all states and territories in Australia by comparing cohorts of women with low-  
25  
26 520 risk pregnancies. Inconsistencies between state-based datasets as described limited the  
27  
28 521 number of variables available for analysis. However, for healthy women with low-risk  
29  
30 522 pregnancies, planned birth centre births resulted in high rates of normal labour and birth,  
31  
32 523 low rates of most maternal complications, and comparable perinatal mortality outcomes.  
33  
34 524 Women planning home birth also had similarly positive maternal outcomes with no  
35  
36 525 statistically significant differences in the rate of perinatal mortality or NICU admission. In  
37  
38 526 absolute terms, the numbers of deaths were small, although the rate of perinatal mortality  
39  
40 527 was higher among primiparous women who planned homebirths than their multiparous  
41  
42 528 counterparts.  
43

44 529  
45  
46  
47  
48  
49  
50  
51  
52  
53  
54  
55  
56  
57  
58  
59  
60



530 **Box 1: Exclusion criteria**

Women were excluded if the baby was:

- Born before 37 and after 41 completed weeks' gestation;
- Born before arrival for a planned birth at hospital or birth centre;
- Diagnosed antenatally with a congenital abnormality (all ICD-10-AM Q codes)

Women were also excluded if they had:

- Received no antenatal care;
- A previous caesarean section;
- A breech or non-vertex presentation;
- Labour induced for any reason;
- An elective caesarean section (pre-labour);
- Pre-existing (essential) and/or pregnancy-related hypertension;
- Pre-existing or gestational diabetes;
- Antepartum haemorrhage or any other relevant pregnancy complications
- ICD-10-AM Diagnosis
  - O10 Pre-existing hypertension complicating pregnancy, childbirth and the puerperium
  - O11 Pre-eclampsia superimposed on chronic hypertension
  - O13 Gestational [pregnancy-induced] hypertension
  - O14 Pre-eclampsia
  - O15 Eclampsia
  - O24 Diabetes mellitus in pregnancy
  - O30 Multiple gestation
  - O31.2 Continuing pregnancy after intrauterine death of one fetus or more
  - O36.4 Maternal care for intrauterine death
  - O42 Premature rupture of membranes
  - O46 Antepartum haemorrhage
  - O75.5 Delayed delivery after artificial rupture of membranes
  - O75.7 Vaginal delivery following previous caesarean section
  - P95 Fetal death of unspecified cause

531



1  
2  
3 532 **Box 2: Maternal and perinatal outcomes**  
4  
5

6 *Maternal outcomes* include mode of birth, interventions and procedures during labour  
7 and birth (episiotomy, epidural or spinal analgesia, oxytocin augmentation) and perineal  
8 status.  
9

10  
11 *Mode of birth* includes caesarean section, forceps birth, vacuum extraction, and normal  
12 vaginal birth (non-instrumental).  
13

14  
15 *Normal labour and birth* is defined as spontaneous labour, cephalic presentation, without  
16 epidural, spinal or general anaesthesia, forceps, vacuum extraction, episiotomy or  
17 caesarean section.  
18

19  
20 *Postpartum complications* were severe perineal trauma (3<sup>rd</sup> or 4<sup>th</sup> degree tear),  
21 postpartum haemorrhage (PPH) requiring a transfusion, admission to intensive care or  
22 high dependency unit for more than 48 hours and hospital readmission within 28 days.  
23

24  
25 *Perinatal outcomes* include intrapartum stillbirth, early neonatal death (0-7 days), late  
26 neonatal death (8-28 days), admission to special care or neonatal intensive care unit  
27 (NICU) for more than 48 hours and readmission to hospital within 28 days. We also  
28 stratified combined perinatal mortality data by parity. Combined perinatal loss included  
29 stillbirth during labour, early and late neonatal death.  
30  
31  
32  
33  
34  
35  
36

37 533

38  
39 534

40  
41  
42 535  
43  
44  
45  
46  
47  
48  
49  
50  
51  
52  
53  
54  
55  
56  
57  
58  
59  
60

**Box 3: Proportion of births included in sample, by state and territory**

| State or Territory                                          | NSW       | QLD       | VIC       | SA        | WA        | TAS       | ACT       | NT        | Total     |
|-------------------------------------------------------------|-----------|-----------|-----------|-----------|-----------|-----------|-----------|-----------|-----------|
| Years of data provided                                      | 2000-2012 | 2007-2012 | 2000-2012 | 2000-2012 | 2000-2012 | 2005-2012 | 2000-2012 | 2000-2012 |           |
| Number of births which met low-risk criteria for this study | 507 017   | 114 245   | 370 356   | 69 356    | 130 848   | 19 915    | 23 484    | 16 199    | 1 251 420 |
| Proportion of total study sample                            | 40.5%     | 9.1%      | 29.6%     | 5.5%      | 10.5%     | 1.6%      | 1.9%      | 1.3%      | 100%      |

Key to the states and territories: NSW - New South Wales; Qld - Queensland, VIC – Victoria; SA – South Australia; WA – Western Australia; TAS – Tasmania; ACT – Australian Capital Territory; NT – Northern Territory

Table 1: Demographic characteristics by planned place of birth

|                                         | Hospital                     | Birth Centre             | Home                   |
|-----------------------------------------|------------------------------|--------------------------|------------------------|
| <b>All women</b>                        | <b>1 171 703<br/>(93.6%)</b> | <b>71 505<br/>(5.7%)</b> | <b>8212<br/>(0.7%)</b> |
| <b>Maternal age (years) - mean (sd)</b> | 29.0 (5.6)                   | 29.8 (5.3)               | 31.8 (5.0)             |
| <b>Maternal age (years)</b>             |                              |                          |                        |
| <20                                     | 61 451 (5.2%)                | 2044 (2.9%)              | 71 (0.9%)              |
| 20-24                                   | 200 386 (17.1%)              | 10 116 (14.1%)           | 548 (6.7%)             |
| 25-29                                   | 348 785 (29.8%)              | 21 579 (30.2%)           | 2047 (24.9%)           |
| 30-34                                   | 365 022 (31.2%)              | 23 949 (33.5%)           | 3058 (37.2%)           |
| 35-39                                   | 167 803 (14.3%)              | 11 931 (16.7%)           | 1997 (24.3%)           |
| ≥40                                     | 28 177 (2.4%)                | 1886 (2.6%)              | 474 (5.8%)             |
| Missing                                 | 79 (0.0%)                    | 0 (0.0%)                 | 17 (0.2%)              |
| <b>Previous pregnancies (≥20weeks)</b>  |                              |                          |                        |
| 0                                       | 494 019 (42.2%)              | 28 891 (40.4%)           | 2295 (27.9%)           |
| 1                                       | 376 047 (32.1%)              | 25 079 (35.1%)           | 2745 (33.4%)           |
| 2                                       | 174 873 (14.9%)              | 11 364 (15.9%)           | 1688 (20.6%)           |
| ≥3                                      | 126 111 (10.8%)              | 6153 (8.6%)              | 1456 (17.7%)           |
| Not stated                              | 653 (0.1%)                   | 18 (0.0%)                | 28 (0.3%)              |
| <b>Gestation* - mean (sd)</b>           | 39.5 (1.0)                   | 39.6 (1.0)               | 39.8 (1.0)             |
| <b>Gestation*</b>                       |                              |                          |                        |
| 37                                      | 54 825 (4.7%)                | 2403 (3.4%)              | 209 (2.5%)             |
| 38                                      | 155 764 (13.3%)              | 7470 (10.4%)             | 724 (8.8%)             |
| 39                                      | 323 179 (27.6%)              | 18 278 (25.6%)           | 1666 (20.3%)           |
| 40                                      | 481 665 (41.1%)              | 29 289 (41.0%)           | 3779 (46.0%)           |
| 41                                      | 156 270 (13.3%)              | 14 065 (19.7%)           | 1834 (22.3%)           |

| <b>Maternal country of birth</b>  |                 |                |              |
|-----------------------------------|-----------------|----------------|--------------|
| Australia                         | 889 550 (75.9%) | 56 201 (78.6%) | 6822 (83.1%) |
| Others                            | 276 001 (23.6%) | 15 105 (21.1%) | 1188 (14.5%) |
| Inadequately described/not stated | 6152 (0.5%)     | 199 (0.3%)     | 202 (2.5%)   |

\*Gestation is in completed weeks

Note: Chi-square tests on categorical data within each sub-heading between birth settings yielded statistically significant differences with  $p < 0.001$  in all categories with no missing or not stated data. GLM revealed significant differences at  $p < 0.0001$  between means in all pairwise comparisons.

Percentages may not total exactly 100% due to rounding.

**Table 2: Normal labour and birth<sup>†</sup> by planned place of birth and parity**

| Planned place of birth                | No. events – normal labour and birth <sup>†</sup> | Total number of births | Incidence of events (%) | Unadjusted OR    | Adjusted OR <sup>Æ</sup> |
|---------------------------------------|---------------------------------------------------|------------------------|-------------------------|------------------|--------------------------|
| <b>All women</b>                      | 991 534                                           | 1 250 721              | 79.3                    |                  |                          |
| Hospital                              | 919 974                                           | 1 171 050              | 78.6                    | 1                | 1                        |
| Birth Centre                          | 63 773                                            | 71 487                 | 89.2                    | 2.26 (2.19-2.33) | 2.72 (2.63-2.81)         |
| Home                                  | 7787                                              | 8184                   | 95.1                    | 5.35 (4.69-6.11) | 5.91 (5.15-6.78)         |
| <b>Primiparous women<sup>^^</sup></b> | 322 640                                           | 525 205                | 61.4                    |                  |                          |
| Hospital                              | 298 243                                           | 494 019                | 60.4                    | 1                | 1                        |
| Birth Centre                          | 22 401                                            | 28 891                 | 77.5                    | 2.27 (2.18-2.35) | 2.60 (2.50-2.70)         |
| Home                                  | 1996                                              | 2295                   | 87.0                    | 4.38 (3.73-5.14) | 5.99 (5.09-7.04)         |
| <b>Multiparous women<sup>^^</sup></b> | 668 894                                           | 725 516                | 92.2                    |                  |                          |
| Hospital                              | 621 731                                           | 677 031                | 91.8                    | 1                | 1                        |
| Birth Centre                          | 41 372                                            | 42 596                 | 97.1                    | 3.01 (2.79-3.24) | 3.27 (3.03-3.53)         |
| Home                                  | 5791                                              | 5889                   | 98.3                    | 5.26 (4.04-6.83) | 5.86 (4.50-7.62)         |

<sup>Æ</sup> Logistic regression adjusted for maternal age, country of birth, gestational age and parity at 99% CI.

<sup>†</sup> Normal labour and birth – spontaneous labour, no epidural or spinal, general anaesthesia, forceps, vacuum extraction, episiotomy or caesarean section.

<sup>^^</sup> Parity refers to previous pregnancies >20 weeks and is dichotomised.

Cases with missing data were not included in rates or regression calculations

**Table 3: Mode of birth and intervention rates by planned place of birth**

| Intervention and planned place of birth                        | No. of events | No of births | Incidence of events (%) | Unadjusted OR    | Adjusted OR <sup>AE</sup> |
|----------------------------------------------------------------|---------------|--------------|-------------------------|------------------|---------------------------|
| <b>Normal vaginal birth</b>                                    | 992 118       | 1 251 420    | 79.3                    |                  |                           |
| Hospital                                                       | 920 514       | 1 171 703    | 78.6                    | 1                | 1                         |
| Birth Centre                                                   | 63 790        | 71 505       | 89.2                    | 2.26 (2.19-2.33) | 2.72 (2.63-2.81)          |
| Home                                                           | 7814          | 8212         | 95.2                    | 5.36 (4.69-6.12) | 5.91 (5.15-6.78)          |
| <b>Vacuum extraction</b>                                       | 88 586        | 1 251 420    | 7.1                     |                  |                           |
| Hospital                                                       | 85 975        | 1 171 703    | 7.3                     | 1                | 1                         |
| Birth Centre                                                   | 2503          | 71 505       | 3.5                     | 0.46 (0.43-0.48) | 0.42 (0.40-0.44)          |
| Home                                                           | 108           | 8212         | 1.3                     | 0.17 (0.13-0.22) | 0.18 (0.14-0.24)          |
| <b>Forceps birth</b>                                           | 56 332        | 1 251 420    | 4.5                     |                  |                           |
| Hospital                                                       | 54 451        | 1 171 703    | 4.6                     | 1                | 1                         |
| Birth Centre                                                   | 1820          | 71 505       | 2.5                     | 0.54 (0.50-0.57) | 0.54 (0.50-0.58)          |
| Home                                                           | 61            | 8212         | 0.7                     | 0.15 (0.11-0.21) | 0.21 (0.14-0.31)          |
| <b>Intrapartum caesarean section</b>                           | 94 303        | 1 251 420    | 7.5                     |                  |                           |
| Hospital                                                       | 91 238        | 1 171 703    | 7.8                     | 1                | 1                         |
| Birth Centre                                                   | 2871          | 71 505       | 4.0                     | 0.50 (0.47-0.52) | 0.45 (0.43-0.48)          |
| Home                                                           | 194           | 8212         | 2.4                     | 0.29 (0.24-0.35) | 0.29 (0.24-0.35)          |
| <b>Mode of birth not stated</b>                                | 20 081        | 1 251 420    | 1.6                     |                  |                           |
| Hospital                                                       | 19 525        | 1 171 703    | 1.7                     | 1                | 1                         |
| Birth Centre                                                   | 521           | 71 505       | 0.7                     | 0.43 (0.39-0.49) | 0.41 (0.36-0.46)          |
| Home                                                           | 35            | 8212         | 0.4                     | 0.25 (0.16-0.39) | 0.26 (0.17-0.41)          |
| <b>Intact perineum*</b>                                        | 308 232       | 1 157 117    | 26.6                    |                  |                           |
| Hospital                                                       | 283 887       | 1 080 465    | 26.3                    | 1                | 1                         |
| Birth Centre                                                   | 20 562        | 68 634       | 30.0                    | 1.20(1.17-1.23)  | 1.39(1.36-1.43)           |
| Home                                                           | 3783          | 8018         | 47.2                    | 2.51(2.37-2.66)  | 2.72(2.56-2.90)           |
| <b>3<sup>rd</sup> or 4<sup>th</sup> degree perineal trauma</b> | 23 165        | 1 157 117    | 2.0                     |                  |                           |
| Hospital *¥                                                    | 21 454        | 1 080 465    | 2.0                     | 1                | 1                         |
| Birth Centre                                                   | 1641          | 68 634       | 2.4                     | 1.21 (1.13-1.29) | 1.17 (1.09-1.25)          |
| Home                                                           | 70            | 8018         | 0.9                     | 0.43 (0.32-0.59) | 0.53 (0.36-0.73)          |

1  
2  
3  
4  
5  
6  
7  
8  
9  
10  
11  
12  
13  
14  
15  
16  
17  
18  
19  
20  
21  
22  
23  
24  
25  
26  
27  
28  
29  
30  
31  
32  
33  
34  
35  
36  
37  
38  
39  
40  
41  
42  
43  
44  
45  
46

|                                                |         |           |      |                  |                  |
|------------------------------------------------|---------|-----------|------|------------------|------------------|
| <b>Episiotomy*</b>                             | 193 171 | 1 157 117 | 16.7 |                  |                  |
| Hospital                                       | 187 276 | 1 080 465 | 17.3 | 1                | 1                |
| Birth Centre                                   | 5688    | 68 634    | 8.3  | 0.43 (0.42-0.45) | 0.37 (0.36-0.39) |
| Home                                           | 207     | 8018      | 2.6  | 0.13 (0.11-0.15) | 0.13 (0.10-0.15) |
| <b>Oxytocin augmentation</b>                   | 199 302 | 1 251 420 | 15.9 |                  |                  |
| Hospital                                       | 193 229 | 1 171 703 | 16.5 | 1                | 1                |
| Birth Centre                                   | 5790    | 71 505    | 8.1  | 0.45 (0.43-0.46) | 0.41 (0.40-0.43) |
| Home                                           | 283     | 8212      | 3.4  | 0.18 (0.15-0.21) | 0.19 (0.16-0.22) |
| <b>Epidural or spinal analgesia for labour</b> | 166 746 | 1 251 420 | 13.3 |                  |                  |
| Hospital                                       | 161 796 | 1 171 703 | 13.8 | 1                | 1                |
| Birth Centre                                   | 4675    | 71 505    | 6.5  | 0.44 (0.42-0.45) | 0.41 (0.39-0.43) |
| Home                                           | 275     | 8212      | 3.3  | 0.22 (0.18-0.25) | 0.22 (0.19-0.26) |

<sup>Æ</sup> Logistic regression adjusted for maternal age, country of birth, gestational age and parity at 99% CI.

\* Denominator = excluded caesarean section

¥ Included episiotomy extensions

Cases with missing data were not included in rates or regression calculations.

Variables on mode of birth and intervention are as defined by each state or territory.

**Table 4: Maternal postpartum complications by planned place of birth**

| Complication and planned place of birth                                                | No of events | No of births | Incidence of events/1000 births | Unadjusted OR    | Adjusted OR <sup>Æ</sup> |
|----------------------------------------------------------------------------------------|--------------|--------------|---------------------------------|------------------|--------------------------|
| <b>Postpartum haemorrhage with blood transfusion</b>                                   | 6518         | 1 251 420    | 5.2                             |                  |                          |
| Hospital                                                                               | 6230         | 1 171 703    | 5.3                             | 1                | 1                        |
| Birth Centre                                                                           | 244          | 71 505       | 3.4                             | 0.64 (0.54-0.76) | 0.66 (0.56-0.78)         |
| Home                                                                                   | 44           | 8212         | 5.4                             | 1.01 (0.68-1.49) | 1.08 (0.73-1.60)         |
| <b>Admission at least 48 hrs to intensive care or high dependency unit<sup>∞</sup></b> | 2602         | 707 221*     | 3.7                             |                  |                          |
| Hospital                                                                               | 2521         | 654 960      | 3.8                             | 1                | 1                        |
| Birth Centre                                                                           | 74           | 47 266       | 1.6                             | 0.41 (0.30-0.55) | 0.42 (0.31-0.56)         |
| Home                                                                                   | 7            | 4995         | 1.4                             | 0.36 (0.14-0.96) | 0.41 (0.15-1.08)         |
| <b>Readmission to hospital (within 28 days)</b>                                        | 917          | 864 865**    | 1.1                             |                  |                          |
| Hospital                                                                               | 843          | 804 667      | 1.0                             | 1                | 1                        |
| Birth Centre                                                                           | 68           | 54 522       | 1.2                             | 1.19 (0.86-1.65) | 1.18 (0.85-1.64)         |
| Home                                                                                   | 6            | 5676         | 1.1                             | 1.01 (0.35-2.90) | 1.08 (0.38-3.12)         |

<sup>Æ</sup> Logistic regression adjusted for maternal age, country of birth, gestational age and parity at 99% CI.

\* Excluded QLD, VIC, NT, ACT, TAS

<sup>∞</sup> Intensive care and high dependency units provided additional care – these were defined by each state and territory

\*\* Excluded VIC, NT

Cases with missing data were not included in rates or regression calculations



Table 5: Perinatal outcomes by planned place of birth and parity^^

| Planned place of birth                                         | No. of events | No. of births | Incidence of events/1000 births | Unadjusted OR     | Adjusted OR <sup>Æ</sup> |
|----------------------------------------------------------------|---------------|---------------|---------------------------------|-------------------|--------------------------|
| <b>Stillbirth during labour, early and late neonatal death</b> | 921           | 1 251 420     | 0.7                             |                   |                          |
| Hospital                                                       | 880           | 1 171 050     | 0.8                             | 1                 | 1                        |
| Birth Centre                                                   | 32            | 71 505        | 0.4                             | 0.60 (0.37-0.95)  | 0.84 (0.60-1.19)         |
| Home                                                           | 9             | 8212          | 1.1                             | 1.46 (0.62-3.47)  | 1.55 (0.65-3.69)         |
| <b>Primiparous women</b>                                       | 425           | 525 205       | 0.8                             |                   |                          |
| Hospital                                                       | 406           | 494 019       | 0.8                             | 1                 | 1                        |
| Birth Centre                                                   | 15            | 28 891        | 0.5                             | 0.63 (0.32-1.24)  | 0.65 (0.33-1.27)         |
| Home                                                           | na            | 2295          | na                              | na                | na                       |
| <b>Multiparous women</b>                                       | 496           | 725 516       | 0.7                             |                   |                          |
| Hospital                                                       | 474           | 677 031       | 0.7                             | 1                 | 1                        |
| Birth Centre                                                   | 17            | 42 596        | 0.4                             | 0.57 (0.30-1.08)  | 0.65 (0.34-1.23)         |
| Home                                                           | 5             | 5889          | 0.8                             | 1.21 (0.38-3.86)  | 1.29 (0.40-4.14)         |
| <b>Stillbirth during labour</b>                                | 399           | 1 251 420     | 0.32                            |                   |                          |
| Hospital                                                       | 378           | 1 171 703     | 0.32                            | 1                 | 1                        |
| Birth Centre                                                   | 17            | 71 505        | 0.24                            | 0.74 (0.39-1.40)  | 0.78 (0.41-1.48)         |
| Home                                                           | na            | 8212          | na                              | na                | na                       |
| <b>Early neonatal death<sup>1</sup></b>                        | 240           | 881 064*      | 0.27                            |                   |                          |
| Hospital                                                       | 221           | 819 963       | 0.27                            | 1                 | 1                        |
| Birth Centre                                                   | 14            | 55 312        | 0.25                            | 0.84 (0.46-1.91)  | 0.94 (0.46-1.92)         |
| Home                                                           | 5             | 5789          | 0.86                            | 3.21 (1.00-10.28) | 3.18 (0.98-10.30)        |
| <b>Late neonatal death<sup>2</sup></b>                         | 95            | 881 064*      | 0.11                            |                   |                          |
| Hospital                                                       | 94            | 819 963       | 0.11                            | 1                 | 1                        |
| Birth Centre                                                   | na            | 55 312        | na                              | na                | na                       |
| Home                                                           | na            | 5789          | na                              | na                | na                       |
| <b>Admission to SCN and/or NICU &gt;48hrs<sup>3</sup></b>      | 7500          | 881 064*      | 8.51                            |                   |                          |
| Hospital                                                       | 6908          | 819 963       | 8.42                            | 1                 | 1                        |
| Birth Centre                                                   | 562           | 55 312        | 10.16                           | 1.21 (1.08-1.35)  | 1.24 (1.10-1.39)         |

|                                                           |        |           |       |                  |                  |
|-----------------------------------------------------------|--------|-----------|-------|------------------|------------------|
| Home                                                      | 30     | 5789      | 5.18  | 0.61 (0.38-0.98) | 0.63 (0.39-1.01) |
| <b>Readmission to hospital within 28 days<sup>4</sup></b> | 37 569 | 1 251 420 | 30.02 |                  |                  |
| Hospital                                                  | 35 413 | 1 171 703 | 30.22 | 1                | 1                |
| Birth Centre                                              | 1967   | 71 505    | 27.51 | 0.91 (0.85-0.96) | 0.95 (0.90-1.01) |
| Home                                                      | 189    | 8212      | 23.02 | 0.76 (0.63-0.91) | 0.83 (0.68-1.00) |

<sup>^</sup>Denominator excluded missing parity information. The denominator in the first section of this table has 699 records with missing data for parity. Because this part of the data analysis was stratified by parity, we excluded the women whose parity data were unavailable.

na: cell size <5 so unable to report data or calculate incidence or OR

<sup>1</sup> Early neonatal death: death of a liveborn infant occurring within 7 completed days from the time of birth.

<sup>2</sup> Late neonatal death: death of a liveborn infant occurring after 7 completed days but before 29 completed days.

<sup>3</sup> NICU and SCN were combined due to complexities in the data to separate them out for all states and territories, except the Northern Territory where there was only SCN available and for South Australia where only NICU was available.

<sup>4</sup> For home births, this is defined as admission to hospital following birth within 28 days.

\* Excluded VIC.

<sup>^E</sup> Logistic regression was undertaken with adjustments occurring for maternal age, country of birth, gestational age, and parity at 99% CI. Any case with missing data was excluded from the regression.

<sup>^^</sup> Parity refers to previous pregnancies >20 weeks.

## REFERENCES

1. Australian Institute of Health and Welfare. Australia's mothers and babies 2015 – in brief. Perinatal statistics series no. 33. Cat no. PER 91. Canberra: AIHW; 2017.
2. Homer C. Models of maternity care: evidence for midwifery continuity of care. *Medical Journal of Australia* 2016; **205**: 370-4.
3. Donnelly N, Butler-Henderson K, Chapman M, Sullivan E. The development of a classification system for maternity models of care. *Health Information Management Journal* 2016; **45**(2): 64-70.
4. Monk A, Tracy S, Foureur M, Barclay L. Australian primary maternity units: past, present and future. *Women Birth* 2013; **26**(3): 213-8.
5. ABS. Australian Demographic Statistics. 2018. <http://www.abs.gov.au/ausstats/abs@.nsf/mf/3101.0> (accessed 13 June 2018).
6. Catling-Paull C, Foureur M, Homer C, on behalf of the members of the Publicly-funded Homebirth Consortium. Publicly-funded homebirth models in Australia. *Women & Birth* 2012; **25**: 152-8.
7. Catling-Paull C, Coddington R, Foureur M, Homer CSE. Publicly-funded homebirth in Australia: A review of maternal and neonatal outcomes for the last 6 years. *MJA* 2013; **198**(11): 616-20.
8. Scarf V, Rossiter C, Vedam S, et al. Maternal and perinatal outcomes by planned place of birth among women with low-risk pregnancies in high-income countries: A systematic review and meta-analysis. *Midwifery* 2018; **62**: 240-55.
9. ABS. Births, Australia 2016. 2017. <http://www.abs.gov.au/ausstats/abs@.nsf/Latestproducts/3301.0Main%20Features32016?opendocument&tabname=Summary&prodno=3301.0&issue=2016&num=&view=> (accessed 13 June 2018).
10. Kennare R, Keirse M, Tucker G, Chan A. Planned home and hospital births in South Australia, 1991-2006: differences in outcomes. *Medical Journal of Australia* 2010; **192**: 76-80.
11. Birthplace in England Collaborative Group. Perinatal and maternal outcomes by planned place of birth for healthy women with low risk pregnancies: the Birthplace in England national prospective cohort study. *BMJ* 2011; **343**:d7400 doi: 10.1136/bmj.d7400.
12. de Jonge A, van der Goes B, Ravelli A, et al. Perinatal mortality and morbidity in a nationwide cohort of 529 688 low-risk planned home and hospital births. *BJOG* 2009; **116**(9): 1177-84.
13. de Jonge A, Geerts C, van der Goes B, Mol B, Buitendijk S, Nijhuis J. Perinatal mortality and morbidity up to 28 days after birth among 743 070 low-risk planned home and hospital births: a cohort study based on three merged national perinatal databases. *Bjog* 2015; **122**(5): 720-8.
14. Hutton E, Cappelletti A, Reitsma A, et al. Outcomes associated with planned place of birth among women with low-risk pregnancies. *Cmaj* 2016; **188**(5): E80-90.
15. Laws P, Xu F, Welsh A, Tracy S, Sullivan E. Maternal morbidity of women receiving birth center care in New South Wales: a matched-pair analysis using linked health data. *Birth* 2014; **41**(3): 268-75.
16. Laws P, Tracy S, Sullivan E. Perinatal outcomes of women intending to give birth in birth centers in Australia. *Birth* 2010; **37**(1): 28-36.
17. Tracy S, Dahlen H, Laws P, Wang Y, Tracy M, Sullivan E. Birth centres in Australia. A national population-based study of perinatal mortality associated with giving birth in a birth centre. *Birth* 2007; **34**(3): 194-201.
18. Homer CSE, Davis GK, Petocz P, Barclay L, Matha D, Chapman MG. The obstetric outcomes of low risk women: birth centre versus labour ward. *Australian Journal of Advanced Nursing* 2000; **18**(1): 8-12.

19. Monk A, Tracy M, Foureur M, Grigg C, Tracy S. Evaluating Midwifery Units (EMU): a prospective cohort study of freestanding midwifery units in New South Wales, Australia. *BMJ Open* 2014; **4**(10).
20. Ryan M, Roberts C. A retrospective cohort study comparing the clinical outcomes of a birth centre and labour ward in the same hospital. *Australian Midwifery* 2005; **18**(2): 17-21.
21. RANZCOG. College Statement: Homebirths. Melbourne: Royal Australian & New Zealand College of Obstetricians & Gynaecologists; 2017.
22. Australian Consortium for Classification Development. ICD-10-AM/ACHI/ACS. 2018. <https://www.accd.net.au/icd10.aspx> (accessed 4 June 2018).
23. Australian College of Midwives. National Midwifery Guidelines for Consultation and Referral - 3rd Edition Issue 2. Canberra: Australian College of Midwives; 2015.
24. Harron K, Wade A, Gilbert R, Muller-Pebody B, Goldstein H. Evaluating bias due to data linkage error in electronic healthcare records. *BMC Med Res Methodol* 2014; **14**: 36.
25. Meray N, Reitsma J, Ravelli A, Bonsel G. Probabilistic record linkage is a valid and transparent tool to combine databases without a patient identification number. *J Clin Epidemiol* 2007; **60**(9): 883-91.
26. Centre for Health Record Linkage. Quality assurance. 2018. <http://www.cherel.org.au/quality-assurance> (accessed 21 May 2018).
27. Cheah S, Scarf V, Rossiter C, Thornton C, Homer C. Juggling complexity: Undertaking the first national linked data research on perinatal and maternal outcomes in Australia. *Journal of Biomedical Informatics* 2019; **93**: 103152.
28. Davis D, Baddock S, Pairman S, et al. Planned Place of Birth in New Zealand: Does it Affect Mode of Birth and Intervention Rates Among Low-Risk Women? *Birth: Issues in Perinatal Care* 2011; **38**(2): 111-9 9p.
29. Bernitz S, Rolland R, Blix E, et al. Is the operative delivery rate in low-risk women dependent on the level of birth care? A randomised controlled trial. *BJOG: An International Journal of Obstetrics and Gynaecology* 2011: 1357-64.
30. Eide BI, Nilsen AB, Rasmussen S. Births in two different delivery units in the same clinic--a prospective study of healthy primiparous women. *BMC Pregnancy & Childbirth* 2009; **9**: 25.
31. Overgaard C, Moller AM, Fenger-Gron F, et al. Freestanding midwifery unit versus obstetric unit: a matched cohort study of outcomes in low-risk women South Australian group of newborn samples. *BMJ Open* 2011.
32. Homer CS, Thornton C, Scarf VL, et al. Birthplace in New South Wales, Australia: an analysis of perinatal outcomes using routinely collected data. *BMC Pregnancy & Childbirth* 2014; **14**: 206.
33. Birthplace in England Collaborative Group. Perinatal and maternal outcomes by planned place of birth for healthy women with low risk pregnancies: the Birthplace in England national prospective cohort study. *BMJ* 2011.
34. Dahlen H, Dowling H, Tracy M, Schmied V, Tracy S. Maternal and perinatal outcomes amongst low risk women giving birth in water compared to six birth positions on land. A descriptive cross sectional study in a birth centre over 12 years. *Midwifery* 2013; **29**(7): 759-64.
35. Byrne JP, Crowther CA, Moss JR. A randomised controlled trial comparing birthing centre care with delivery suite care in Adelaide, Australia. *ANZJOG* 2000; **40**(3): 268-74.
36. Hilder L, Zhichao Z, Parker M, Jahan S, Chambers G. Australia's mothers and babies 2012 (Perinatal statistics series no. 30. Cat. no. PER 69). Canberra: AIHW; 2014.

1  
2  
3  
4  
5  
6  
7  
8  
9  
10  
11  
12  
13  
14  
15  
16  
17  
18  
19  
20  
21  
22  
23  
24  
25  
26  
27  
28  
29  
30  
31  
32  
33  
34  
35  
36  
37  
38  
39  
40  
41  
42  
43  
44  
45  
46

For peer review only

1  
2  
3 **SUPPLEMENTARY FILE 1**  
4

5 **Ethics approval**  
6  
7

8 The study received initial ethical approval from the lead university's Human Research Ethics  
9 Committee (HREC) – University of Technology Sydney, Australia (university reference  
10 number: 2012000167). Each state and territory also provided ethical approval.  
11  
12  
13  
14

| State or territory           | Name of the ethics committee(s)                                                                                             | Number/ID of the approval |
|------------------------------|-----------------------------------------------------------------------------------------------------------------------------|---------------------------|
| Australian Capital Territory | ACT Health HREC                                                                                                             | ETH 3.14.061              |
| New South Wales              | NSW Population and Health Services HREC                                                                                     | HREC/14/CIPHS/15          |
| Northern Territory           | Department of Health of the Northern Territory and the Menzies School of Health Research HREC                               | HREC 2014-2247            |
| Queensland                   | Qld Health Office of the HREC                                                                                               | HREC/14/QGC/175           |
| South Australia              | South Australian Health HREC                                                                                                | HREC/14/SAH/117           |
| Tasmania                     | Tasmania Network HREC                                                                                                       | Ref No: H0015023          |
| Victoria                     | Department of Health and Human Services – Consultative Council on Obstetric and Paediatric Mortality and Morbidity (CCOPMM) | Ref: 14/12                |
| Western Australia            | Government of Western Australia, Department of Health HREC                                                                  | HREC 2014/57              |

15  
16  
17  
18  
19  
20  
21  
22  
23  
24  
25  
26  
27  
28  
29  
30  
31  
32  
33  
34  
35  
36  
37  
38  
39  
40  
41  
42  
43  
44  
45  
46  
47  
48  
49  
50  
51  
52  
53  
54  
55  
56  
57  
58  
59  
60

STROBE Statement—Checklist of items that should be included in reports of *cohort studies*

|                              | Item No | Recommendation                                                                                                                                                                                    | Page no       |
|------------------------------|---------|---------------------------------------------------------------------------------------------------------------------------------------------------------------------------------------------------|---------------|
| <b>Title and abstract</b>    | 1       | (a) Indicate the study's design with a commonly used term in the title or the abstract                                                                                                            | 1             |
|                              |         | (b) Provide in the abstract an informative and balanced summary of what was done and what was found                                                                                               | 1             |
| <b>Introduction</b>          |         |                                                                                                                                                                                                   |               |
| Background/rationale         | 2       | Explain the scientific background and rationale for the investigation being reported                                                                                                              | 6             |
| Objectives                   | 3       | State specific objectives, including any prespecified hypotheses                                                                                                                                  | 8             |
| <b>Methods</b>               |         |                                                                                                                                                                                                   |               |
| Study design                 | 4       | Present key elements of study design early in the paper                                                                                                                                           | 8             |
| Setting                      | 5       | Describe the setting, locations, and relevant dates, including periods of recruitment, exposure, follow-up, and data collection                                                                   | 8-9           |
| Participants                 | 6       | (a) Give the eligibility criteria, and the sources and methods of selection of participants. Describe methods of follow-up                                                                        | 8-9           |
|                              |         | (b) For matched studies, give matching criteria and number of exposed and unexposed                                                                                                               | NA            |
| Variables                    | 7       | Clearly define all outcomes, exposures, predictors, potential confounders, and effect modifiers. Give diagnostic criteria, if applicable                                                          | 9-10          |
| Data sources/<br>measurement | 8*      | For each variable of interest, give sources of data and details of methods of assessment (measurement). Describe comparability of assessment methods if there is more than one group              | 10-11         |
| Bias                         | 9       | Describe any efforts to address potential sources of bias                                                                                                                                         | 10-11         |
| Study size                   | 10      | Explain how the study size was arrived at                                                                                                                                                         |               |
| Quantitative variables       | 11      | Explain how quantitative variables were handled in the analyses. If applicable, describe which groupings were chosen and why                                                                      | 11-12         |
| Statistical methods          | 12      | (a) Describe all statistical methods, including those used to control for confounding                                                                                                             | 11-12         |
|                              |         | (b) Describe any methods used to examine subgroups and interactions                                                                                                                               | 11-12         |
|                              |         | (c) Explain how missing data were addressed                                                                                                                                                       | 12            |
|                              |         | (d) If applicable, explain how loss to follow-up was addressed                                                                                                                                    | NA            |
|                              |         | (e) Describe any sensitivity analyses                                                                                                                                                             | NA            |
| <b>Results</b>               |         |                                                                                                                                                                                                   |               |
| Participants                 | 13*     | (a) Report numbers of individuals at each stage of study—eg numbers potentially eligible, examined for eligibility, confirmed eligible, included in the study, completing follow-up, and analysed | 12<br>Table 1 |
|                              |         | (b) Give reasons for non-participation at each stage                                                                                                                                              | 12            |
|                              |         | (c) Consider use of a flow diagram                                                                                                                                                                | Table 1       |
| Descriptive data             | 14*     | (a) Give characteristics of study participants (eg demographic, clinical, social) and information on exposures and potential confounders                                                          | 12            |
|                              |         | (b) Indicate number of participants with missing data for each variable of interest                                                                                                               | In each table |
|                              |         | (c) Summarise follow-up time (eg, average and total amount)                                                                                                                                       | NA            |

|                          |     |                                                                                                                                                                                                              |                      |
|--------------------------|-----|--------------------------------------------------------------------------------------------------------------------------------------------------------------------------------------------------------------|----------------------|
| Outcome data             | 15* | Report numbers of outcome events or summary measures over time                                                                                                                                               | 12-14                |
| Main results             | 16  | (a) Give unadjusted estimates and, if applicable, confounder-adjusted estimates and their precision (eg, 95% confidence interval). Make clear which confounders were adjusted for and why they were included | 12-14<br>Plus tables |
|                          |     | (b) Report category boundaries when continuous variables were categorized                                                                                                                                    | Tables               |
|                          |     | (c) If relevant, consider translating estimates of relative risk into absolute risk for a meaningful time period                                                                                             | NA                   |
| Other analyses           | 17  | Report other analyses done—eg analyses of subgroups and interactions, and sensitivity analyses                                                                                                               | NA                   |
| <b>Discussion</b>        |     |                                                                                                                                                                                                              |                      |
| Key results              | 18  | Summarise key results with reference to study objectives                                                                                                                                                     | 14-15                |
| Limitations              | 19  | Discuss limitations of the study, taking into account sources of potential bias or imprecision. Discuss both direction and magnitude of any potential bias                                                   | 16                   |
| Interpretation           | 20  | Give a cautious overall interpretation of results considering objectives, limitations, multiplicity of analyses, results from similar studies, and other relevant evidence                                   | 16-17                |
| Generalisability         | 21  | Discuss the generalisability (external validity) of the study results                                                                                                                                        | 15-17                |
| <b>Other information</b> |     |                                                                                                                                                                                                              |                      |
| Funding                  | 22  | Give the source of funding and the role of the funders for the present study and, if applicable, for the original study on which the present article is based                                                | 2                    |

\*Give information separately for exposed and unexposed groups.

**Note:** An Explanation and Elaboration article discusses each checklist item and gives methodological background and published examples of transparent reporting. The STROBE checklist is best used in conjunction with this article (freely available on the Web sites of PLoS Medicine at <http://www.plosmedicine.org/>, Annals of Internal Medicine at <http://www.annals.org/>, and Epidemiology at <http://www.epidem.com/>). Information on the STROBE Initiative is available at <http://www.strobe-statement.org>.



# BMJ Open

## Maternal and perinatal outcomes by planned place of birth in Australia 2000 – 2012: A linked population data study

|                                 |                                                                                                                                                                                                                                                                                                                                                                                                                                                                                                                                                                                                                                                                                                                                                                                                                                                                                                                                                                                                                                                                                                                                              |
|---------------------------------|----------------------------------------------------------------------------------------------------------------------------------------------------------------------------------------------------------------------------------------------------------------------------------------------------------------------------------------------------------------------------------------------------------------------------------------------------------------------------------------------------------------------------------------------------------------------------------------------------------------------------------------------------------------------------------------------------------------------------------------------------------------------------------------------------------------------------------------------------------------------------------------------------------------------------------------------------------------------------------------------------------------------------------------------------------------------------------------------------------------------------------------------|
| Journal:                        | <i>BMJ Open</i>                                                                                                                                                                                                                                                                                                                                                                                                                                                                                                                                                                                                                                                                                                                                                                                                                                                                                                                                                                                                                                                                                                                              |
| Manuscript ID                   | bmjopen-2019-029192.R2                                                                                                                                                                                                                                                                                                                                                                                                                                                                                                                                                                                                                                                                                                                                                                                                                                                                                                                                                                                                                                                                                                                       |
| Article Type:                   | Original research                                                                                                                                                                                                                                                                                                                                                                                                                                                                                                                                                                                                                                                                                                                                                                                                                                                                                                                                                                                                                                                                                                                            |
| Date Submitted by the Author:   | 03-Sep-2019                                                                                                                                                                                                                                                                                                                                                                                                                                                                                                                                                                                                                                                                                                                                                                                                                                                                                                                                                                                                                                                                                                                                  |
| Complete List of Authors:       | Homer, Caroline; University of Technology Sydney, Centre for Midwifery, Child and Family Health; Burnet Institute, Maternal and Child Health<br>Cheah, Seong; University of Technology Sydney Faculty of Health, Centre for Midwifery, Child and Family Health<br>Rossiter, Chris; University of Technology Sydney,<br>Dahlen, Hannah; University of Western Sydney, School of Nursing and Midwifery<br>Ellwood, David; Griffith University, School of Medicine<br>Foureur, Maralyn; UTS, Health<br>Forster, Della; La Trobe University, Judith Lumley Centre; Royal Women's Hospital, Maternity Services<br>McLachlan, HL; La Trobe University, Judith Lumley Centre; La Trobe University, School of Nursing and Midwifery<br>Oats, Jeremy; University of Melbourne Institute, Melbourne School of Population and Global Health<br>Sibbritt, David; University of Technology Sydney, Faculty of Health<br>Thornton, Charlene; Flinders University Faculty of Medicine Nursing and Health Sciences, College of Nursing and Health Sciences<br>Scarf, Vanessa; University of Technology Sydney, Centre for Midwifery, Child and Family Health |
| <b>Primary Subject Heading</b>: | Obstetrics and gynaecology                                                                                                                                                                                                                                                                                                                                                                                                                                                                                                                                                                                                                                                                                                                                                                                                                                                                                                                                                                                                                                                                                                                   |
| Secondary Subject Heading:      | Obstetrics and gynaecology, Nursing                                                                                                                                                                                                                                                                                                                                                                                                                                                                                                                                                                                                                                                                                                                                                                                                                                                                                                                                                                                                                                                                                                          |
| Keywords:                       | Maternal medicine < OBSTETRICS, EPIDEMIOLOGY, PERINATOLOGY                                                                                                                                                                                                                                                                                                                                                                                                                                                                                                                                                                                                                                                                                                                                                                                                                                                                                                                                                                                                                                                                                   |
|                                 |                                                                                                                                                                                                                                                                                                                                                                                                                                                                                                                                                                                                                                                                                                                                                                                                                                                                                                                                                                                                                                                                                                                                              |

SCHOLARONE™  
Manuscripts

# Maternal and perinatal outcomes by planned place of birth in Australia 2000 – 2012: A linked population data study

Homer, Caroline SE

Centre for Midwifery, Child and Family Health, Faculty of Health, University of Technology  
Sydney, Sydney, Australia

Maternal and Child Health Program, Burnet Institute, Melbourne, Australia

Cheah, Seong

Centre for Midwifery, Child and Family Health, Faculty of Health, University of Technology  
Sydney, Sydney, Australia

Rossiter, Chris

Centre for Midwifery, Child and Family Health, Faculty of Health, University of Technology  
Sydney, Sydney, Australia

Dahlen, Hannah G

School of Nursing and Midwifery, University of Western Sydney, Sydney, Australia

Ellwood, David

School of Medicine, Griffith University, and Gold Coast University Hospital, Queensland,  
Australia

Foureux, Maralyn

Centre for Midwifery, Child and Family Health, Faculty of Health, University of Technology  
Sydney, Sydney, Australia

Forster, Della

Judith Lumley Centre; Royal Women's Hospital, Maternity Services, La Trobe University,  
Melbourne, Australia

McLachlan, Helen L

Judith Lumley Centre; La Trobe University, Melbourne, Australia

Oats, Jeremy

Melbourne School of Population and Global Health, University of Melbourne, Melbourne,  
Australia

Sibbritt, David

Faculty of Health, University of Technology Sydney, Sydney, Australia

Thornton, Charlene

Faculty of Medicine Nursing and Health Sciences, College of Nursing and Health Sciences  
Flinders University, Adelaide, Australia

1  
2  
3  
4 Scarf, Vanessa L  
5 Centre for Midwifery, Child and Family Health, Faculty of Health, University of Technology  
6 Sydney, Sydney, Australia  
7  
8

9  
10 Corresponding author  
11 Professor Caroline Homer AO  
12 University of Technology Sydney, Australia  
13 T +613 8506 2454  
14 M +61 418 466 974  
15 E [caroline.homer@uts.edu.au](mailto:caroline.homer@uts.edu.au)  
16  
17  
18  
19  
20

21 Keywords: Maternal medicine, obstetrics, epidemiology, perinatology  
22

23 Word count - excluding title page, references, figures: 5475  
24  
25  
26  
27  
28  
29  
30  
31  
32  
33  
34  
35  
36  
37  
38  
39  
40  
41  
42  
43  
44  
45  
46  
47  
48  
49  
50  
51  
52  
53  
54  
55  
56  
57  
58  
59  
60

## ABSTRACT

**Objective** – To compare perinatal and maternal outcomes for Australian women with uncomplicated pregnancies according to planned place of birth, that is, in hospital labour wards, birth centres or at home.

**Design** – A population-based retrospective design, linking and analysing routinely collected electronic data. Analysis comprised chi-square tests and binary logistic regression for categorical data, yielding adjusted odds ratios. Continuous data were analysed using ANOVA.

**Setting** – All eight Australian states and territories.

**Participants** – Women with uncomplicated pregnancies who gave birth between 2000 and 2012 to a singleton baby in cephalic presentation at between 37 and 41 completed weeks' gestation. Of the 1 251 420 births, 1 171 703 (93.6%) were planned in hospital labour wards, 71 505 (5.7%) in birth centres and 8212 (0.7%) at home.

**Main outcome measures** – Mode of birth, normal labour and birth, interventions and procedures during labour and birth, maternal complications, admission to special care/high dependency or intensive care units (mother or infant) and perinatal mortality (intrapartum stillbirth and neonatal death).

**Results** – Compared with planned hospital births, the odds of normal labour and birth were over twice as high in planned birth centre births (AOR 2.72; 99% CI 2.63-2.81) and nearly six times as high in planned home births (AOR 5.91; 99% CI 5.15-6.78). There were no statistically significant differences in the proportion of intrapartum stillbirths, early or late neonatal deaths between the three planned places of birth.

**Conclusions** – This is the first Australia-wide study to examine outcomes by planned place of birth. For healthy women in Australia having an uncomplicated pregnancy, planned births in birth centres or at home are associated with positive maternal outcomes although the number of homebirths was small overall. There were no significant differences in the perinatal mortality rate, although the absolute numbers of deaths were very small and therefore firm conclusions cannot be drawn about perinatal mortality outcomes.

## ARTICLE SUMMARY

### Strengths and limitations of this study

- This retrospective study reveals the first Australia-wide evidence on the relative safety of planned birth in hospital, a birth centre and at home.
- It analyses linked data on the outcomes for women with uncomplicated pregnancies and their infants in all eight Australian states and territories.
- Careful data screening eliminated most causes of obstetric complexity, resulting in three cohorts with equivalent levels of risk.
- Inconsistency between state-based datasets limited the number of confounding variables available for analysis.
- Insufficient data on changes in planned birth place prior to labour hampered identification of intrapartum transfers and analysis of the relationship between intended and actual place of birth.

### Funding statement

This work was supported by the National Health and Medical Research Council Australia, Grant ID 1022422 (2012-2017).

### Competing interest statement

We have read and understood *BMJ* policy on declaration of interests and declare that we have no competing interests.

### Acknowledgements

We acknowledge and thank the data custodians in each state and territory and the data linkage units who assisted with data collection at each jurisdictional level.

### Ethics approval

The study received initial ethical approval from the lead university's Human Research Ethics Committee (HREC) (university reference number: 2012000167) and from data custodians in each state and territory. The details are provided in a Supplementary File.

### Author contribution

1  
2  
3 CH as the lead investigator was responsible for the overall leadership of the study including  
4 the initial conception and design, grant application, ethical approval processes, leading the  
5 project, drafting the manuscript and finalising the paper.  
6  
7  
8

9 SC was the data analyst responsible for merging the datasets from each jurisdiction, refining  
10 the datasets, developing the analysis codes and processes, and conducting the statistical  
11 analysis and has provided final approval of this version.  
12  
13  
14

15 CR worked with the data analyst to support data analysis and interpretation as well as  
16 taking a key role in supporting the drafting of the manuscript and has provided final  
17 approval of this version.  
18  
19  
20

21 HD was involved in the initial design of the study, played a key role in developing the study  
22 questions and data analytic processes, was involved in drafting the work and/or revising it  
23 critically for important intellectual content and has provided final approval of this version.  
24  
25  
26

27 DE was involved in the initial design of the study, played a key role in developing the study  
28 questions and providing expert review, was involved in drafting the work and/or revising it  
29 critically for important intellectual content and has provided final approval of this version.  
30  
31  
32

33 MF was involved in the initial design of the study, played a key role in developing the study  
34 questions and providing expert review, was involved in drafting the work and/or revising it  
35 critically for important intellectual content and has provided final approval of this version.  
36  
37  
38

39 DF was involved in the initial design of the study, played a key role in developing the study  
40 questions and providing expert review, was involved in drafting the work and/or revising it  
41 critically for important intellectual content and has provided final approval of this version.  
42  
43  
44

45 HM was involved in the initial design of the study, played a key role in developing the study  
46 questions and providing expert review, was involved in drafting the work and/or revising it  
47 critically for important intellectual content and has provided final approval of this version.  
48  
49  
50

51 JO was involved in the initial design of the study, played a key role in developing the study  
52 questions and providing expert review, was involved in drafting the work and/or revising it  
53 critically for important intellectual content and has provided final approval of this version.  
54  
55  
56  
57  
58  
59  
60

1  
2  
3 DS was involved in the initial design of the study, played a key role in developing the study  
4 questions and analytic processes and providing expert statistical planning and review, was  
5 involved in drafting the work and/or revising it critically for important intellectual content  
6 and has provided final approval of this version.  
7  
8  
9

10  
11 CT played a key role in developing the study questions and analytic plan, assisted with  
12 planning the data set merging and cleaning of the data and providing expert epidemiological  
13 review, was involved in drafting the work and/or revising it critically for important  
14 intellectual content and has provided final approval of this version.  
15  
16  
17

18  
19 VS was the project coordinator responsible for the ethical approval processes, took a key  
20 role in coordinating the acquisition of the data from the different states and territories as  
21 well as a lead role in planning and undertaking the analysis and interpretation, was involved  
22 in drafting the work and/or revising it critically for important intellectual content and has  
23 provided final approval of this version.  
24  
25  
26  
27  
28

### 29 **Consent**

30  
31 Individual consent by participants was deemed to not be required due to the population-  
32 based de-identified form of the data released to the researchers.  
33  
34  
35

### 36 **Data sharing statement**

37  
38 The data that support the findings of this study are not available. It was a condition of the  
39 agreement between the data linkage units and the researchers that the dataset remain  
40 confidential. We are not permitted to make any part of the linked data available to any  
41 party outside those named on the research team who have been granted access.  
42  
43  
44  
45  
46  
47  
48  
49  
50  
51  
52  
53  
54  
55  
56  
57  
58  
59  
60

## INTRODUCTION

In Australia, most births occur in hospitals (97.5% in 2015), with some variation across the eight states and territories (for example, 91% in the Australian Capital Territory to 99% in Victoria).<sup>1</sup> Women with uncomplicated pregnancies (women who are healthy without medical or obstetric risk factors <sup>2</sup> [see the Methods for the definition]) and are planning hospital births in the public health system receive antenatal care from hospital-based midwives and doctors, sometimes within continuity of care models, and often in partnership with local general practitioners. Hospital midwives attend their labour and birth, with medical involvement as required or in line with local protocols. In the private health system (where 25% of births take place), women receive antenatal care from private obstetricians or midwives employed by obstetricians. Hospital midwives attend their labour and birth and the obstetrician attends during the labour and is usually at the birth.<sup>3,4</sup> There are some differences across Australia in the way care is provided, especially the local guidelines and the choices available to women. The availability of different models of care varies across the country.

While most births take place in hospital labour wards or birth suites, a small proportion (1.8% nationally) take place in midwife-run birth centres.<sup>1</sup> In Australia these birth centres are typically co-located with hospitals (similar to alongside midwifery units in other countries) although a small number of stand-alone birth centres exist.<sup>5</sup> Birth centres typically provide midwifery continuity of care to women with uncomplicated pregnancies in a home-like environment and are well integrated into the health system.

Less than 0.3% of Australian births take place at home, ranging from 0.1% of births in New South Wales to 0.6% in the Northern Territory.<sup>1,6</sup> Most planned home births are attended by midwives working in private practice, some of whom also attend women in birth centres and hospitals. The integration of private homebirth services varies across the country. A small number of hospitals and birth centres offer home births through the public health system.<sup>7</sup> An evaluation of the outcomes of publicly funded models providing homebirth showed that the rate of stillbirth and early neonatal mortality was low, at 1.7 per 1000 births. However, the sample size did not have sufficient power to generate a conclusion about safety.<sup>8</sup>



1  
2  
3 We have conducted a systematic review to examine maternal and perinatal outcomes  
4 associated with planned place of birth for women with uncomplicated pregnancies in high-  
5 income countries.<sup>9</sup> In this analysis of 28 studies from 13 countries, women who planned  
6 hospital births had significantly higher rates of perineal trauma and instrumental/caesarean  
7 birth than those who planned other birth places. Overall, there was no significant difference  
8 in the odds of intrapartum stillbirth according to place of birth (compared with planned  
9 hospital births, planned homebirth: OR=0.94; 95% CI: 0.76-1.17; planned birth centre  
10 OR=0.66; 95% CI: 0.32-1.34) or in early neonatal deaths (planned home birth OR=1.00; 95%  
11 CI: 0.78-1.27; planned birth centre 0.87; 95% CI: 0.29-2.61).

12  
13  
14  
15  
16  
17  
18  
19  
20  
21 Previous Australian state-based studies into place of birth have showed variation in findings.  
22 In New South Wales (the most populous state accounting for around 30.9% of births)<sup>10</sup>,  
23 women without pregnancy complications who planned a home or birth centre birth had  
24 significantly higher proportions of normal birth than those planning hospital births (home  
25 97.4% vs birth centre 86.0% vs hospital 73.9%). There was no significant difference in  
26 neonatal mortality although the overall sample size (n= 258 161, including only 742 planned  
27 home births), had insufficient power for these relatively rare outcomes. In South Australia  
28 (SA) (297 192 planned hospital births and 1141 [0.38%] planned home births), another study  
29 found lower intervention rates and equivalent perinatal death rates in home births  
30 compared to hospital births. However, the odds of an intrapartum fetal death were  
31 significantly higher among planned home births (two deaths in the planned home birth  
32 group; AOR 7.42; 95% CI: 1.53–35.87). This study included some women with recognised risk  
33 factors in the home birth group including twins.<sup>11</sup> Large-scale studies in other countries  
34 show similar perinatal outcomes between births planned at home and in hospitals (and birth  
35 centres where these exist) with some differences for primiparous women.<sup>12-15</sup>

36  
37  
38  
39  
40  
41  
42  
43  
44  
45  
46  
47  
48  
49 There is less controversy about birth centres compared with homebirth. Data from  
50 Australian birth centres indicate lower rates of maternal morbidity,<sup>16</sup> intervention, preterm  
51 birth and low birthweight compared with hospital births for women with similar risk  
52 profiles.<sup>17</sup> One study identified no significant differences by birth place in perinatal  
53 mortality<sup>17</sup> and another reported lower perinatal mortality in birth centre births, although  
54 based on actual rather than intended birth place.<sup>18</sup> A smaller hospital-based study found no  
55 significant difference in caesarean section rates between the birth centre and labour ward  
56  
57  
58  
59  
60

1  
2  
3 for women with uncomplicated pregnancies.<sup>19</sup> Two other birth centre studies reported  
4 higher rates of spontaneous vaginal birth and lower rates of adverse infant outcomes  
5 (neonatal intensive care unit [NICU] admission, low birthweight) compared to hospital  
6 births.<sup>20,21</sup>  
7  
8  
9

10  
11 The safety of place of birth continues to be questioned in Australia.<sup>22</sup> To generate evidence  
12 to assist policy makers, health practitioners, and pregnant women and their families to  
13 make informed decisions about place of birth, we undertook a national study combining  
14 data from all eight Australian jurisdictions to examine the outcomes for women with  
15 uncomplicated pregnancies related to three different birth settings. This is the first national  
16 study on the comparative safety of different planned birth settings in Australia.  
17  
18  
19  
20  
21  
22

### 23 **Aim and objectives**

24  
25 The study aimed to compare the perinatal and maternal outcomes for Australian women  
26 with uncomplicated pregnancies according to planned place of birth, that is, hospital labour  
27 wards, birth centres or at home. Outcomes investigated included normal labour and birth,  
28 mode of birth, interventions during labour, postpartum maternal complications and  
29 perinatal mortality and morbidity. We defined *uncomplicated pregnancy* as a singleton fetus  
30 in cephalic presentation between 37 and 41 completed weeks' gestation and free of known  
31 and recorded complications. Exclusions are detailed in Box 1.  
32  
33  
34  
35  
36  
37  
38  
39

## 40 **METHODS**

### 41 **Study design**

42  
43 The study used a population-based retrospective design, linking and analysing routinely  
44 collected electronic data from multiple sources about births between 2000 and 2012 to  
45 women with uncomplicated pregnancies. We compared outcomes from three cohorts  
46 comprising women who were as comparable as possible given the available data. In  
47 Australia, homebirth and birth centre options are mostly restricted to women who meet  
48 specific criteria, that is, have an uncomplicated pregnancy and no relevant past medical or  
49 obstetric history. We therefore endeavoured to ensure that the hospital cohort shared the  
50 same characteristics, clinically if not demographically and applied the same filters on all  
51 three cohorts to increase the similarity between groups.  
52  
53  
54  
55  
56  
57  
58  
59  
60

1  
2  
3 The study was approved by a university Human Research Ethics Committee (HREC). HRECs in  
4 each state and territory also approved access to anonymised linked data (see  
5 Supplementary File 1).  
6  
7  
8

### 9 **Patient and Public Involvement**

10  
11 Patients and the public were not involved in the design or conduct of the study.  
12  
13

### 14 **Data sources**

15  
16 All eight Australian states and territories compile electronic perinatal datasets with items on  
17 maternal characteristics, labour, birth, and perinatal outcomes in the immediate  
18 postpartum period, that is, during the birth admission. However, to eliminate women with  
19 conditions that made them fall out of the uncomplicated criteria from the sample and to  
20 examine deaths and major morbidity requiring hospitalisation beyond the perinatal period,  
21 we examined additional data sources on deaths and hospital admissions nine months before  
22 and twelve months following birth. This study used linked anonymous data on all available  
23 mothers and infants from the following sources:  
24  
25  
26  
27  
28  
29  
30  
31

- 32 • *Perinatal Data Collection (PDC)* – maternal and infant data on all live births and  
33 stillbirths from 20 weeks' gestation or >400g birth weight;
- 34 • *Admitted Patient Data Collection (APDC)* – services provided to all individuals  
35 admitted to public and private hospitals, using the International Classification of  
36 Diseases – Australian modifications (ICD-10-AM)<sup>23</sup> for clinical data;
- 37 • *Registry of Births, Deaths and Marriages (RBDM)* – all registered births and deaths;
- 38 • *Australian Bureau of Statistics (ABS)* – data on deaths including primary cause of  
39 death (only for NSW and Queensland).  
40  
41  
42  
43  
44  
45  
46  
47

48 It was not possible to obtain data from all sources for all states and territories for the full  
49 study period due to differences in data collection systems. Table footnotes indicate the  
50 scope of data for each variable. In addition, not all states and territories provided data on  
51 maternal mortality.  
52  
53  
54

### 55 **Definitions**

56  
57  
58  
59  
60

1  
2  
3 The definition of *uncomplicated pregnancies* (those without medical or obstetric risk  
4 factors) was determined a priori by the research team. For the most part, this used the  
5 Australian College of Midwives Guidelines for Consultation and Referral<sup>2</sup> as a basis for the  
6 description of uncomplicated pregnancies.  
7  
8  
9

10  
11 < Insert Box 1 here >  
12  
13

14 *Planned place of birth* incorporates three possible locations: home, birth centre, and  
15 hospital. *Homebirths* are instances where women intend to give birth outside a formal  
16 health facility, usually their own home, and receive care from a registered midwife, funded  
17 through either the public or private health system or self-funded. *Birth centres* provide a  
18 home-like birth setting and are run by midwives. They can be located within a hospital  
19 campus (alongside unit) or in a separate area (stand-alone unit) and require transfer to the  
20 main hospital service for access to interventions such as epidural analgesia or caesarean  
21 section. *Hospital births* take place in the labour ward or birth suite (terms vary across the  
22 country) of either a public or private hospital, and women are attended by midwives,  
23 obstetricians and/or general practitioner (GP) obstetricians.  
24  
25  
26  
27  
28  
29  
30  
31  
32

33 The timing of the decision about birth setting is critical within the birthplace literature.  
34 While women choose a birth location early in their pregnancy, clinical factors may preclude  
35 them from achieving this intention. If they develop complications, they may no longer be  
36 eligible to give birth in a birth centre or at home. These women are excluded from  
37 comparisons of outcome by birth setting if they transfer to hospital care prior to labour.  
38 Ideally, researchers should identify planned place of birth at labour onset, to ensure that all  
39 participants have a similar level of clinical complexity. All Australian data collections record  
40 intended place of birth, but the majority did not indicate intention at labour onset.  
41 Therefore, the current study analyses data on planned place of birth identified at an  
42 undetermined time in the pregnancy, as close to labour as we were able to identify. The  
43 screening process eliminated women with many of the risk factors that would have  
44 prompted antenatal transfer from a birth centre or homebirth.  
45  
46  
47  
48  
49  
50  
51  
52  
53  
54

55  
56 Box 2 provides the definitions of the maternal and perinatal outcomes.  
57

58 < Insert Box 2 here >  
59  
60

## Data linkage

Independent data linkage units (DLU) in each state and territory matched information from the four data sources (where available), using probabilistic linkage techniques.<sup>24,25</sup> This generated de-identified health records linking information from multiple datasets about the same individuals. This process yields the best available data on maternal and infant health status. However, it is not infallible and has estimated false positive and false negative rates of 0.5% each.<sup>26</sup>

Cross-jurisdictional data linkage was not possible, as independent DLUs had diverging protocols for maintaining patient privacy. We therefore applied to the individual data custodians for access to the linked data, through the six DLUs (data linkage for the Australian Capital Territory and the Northern Territory is provided by NSW and SA units respectively). Data were combined on relevant variables, where comparable, into a national dataset. Box 3 provides details on the datasets. Our approach to the data linkages and combining issues are detailed elsewhere.<sup>27</sup>

< Insert Box 3 here >

## Data cleaning, screening and cohort selection

Because the data collections were developed separately in each state and territory (except ABS collections), they had different characteristics and components. In particular, several PDC and APDC variables differed in name and type by jurisdiction. Even within the same state, some variable definitions changed over the study period, with items merged or split into multiple variables over time. The researchers scrutinised definitions to ensure accurate matching between variables with different names and attributes into a standardised dataset. The variables on mode of birth and intervention are all as defined by each state or territory.

Our broad request to state DLUs specified data on women with singleton pregnancies and a cephalic presentation at 37 to 41 completed weeks' gestation. Datasets arrived in different formats and met our criteria to varying extents. We then applied more specific inclusion and exclusion criteria (Box 1) to generate the sample.

## Data analysis

Data were converted to SPSS Version 24, then grouped according to women's planned place of birth for intention to treat analysis. Descriptive statistics were generated and reported using percentages (or incidence per 1000 births for postpartum complications and perinatal outcomes).

Categorical variables were initially compared using chi-square tests. For continuous data such as maternal age and gestation week, we used univariate general linear model for analysis of variance (ANOVA) to examine the differences between the means. Odds ratios comparing each outcome by planned place of birth were calculated using logistic regression, adjusted for maternal age, maternal country of birth (Australia or elsewhere), gestational age and parity (dichotomised as primiparous vs multiparous) (adjusted odds ratio=AOR). These confounders were decided *a priori* based on what is known in the literature to affect outcomes. Percentages or proportions (events per 1000) were computed for the incidence of events at each birth setting. We present analysis stratified by parity (first baby versus other) for normal labour and birth and perinatal mortality.

No imputation was made to missing data. All calculations in regression and rates were computed based on non-missing data. Wherever necessary, sizes of missing data (not stated/inadequately described) on related variables were reported. The analysis reports 99% confidence intervals. The statistical significance level was set at  $p < 0.01$  to have more precision due to the large sample size. Ethics approval requirements prevented us reporting cell sizes of less than five to maintain confidentiality. Further details on the methods is presented elsewhere.<sup>27</sup>

## RESULTS

### Demographic characteristics

The sample comprised 1 251 420 births that occurred between 1 January 2000 and 31 December 2012 to women with full-term, singleton pregnancies without complications. Of these, 1 171 703 (93.6%) births were planned in hospital labour wards (referred to as 'hospital' births), 71 505 (5.7%) in a birth centre and 8212 (0.7%) at home.

1  
2  
3 Women planning to give birth in hospital labour wards were more likely to be younger,  
4 having their first birth (primiparous), of a shorter gestation (less than 40 weeks) or non-  
5 Australian-born than those planning birth centre or home births (Table 1).  
6  
7

8  
9  
10 <Insert Table 1 here>

### 11 **Mode of birth, intervention and analgesia by planned place of birth**

12  
13  
14  
15 Planned birth at home or in a birth centre was associated with normal labour and birth  
16 more often than planned hospital birth. Women planning a birth centre birth were almost  
17 three times as likely (AOR 2.72, 99% CI 2.63-2.81) and women planning a home birth were  
18 almost six times as likely (AOR 5.91, 99% CI 5.15-6.78) to have a normal birth (Table 2). The  
19 odds for primiparous and multiparous women were similar. Overall, the proportion of  
20 women having a normal labour and birth were high (79% to 95% across the groups).  
21  
22  
23  
24  
25

26  
27 <Insert Table 2 here>

28  
29 Women planning hospital births were more likely to experience interventions in birth.  
30 Compared with planned hospital births, births planned in other settings had significantly  
31 lower odds of: vacuum extraction (birth centre AOR 0.42; 99% CI 0.40-0.44 and homebirth  
32 AOR 0.18; 99% CI 0.14-0.24), forceps (birth centre AOR 0.54; 99% CI 0.50-0.58 and  
33 homebirth AOR 0.21; 99% CI 0.14-0.31) and intrapartum caesarean section (birth centre  
34 AOR 0.45; 99% CI 0.43-0.48 and homebirth AOR 0.29; 99% CI 0.24-0.35). Overall, the rates of  
35 interventions in the whole cohort were low with a rate of intrapartum caesarean section of  
36 only 8%.  
37  
38  
39  
40  
41  
42  
43

44  
45 Women who planned a birth centre or home birth were significantly more likely to have an  
46 intact perineum (birth centre AOR 1.16; 99% CI 1.14-1.19 and homebirth AOR 2.07; 99% CI  
47 1.95-2.20) than those planning a hospital birth. Compared with planned hospital births, 3<sup>rd</sup>  
48 or 4<sup>th</sup> degree perineal tears were less likely in planned home births (AOR 0.53; 99% CI 0.39-  
49 0.73) and more likely in planned birth centre births (AOR 1.17; 53% CI 1.09-1.25). The odds  
50 of episiotomy were much lower in both non-hospital groups (birth centre AOR 0.37; 99% CI  
51 0.36-0.39 and homebirth AOR 0.13; 99% CI 0.10-0.15) than in planned hospital births. The  
52 odds of other interventions such as oxytocin augmentation and epidural or spinal analgesia  
53 were lower in planned birth centre or home births (Table 3).  
54  
55  
56  
57  
58  
59  
60

1  
2  
3 <Insert Table 3 here>  
4  
5

### 6 **Maternal postpartum complications**

7

8 Women who planned to give birth in a birth centre were less likely to have a PPH requiring a  
9 blood transfusion than women who planned hospital births (AOR 0.66; 99% CI 0.56-0.78).  
10 There was no significant difference in the odds for women who planned a home birth (AOR  
11 1.08; 99% CI 0.73-1.60). The odds for admission to an intensive care or a high dependency  
12 unit were lower for the planned birth centre group (AOR 0.42; 99% CI 0.31-0.56) but no  
13 different for the planned home birth group (AOR 0.41; 99% CI 0.15-1.08). However, the  
14 absolute number of admissions is small (Table 4). There were no significant differences  
15 between the groups in the odds of readmission to hospital within a month.  
16  
17  
18  
19  
20  
21  
22

23  
24 <Insert Table 4 here>  
25

### 26 **Perinatal outcomes by planned place of birth**

27

28 Although the planned homebirth group had higher odds ratios for intrapartum stillbirth and  
29 early neonatal death than the other planned places of birth, the differences were not  
30 statistically significant. Combined data on stillbirth during labour, early and late neonatal  
31 death indicate that indicate that perinatal death is no more likely to occur after planned  
32 homebirth than in hospital birth (AOR 1.55; 99% CI 0.65-3.69), although the absolute  
33 number of deaths was very small (9/8182). Similarly, there was no significant difference for  
34 women planning a birth centre birth (AOR 0.84; 99% CI 0.60-1.19). When women were  
35 stratified by parity, there were no significant differences between any of the groups in the  
36 odds of perinatal mortality.  
37  
38  
39  
40  
41  
42  
43  
44  
45

46 Women who planned a birth centre birth were more likely to have their baby admitted to  
47 the NICU and/or SCU for longer than 48 hours (AOR 1.24; 99% CI 1.10-1.39) than women  
48 who planned hospital births. This trend was not seen in planned home births (AOR 0.63;  
49 99% CI 0.39-1.01). There were no significant differences between the three groups in the  
50 odds of readmission of the baby to hospital within 28 days (Table 5).  
51  
52  
53  
54  
55

56 <Insert Table 5 here>  
57

## 58 **DISCUSSION**

59  
60



1  
2  
3 This study, the first in Australia, has examined maternal and perinatal outcomes nationally  
4 by planned place of birth including all eight states and territories. Our study has  
5 demonstrated results consistent with several international studies of planned place of  
6 birth.<sup>12,13,15</sup> Normal births were more likely for women who planned birth in birth centres or  
7 at home than in a hospital. Women who planned to give birth at home were slightly older  
8 than women planning hospital or birth centre births, but despite this, had consistently lower  
9 rates of intervention.  
10  
11

12  
13  
14  
15  
16  
17 The unadjusted perinatal mortality ratio for planned hospital births was 0.8 per 1000 live  
18 births compared with 0.4 in planned birth centre births and 1.1 in planned home births,  
19 although the absolute risks were very small with low numbers of deaths overall. These  
20 differences by place of birth were neither statistically significant for all women nor for  
21 cohorts stratified by parity. However, the differences are more marked in primiparous  
22 women (0.8 per 1000 in planned hospital vs 1.7 per 1000 in planned homebirth) than  
23 multiparous women (0.7 per 1000 in planned hospital vs 0.8 per 1000 in planned  
24 homebirth). Given the small number of deaths in the planned homebirth group (n=9) this  
25 may be a chance finding over a long period of time (13 years). However, it is similar to the  
26 findings of the Birthplace in England study, which found a statistically significant higher odds  
27 of a composite outcome combining perinatal mortality and selected early neonatal  
28 morbidities among primiparous women planning home birth.<sup>12</sup> This highlights the need to  
29 explain the risks to women in absolute terms, as this is likely to be more helpful in assisting  
30 decision-making.  
31  
32  
33  
34  
35  
36  
37  
38  
39  
40  
41  
42

43  
44 There were two negative findings in relation to birth centre outcomes, firstly, a significantly  
45 higher rate of severe perineal trauma (AOR 1.17; 99% CI 1.09-1.25) compared with planned  
46 hospital births. Another Australian study<sup>17</sup> and one in New Zealand also found higher rates  
47 of perineal trauma in birth centres.<sup>28</sup> However, other research found no significant  
48 differences in perineal outcomes, for example in studies in Norway,<sup>29,30</sup> Denmark,<sup>31</sup>  
49 Australia<sup>32</sup> or England.<sup>33</sup> The higher rate of severe perineal trauma may be related to the use  
50 of birth stools, more common in Australian birth centres but less frequently in hospitals or  
51 at home. Birth stools have been linked to higher rates of severe perineal trauma compared  
52 with other birth positions or waterbirth.<sup>34</sup> The higher rates of trauma could also be due to  
53 better case ascertainment or lower rates of episiotomy.  
54  
55  
56  
57  
58  
59  
60

1  
2  
3 The study also found higher rates of infant admission to NICU/SCN for greater than 48 hours  
4 (AOR 1.24; 99% CI 1.10-1.39) among planned birth centre births. This is different from other  
5 research, which either found higher rates associated with planned hospital births<sup>17,28</sup> or else  
6 no statistically significant differences in NICU admission rates from birth centres and  
7 hospital births.<sup>29,31,35</sup> The admissions to the NICU or SCN in the current study are low in  
8 absolute terms (1 per 100 for birth centre births) but higher than planned hospital births.  
9 This requires ongoing examination to determine possible reasons and ways to reduce the  
10 rate.  
11  
12  
13  
14  
15  
16  
17  
18

### 19 **Strengths and limitations**

20  
21 This study is the first to comprehensively examine maternal and perinatal outcomes from  
22 three birth settings across Australia. It used a population-based sample consisting of women  
23 with uncomplicated pregnancies. The large sample size was sufficient to detect differences  
24 between the three groups, although the numbers of homebirth nationally, even over this  
25 time period, were comparatively small (i.e. 8212 only 0.7% of the total sample).  
26  
27  
28  
29  
30

31 The context of homebirth in Australia means there are still low numbers of women choosing  
32 homebirth and hence small numbers in this population. Private practising midwives do not  
33 have access to professional indemnity insurance which means the option for women is  
34 limited although still available in some parts of the country. Some private practising  
35 midwives in some states have visiting rights to hospitals but this is not universal leading to a  
36 lack of potential lack of integration. The publicly funded home birth models are relatively  
37 few (no more than 20 services across the country) and cater for small numbers of women.  
38 The policy and professional context has not been highly supportive of homebirth which has  
39 made scaling up of public services difficult.  
40  
41  
42  
43  
44  
45  
46  
47

48 Women with uncomplicated pregnancies were defined consistently across all three cohorts  
49 in the dataset. However, merging linked data from multiple jurisdictions created several  
50 challenges and potential shortcomings, including missing responses, inconsistent variable  
51 definitions and limited data from some states.<sup>27</sup> For example, Queensland's data collection  
52 only covered 2007-2012, resulting in under-representation: 9.6% of the combined sample,  
53 compared with 20.4% of Australian births in 2012.<sup>36</sup> The linked data sets also could not  
54 account for women who may have moved to another state or territory in the follow-up time  
55  
56  
57  
58  
59  
60

1  
2  
3 frame. In addition, state and territory-based data collections have inconsistent variables on  
4 other potential demographic factors such as maternal education, socioeconomic status or  
5 body mass index, limiting the variables available for controlling the analysis.  
6  
7

8  
9 Although we eliminated unintended home births among women intending hospital or birth  
10 centre births (births before arrival), the home birth data do not always record whether or  
11 not a qualified health professional attended. Within the constraints of the data available, we  
12 have only included births attended by a health professional. Moreover, different states  
13 recorded birthplace intentions at different times. Although this means that intended birth  
14 place is not always recorded at onset of labour, the scrupulous process of data cleaning and  
15 categorising eliminated most women with risk factors which would have rendered them  
16 ineligible for birth centre or home births. Thus, the recorded birthplace intention was as  
17 close as possible to that at labour onset. However, there is a possibility that some planned  
18 birth centre/home births were erroneously classified as planned hospital births.  
19  
20  
21  
22  
23  
24  
25  
26  
27

28 Some data items were collected inconsistently across the jurisdictions, for example, transfer  
29 from home to hospital after the onset of labour. This was either because the data item did  
30 not exist or because it only recorded 'transfer', which could have been at any time during  
31 pregnancy. Therefore, we were unable to report on intrapartum transfer rates.  
32  
33  
34  
35

36 Inconsistencies in the data from different jurisdictions also affected the data analysis. The  
37 regression analysis incorporated very few potential confounders, limited to those for which  
38 consistent data were available nation-wide (i.e. maternal age, gestational age, parity and  
39 whether born in Australia or not). Socio-economic status is also inconsistently collected  
40 across the country, as is maternal BMI and education, so we were unable to adjust for these  
41 factors.  
42  
43  
44  
45  
46  
47

48 It is possible that there remains some residual *unobservable differences in the groups*. It is  
49 possible that women planning to give birth in a birth centre or at home are different from  
50 those planning a hospital birth in a number of ways, including their motivation, attitudes to  
51 intervention and approach to birth. These are not able to be measured but may impact on  
52 the findings in relation to interventions and outcomes.  
53  
54  
55  
56  
57

## 58 **CONCLUSION**

59  
60

1  
2  
3 This study provides evidence on the safety of births planned in hospital, birth centre and at  
4 home across all states and territories in Australia by comparing cohorts of women with  
5 uncomplicated pregnancies. Inconsistencies between state-based datasets as described  
6 limited the number of variables available for analysis. However, for healthy women with  
7 uncomplicated pregnancies, planned birth centre births resulted in high rates of normal  
8 labour and birth, low rates of most maternal complications, and comparable perinatal  
9 mortality outcomes. Women planning home birth also had similarly positive maternal  
10 outcomes with no statistically significant differences in the rate of perinatal mortality or  
11 NICU admission. In absolute terms, the numbers of deaths were small, although the rate of  
12 perinatal mortality was higher among primiparous women who planned homebirths than  
13 their multiparous counterparts.  
14  
15  
16  
17  
18  
19  
20  
21  
22  
23  
24  
25  
26  
27  
28  
29  
30  
31  
32  
33  
34  
35  
36  
37  
38  
39  
40  
41  
42  
43  
44  
45  
46  
47  
48  
49  
50  
51  
52  
53  
54  
55  
56  
57  
58  
59  
60

**Box 1: Exclusion criteria**

Women were excluded if the baby was:

- Born before 37 and after 41 completed weeks' gestation;
- Born before arrival for a planned birth at hospital or birth centre;
- Diagnosed antenatally with a congenital abnormality (all ICD-10-AM Q codes)

Women were also excluded if they had:

- Received no antenatal care;
- A previous caesarean section;
- A breech or non-vertex presentation;
- Labour induced for any reason;
- An elective caesarean section (pre-labour);
- Pre-existing (essential) and/or pregnancy-related hypertension;
- Pre-existing or gestational diabetes;
- Antepartum haemorrhage or any other relevant pregnancy complications
- ICD-10-AM Diagnosis
  - O10 Pre-existing hypertension complicating pregnancy, childbirth and the puerperium
  - O11 Pre-eclampsia superimposed on chronic hypertension
  - O13 Gestational [pregnancy-induced] hypertension
  - O14 Pre-eclampsia
  - O15 Eclampsia
  - O24 Diabetes mellitus in pregnancy
  - O30 Multiple gestation
  - O31.2 Continuing pregnancy after intrauterine death of one fetus or more
  - O36.4 Maternal care for intrauterine death
  - O42 Premature rupture of membranes
  - O46 Antepartum haemorrhage
  - O75.5 Delayed delivery after artificial rupture of membranes
  - O75.7 Vaginal delivery following previous caesarean section
  - P95 Fetal death of unspecified cause

**Box 2: Maternal and perinatal outcomes****Maternal outcomes**

*Normal labour and birth:* defined as spontaneous labour, cephalic presentation, without epidural, spinal or general anaesthesia, forceps, vacuum extraction, episiotomy or caesarean section.

*Mode of birth:* caesarean section, forceps birth, vacuum extraction, and normal vaginal birth (non-instrumental).

*Procedures during labour and birth:* episiotomy, epidural or spinal analgesia, oxytocin augmentation.

*Perineal status:* severe perineal trauma (3<sup>rd</sup> or 4<sup>th</sup> degree tear)

*Postpartum complications:* postpartum haemorrhage (PPH) requiring a transfusion, admission to intensive care or high dependency unit for more than 48 hours and hospital readmission within 28 days.

**Perinatal outcomes:**

*Perinatal mortality:* intrapartum stillbirth, early neonatal death (0-7 days), late neonatal death (8-28 days).

*Perinatal complications:* Admission to special care or neonatal intensive care unit (NICU) for more than 48 hours and readmission to hospital within 28 days.

**Box 3: Proportion of births included in sample, by state and territory**

| State or Territory                                     | NSW       | QLD       | VIC       | SA        | WA        | TAS       | ACT       | NT        | Total     |
|--------------------------------------------------------|-----------|-----------|-----------|-----------|-----------|-----------|-----------|-----------|-----------|
| Years of data provided                                 | 2000-2012 | 2007-2012 | 2000-2012 | 2000-2012 | 2000-2012 | 2005-2012 | 2000-2012 | 2000-2012 |           |
| Number of births which met the criteria for this study | 507 017   | 114 245   | 370 356   | 69 356    | 130 848   | 19 915    | 23 484    | 16 199    | 1 251 420 |
| Proportion of total study sample                       | 40.5%     | 9.1%      | 29.6%     | 5.5%      | 10.5%     | 1.6%      | 1.9%      | 1.3%      | 100%      |

Key to the states and territories: NSW - New South Wales; Qld - Queensland, VIC – Victoria; SA – South Australia; WA – Western Australia; TAS – Tasmania; ACT – Australian Capital Territory; NT – Northern Territory

Table 1: Demographic characteristics by planned place of birth

|                                         | Hospital                     | Birth Centre             | Home                   |
|-----------------------------------------|------------------------------|--------------------------|------------------------|
| <b>All women</b>                        | <b>1 171 703<br/>(93.6%)</b> | <b>71 505<br/>(5.7%)</b> | <b>8212<br/>(0.7%)</b> |
| <b>Maternal age (years) - mean (sd)</b> | 29.0 (5.6)                   | 29.8 (5.3)               | 31.8 (5.0)             |
| <b>Maternal age (years)</b>             |                              |                          |                        |
| <20                                     | 61 451 (5.2%)                | 2044 (2.9%)              | 71 (0.9%)              |
| 20-24                                   | 200 386 (17.1%)              | 10 116 (14.1%)           | 548 (6.7%)             |
| 25-29                                   | 348 785 (29.8%)              | 21 579 (30.2%)           | 2047 (24.9%)           |
| 30-34                                   | 365 022 (31.2%)              | 23 949 (33.5%)           | 3058 (37.2%)           |
| 35-39                                   | 167 803 (14.3%)              | 11 931 (16.7%)           | 1997 (24.3%)           |
| ≥40                                     | 28 177 (2.4%)                | 1886 (2.6%)              | 474 (5.8%)             |
| Missing                                 | 79 (0.0%)                    | 0 (0.0%)                 | 17 (0.2%)              |
| <b>Previous pregnancies (≥20weeks)</b>  |                              |                          |                        |
| 0                                       | 494 019 (42.2%)              | 28 891 (40.4%)           | 2295 (27.9%)           |
| 1                                       | 376 047 (32.1%)              | 25 079 (35.1%)           | 2745 (33.4%)           |
| 2                                       | 174 873 (14.9%)              | 11 364 (15.9%)           | 1688 (20.6%)           |
| ≥3                                      | 126 111 (10.8%)              | 6153 (8.6%)              | 1456 (17.7%)           |
| Not stated                              | 653 (0.1%)                   | 18 (0.0%)                | 28 (0.3%)              |
| <b>Gestation* - mean (sd)</b>           | 39.5 (1.0)                   | 39.6 (1.0)               | 39.8 (1.0)             |
| <b>Gestation*</b>                       |                              |                          |                        |
| 37                                      | 54 825 (4.7%)                | 2403 (3.4%)              | 209 (2.5%)             |
| 38                                      | 155 764 (13.3%)              | 7470 (10.4%)             | 724 (8.8%)             |
| 39                                      | 323 179 (27.6%)              | 18 278 (25.6%)           | 1666 (20.3%)           |
| 40                                      | 481 665 (41.1%)              | 29 289 (41.0%)           | 3779 (46.0%)           |
| 41                                      | 156 270 (13.3%)              | 14 065 (19.7%)           | 1834 (22.3%)           |



| <b>Maternal country of birth</b>  |                 |                |              |
|-----------------------------------|-----------------|----------------|--------------|
| Australia                         | 889 550 (75.9%) | 56 201 (78.6%) | 6822 (83.1%) |
| Others                            | 276 001 (23.6%) | 15 105 (21.1%) | 1188 (14.5%) |
| Inadequately described/not stated | 6152 (0.5%)     | 199 (0.3%)     | 202 (2.5%)   |

\*Gestation is in completed weeks

Note: Chi-square tests on categorical data within each sub-heading between birth settings yielded statistically significant differences with  $p < 0.001$  in all categories with no missing or not stated data. GLM revealed significant differences at  $p < 0.0001$  between means in all pairwise comparisons.

Percentages may not total exactly 100% due to rounding.

**Table 2: Normal labour and birth<sup>†</sup> by planned place of birth and parity**

| Planned place of birth                | No. events – normal labour and birth <sup>†</sup> | Total number of births | Incidence of events (%) | Unadjusted OR    | Adjusted OR <sup>Æ</sup> |
|---------------------------------------|---------------------------------------------------|------------------------|-------------------------|------------------|--------------------------|
| <b>All women</b>                      | 991 534                                           | 1 250 721              | 79.3                    |                  |                          |
| Hospital                              | 919 974                                           | 1 171 050              | 78.6                    | 1                | 1                        |
| Birth Centre                          | 63 773                                            | 71 487                 | 89.2                    | 2.26 (2.19-2.33) | 2.72 (2.63-2.81)         |
| Home                                  | 7787                                              | 8184                   | 95.1                    | 5.35 (4.69-6.11) | 5.91 (5.15-6.78)         |
| <b>Primiparous women<sup>^^</sup></b> | 322 640                                           | 525 205                | 61.4                    |                  |                          |
| Hospital                              | 298 243                                           | 494 019                | 60.4                    | 1                | 1                        |
| Birth Centre                          | 22 401                                            | 28 891                 | 77.5                    | 2.27 (2.18-2.35) | 2.60 (2.50-2.70)         |
| Home                                  | 1996                                              | 2295                   | 87.0                    | 4.38 (3.73-5.14) | 5.99 (5.09-7.04)         |
| <b>Multiparous women<sup>^^</sup></b> | 668 894                                           | 725 516                | 92.2                    |                  |                          |
| Hospital                              | 621 731                                           | 677 031                | 91.8                    | 1                | 1                        |
| Birth Centre                          | 41 372                                            | 42 596                 | 97.1                    | 3.01 (2.79-3.24) | 3.27 (3.03-3.53)         |
| Home                                  | 5791                                              | 5889                   | 98.3                    | 5.26 (4.04-6.83) | 5.86 (4.50-7.62)         |

<sup>Æ</sup> Logistic regression adjusted for maternal age, country of birth, gestational age and parity at 99% CI.

<sup>†</sup> Normal labour and birth – spontaneous labour, no epidural or spinal, general anaesthesia, forceps, vacuum extraction, episiotomy or caesarean section.

<sup>^^</sup> Parity refers to previous pregnancies >20 weeks and is dichotomised.

Cases with missing data were not included in rates or regression calculations

**Table 3: Mode of birth, intervention rates and perineal outcomes by planned place of birth**

| Intervention and planned place of birth        | Number of events | No of births | Incidence of events (%) | Unadjusted OR    | Adjusted OR <sup>AE</sup> |
|------------------------------------------------|------------------|--------------|-------------------------|------------------|---------------------------|
| <b>Normal vaginal birth</b>                    | 992 118          | 1 251 420    | 79.3                    |                  |                           |
| Hospital                                       | 920 514          | 1 171 703    | 78.6                    | 1                | 1                         |
| Birth Centre                                   | 63 790           | 71 505       | 89.2                    | 2.26 (2.19-2.33) | 2.72 (2.63-2.81)          |
| Home                                           | 7814             | 8212         | 95.2                    | 5.36 (4.69-6.12) | 5.91 (5.15-6.78)          |
| <b>Vacuum extraction</b>                       | 88 586           | 1 251 420    | 7.1                     |                  |                           |
| Hospital                                       | 85 975           | 1 171 703    | 7.3                     | 1                | 1                         |
| Birth Centre                                   | 2503             | 71 505       | 3.5                     | 0.44 (0.42-0.47) | 0.42 (0.40-0.44)          |
| Home                                           | 108              | 8212         | 1.3                     | 0.19 (0.15-0.24) | 0.18 (0.14-0.24)          |
| <b>Forceps birth</b>                           | 56 332           | 1 251 420    | 4.5                     |                  |                           |
| Hospital                                       | 54 451           | 1 171 703    | 4.6                     | 1                | 1                         |
| Birth Centre                                   | 1820             | 71 505       | 2.5                     | 0.54 (0.50-0.57) | 0.54 (0.50-0.58)          |
| Home                                           | 61               | 8212         | 0.7                     | 0.15 (0.11-0.21) | 0.21 (0.14-0.31)          |
| <b>Intrapartum caesarean section</b>           | 94 303           | 1 251 420    | 7.5                     |                  |                           |
| Hospital                                       | 91 238           | 1 171 703    | 7.8                     | 1                | 1                         |
| Birth Centre                                   | 2871             | 71 505       | 4.0                     | 0.50 (0.47-0.52) | 0.45 (0.43-0.48)          |
| Home                                           | 194              | 8212         | 2.4                     | 0.29 (0.24-0.35) | 0.29 (0.24-0.35)          |
| <b>Mode of birth not stated</b>                | 20 081           | 1 251 420    | 1.6                     |                  |                           |
| Hospital                                       | 19 525           | 1 171 703    | 1.7                     | 1                | 1                         |
| Birth Centre                                   | 521              | 71 505       | 0.7                     | 0.43 (0.39-0.49) | 0.41 (0.36-0.46)          |
| Home                                           | 35               | 8212         | 0.4                     | 0.25 (0.16-0.39) | 0.26 (0.17-0.41)          |
| <b>Oxytocin augmentation</b>                   | 199 302          | 1 251 420    | 15.9                    |                  |                           |
| Hospital                                       | 193 229          | 1 171 703    | 16.5                    | 1                | 1                         |
| Birth Centre                                   | 5790             | 71 505       | 8.1                     | 0.45 (0.43-0.46) | 0.41 (0.40-0.43)          |
| Home                                           | 283              | 8212         | 3.4                     | 0.18 (0.15-0.21) | 0.19 (0.16-0.22)          |
| <b>Epidural or spinal analgesia for labour</b> | 166 746          | 1 251 420    | 13.3                    |                  |                           |
| Hospital                                       | 161 796          | 1 171 703    | 13.8                    | 1                | 1                         |
| Birth Centre                                   | 4675             | 71 505       | 6.5                     | 0.44 (0.42-0.45) | 0.41 (0.39-0.43)          |
| Home                                           | 275              | 8212         | 3.3                     | 0.22 (0.18-0.25) | 0.22 (0.19-0.26)          |

|                                                                |         |           |      |                  |                  |
|----------------------------------------------------------------|---------|-----------|------|------------------|------------------|
| <b>Intact perineum*</b>                                        | 308 232 | 1 157 117 | 26.6 |                  |                  |
| Hospital                                                       | 283 887 | 1 080 465 | 26.3 | 1                | 1                |
| Birth Centre                                                   | 20 562  | 68 634    | 30.0 | 1.20(1.17-1.23)  | 1.39(1.36-1.43)  |
| Home                                                           | 3783    | 8018      | 47.2 | 2.51(2.37-2.66)  | 2.72(2.56-2.90)  |
| <b>Episiotomy*</b>                                             | 193 171 | 1 157 117 | 16.7 |                  |                  |
| Hospital                                                       | 187 276 | 1 080 465 | 17.3 | 1                | 1                |
| Birth Centre                                                   | 5688    | 68 634    | 8.3  | 0.43 (0.42-0.45) | 0.37 (0.36-0.39) |
| Home                                                           | 207     | 8018      | 2.6  | 0.13 (0.11-0.15) | 0.13 (0.10-0.15) |
| <b>3<sup>rd</sup> or 4<sup>th</sup> degree perineal trauma</b> | 23 165  | 1 157 117 | 2.0  |                  |                  |
| Hospital *¥                                                    | 21 454  | 1 080 465 | 2.0  | 1                | 1                |
| Birth Centre                                                   | 1641    | 68 634    | 2.4  | 1.21 (1.13-1.29) | 1.17 (1.09-1.25) |
| Home                                                           | 70      | 8018      | 0.9  | 0.43 (0.32-0.59) | 0.53 (0.36-0.73) |

<sup>Æ</sup> Logistic regression adjusted for maternal age, country of birth, gestational age and parity at 99% CI.

\* Denominator = excluded caesarean section

¥ Included episiotomy extensions

Cases with missing data were not included in rates or regression calculations.

Variables on mode of birth and intervention are as defined by each state or territory.

**Table 4: Maternal postpartum complications by planned place of birth**

| Complication and planned place of birth                                                | No of events | No of births | Incidence of events/1000 births | Unadjusted OR    | Adjusted OR <sup>Æ</sup> |
|----------------------------------------------------------------------------------------|--------------|--------------|---------------------------------|------------------|--------------------------|
| <b>Postpartum haemorrhage with blood transfusion</b>                                   | 6518         | 1 251 420    | 5.2                             |                  |                          |
| Hospital                                                                               | 6230         | 1 171 703    | 5.3                             | 1                | 1                        |
| Birth Centre                                                                           | 244          | 71 505       | 3.4                             | 0.64 (0.54-0.76) | 0.66 (0.56-0.78)         |
| Home                                                                                   | 44           | 8212         | 5.4                             | 1.01 (0.68-1.49) | 1.08 (0.73-1.60)         |
| <b>Admission at least 48 hrs to intensive care or high dependency unit<sup>∞</sup></b> | 2602         | 707 221*     | 3.7                             |                  |                          |
| Hospital                                                                               | 2521         | 654 960      | 3.8                             | 1                | 1                        |
| Birth Centre                                                                           | 74           | 47 266       | 1.6                             | 0.41 (0.30-0.55) | 0.42 (0.31-0.56)         |
| Home                                                                                   | 7            | 4995         | 1.4                             | 0.36 (0.14-0.96) | 0.41 (0.15-1.08)         |
| <b>Readmission to hospital (within 28 days)</b>                                        | 917          | 864 865**    | 1.1                             |                  |                          |
| Hospital                                                                               | 843          | 804 667      | 1.0                             | 1                | 1                        |
| Birth Centre                                                                           | 68           | 54 522       | 1.2                             | 1.19 (0.86-1.65) | 1.18 (0.85-1.64)         |
| Home                                                                                   | 6            | 5676         | 1.1                             | 1.01 (0.35-2.90) | 1.08 (0.38-3.12)         |

<sup>Æ</sup> Logistic regression adjusted for maternal age, country of birth, gestational age and parity at 99% CI.

\* Excluded QLD, VIC, NT, ACT, TAS

<sup>∞</sup> Intensive care and high dependency units provided additional care – these were defined by each state and territory

\*\* Excluded VIC, NT

Cases with missing data were not included in rates or regression calculations

Table 5: Perinatal outcomes by planned place of birth and parity<sup>^^</sup>

| Planned place of birth                                         | No. of events | No. of births | Incidence of events/1000 births | Unadjusted OR    | Adjusted OR <sup>Æ</sup> |
|----------------------------------------------------------------|---------------|---------------|---------------------------------|------------------|--------------------------|
| <b>Stillbirth during labour, early and late neonatal death</b> | 921           | 1 251 420     | 0.7                             |                  |                          |
| Hospital                                                       | 880           | 1 171 050     | 0.8                             | 1                | 1                        |
| Birth Centre                                                   | 32            | 71 505        | 0.4                             | 0.60 (0.37-0.95) | 0.64 (0.40-1.02)         |
| Home                                                           | 9             | 8212          | 1.1                             | 1.46 (0.62-3.47) | 1.55 (0.65-3.69)         |
| <b>Primiparous women</b>                                       | 425           | 525 205       | 0.8                             |                  |                          |
| Hospital                                                       | 406           | 494 019       | 0.8                             | 1                | 1                        |
| Birth Centre                                                   | 15            | 28 891        | 0.5                             | 0.63 (0.32-1.24) | 0.65 (0.33-1.27)         |
| Home                                                           | na            | 2295          | na                              | na               | 2.12(0.58-7.82)          |
| <b>Multiparous women</b>                                       | 496           | 725 516       | 0.7                             |                  |                          |
| Hospital                                                       | 474           | 677 031       | 0.7                             | 1                | 1                        |
| Birth Centre                                                   | 17            | 42 596        | 0.4                             | 0.57 (0.30-1.08) | 0.65 (0.34-1.23)         |
| Home                                                           | na            | 5889          | na                              | na               | 1.29 (0.40-4.14)         |
| <b>Stillbirth during labour</b>                                | 399           | 1 251 420     | 0.32                            |                  |                          |
| Hospital                                                       | 378           | 1 171 703     | 0.32                            | 1                | 1                        |
| Birth Centre                                                   | 17            | 71 505        | 0.24                            | 0.74 (0.39-1.40) | 0.78 (0.41-1.48)         |
| Home                                                           | na            | 8212          | na                              | na               | 1.56 (0.42-5.71)         |
| <b>Early neonatal death<sup>1</sup></b>                        | 240           | 881 064*      | 0.27                            |                  |                          |
| Hospital                                                       | 221           | 819 963       | 0.27                            | 1                | 1                        |
| Birth Centre                                                   | 14            | 55 312        | 0.25                            | 0.84 (0.46-1.91) | 0.94 (0.46-1.92)         |
| Home                                                           | na            | 5789          | na                              | na               | 3.18 (0.98-10.30)        |
| <b>Late neonatal death<sup>2</sup></b>                         | 95            | 881 064*      | 0.11                            |                  |                          |
| Hospital                                                       | 94            | 819 963       | 0.11                            | 1                | 1                        |
| Birth Centre                                                   | na            | 55 312        | na                              | na               | 0.19 (0.01-2.50)         |
| Home                                                           | 0             | 5789          | 0.0                             | na               | na                       |
| <b>Admission to SCN and/or NICU &gt;48hrs<sup>3</sup></b>      | 7500          | 881 064*      | 8.51                            |                  |                          |
| Hospital                                                       | 6908          | 819 963       | 8.42                            | 1                | 1                        |
| Birth Centre                                                   | 562           | 55 312        | 10.16                           | 1.21 (1.08-1.35) | 1.24 (1.10-1.39)         |

|                                                           |        |           |       |                  |                  |
|-----------------------------------------------------------|--------|-----------|-------|------------------|------------------|
| Home                                                      | 30     | 5789      | 5.18  | 0.61 (0.38-0.98) | 0.63 (0.39-1.01) |
| <b>Readmission to hospital within 28 days<sup>4</sup></b> | 37 569 | 1 251 420 | 30.02 |                  |                  |
| Hospital                                                  | 35 413 | 1 171 703 | 30.22 | 1                | 1                |
| Birth Centre                                              | 1967   | 71 505    | 27.51 | 0.91 (0.85-0.96) | 0.95 (0.90-1.01) |
| Home                                                      | 189    | 8212      | 23.02 | 0.76 (0.63-0.91) | 0.83 (0.68-1.00) |

<sup>^</sup>Denominator excluded missing parity information. The denominator in the first section of this table has 699 records with missing data for parity. Because this part of the data analysis was stratified by parity, we excluded the women whose parity data were unavailable.

na: cell size <5 so unable to report data or calculate incidence or OR

<sup>1</sup> Early neonatal death: death of a liveborn infant occurring within 7 completed days from the time of birth.

<sup>2</sup> Late neonatal death: death of a liveborn infant occurring after 7 completed days but before 29 completed days.

<sup>3</sup> NICU and SCN were combined due to complexities in the data to separate them out for all states and territories, except the Northern Territory where there was only SCN available and for South Australia where only NICU was available.

<sup>4</sup> For home births, this is defined as admission to hospital following birth within 28 days.

\* Excluded VIC.

<sup>^E</sup> Logistic regression was undertaken with adjustments occurring for maternal age, country of birth, gestational age, and parity at 99% CI. Any case with missing data was excluded from the regression.

<sup>^^</sup> Parity refers to previous pregnancies >20 weeks.

## REFERENCES

1. Australian Institute of Health and Welfare. Australia's mothers and babies 2015 – in brief. Perinatal statistics series no. 33. Cat no. PER 91. Canberra: AIHW; 2017.
2. Australian College of Midwives. National Midwifery Guidelines for Consultation and Referral - 3rd Edition Issue 2. Canberra: Australian College of Midwives; 2015.
3. Homer C. Models of maternity care: evidence for midwifery continuity of care. *Medical Journal of Australia* 2016; **205**: 370-4.
4. Donnelly N, Butler-Henderson K, Chapman M, Sullivan E. The development of a classification system for maternity models of care. *Health Information Management Journal* 2016; **45**(2): 64-70.
5. Monk A, Tracy S, Foureur M, Barclay L. Australian primary maternity units: past, present and future. *Women Birth* 2013; **26**(3): 213-8.
6. ABS. Australian Demographic Statistics. 2018. <http://www.abs.gov.au/ausstats/abs@.nsf/mf/3101.0> (accessed 13 June 2018).
7. Catling-Paull C, Foureur M, Homer C, on behalf of the members of the Publicly-funded Homebirth Consortium. Publicly-funded homebirth models in Australia. *Women & Birth* 2012; **25**: 152-8.
8. Catling-Paull C, Coddington R, Foureur M, Homer CSE. Publicly-funded homebirth in Australia: A review of maternal and neonatal outcomes for the last 6 years. *MJA* 2013; **198**(11): 616-20.
9. Scarf V, Rossiter C, Vedam S, et al. Maternal and perinatal outcomes by planned place of birth among women with low-risk pregnancies in high-income countries: A systematic review and meta-analysis. *Midwifery* 2018; **62**: 240-55.
10. ABS. Births, Australia 2016. 2017. <http://www.abs.gov.au/ausstats/abs@.nsf/Latestproducts/3301.0Main%20Features32016?opendocument&tabname=Summary&prodno=3301.0&issue=2016&num=&view=> (accessed 13 June 2018).
11. Kennare R, Keirse M, Tucker G, Chan A. Planned home and hospital births in South Australia, 1991-2006: differences in outcomes. *Medical Journal of Australia* 2010; **192**: 76-80.
12. Birthplace in England Collaborative Group. Perinatal and maternal outcomes by planned place of birth for healthy women with low risk pregnancies: the Birthplace in England national prospective cohort study. *BMJ* 2011; **343**:d7400 doi: 10.1136/bmj.d7400.
13. de Jonge A, van der Goes B, Ravelli A, et al. Perinatal mortality and morbidity in a nationwide cohort of 529 688 low-risk planned home and hospital births. *BJOG* 2009; **116**(9): 1177-84.
14. de Jonge A, Geerts C, van der Goes B, Mol B, Buitendijk S, Nijhuis J. Perinatal mortality and morbidity up to 28 days after birth among 743 070 low-risk planned home and hospital births: a cohort study based on three merged national perinatal databases. *Bjog* 2015; **122**(5): 720-8.
15. Hutton E, Cappelletti A, Reitsma A, et al. Outcomes associated with planned place of birth among women with low-risk pregnancies. *Cmaj* 2016; **188**(5): E80-90.
16. Laws P, Xu F, Welsh A, Tracy S, Sullivan E. Maternal morbidity of women receiving birth center care in New South Wales: a matched-pair analysis using linked health data. *Birth* 2014; **41**(3): 268-75.
17. Laws P, Tracy S, Sullivan E. Perinatal outcomes of women intending to give birth in birth centers in Australia. *Birth* 2010; **37**(1): 28-36.
18. Tracy S, Dahlen H, Laws P, Wang Y, Tracy M, Sullivan E. Birth centres in Australia. A national population-based study of perinatal mortality associated with giving birth in a birth centre. *Birth* 2007; **34**(3): 194-201.
19. Homer CSE, Davis GK, Petocz P, Barclay L, Matha D, Chapman MG. The obstetric outcomes of low risk women: birth centre versus labour ward. *Australian Journal of Advanced Nursing* 2000; **18**(1): 8-12.



- 1
  - 2
  - 3
  - 4
  - 5
  - 6
  - 7
  - 8
  - 9
  - 10
  - 11
  - 12
  - 13
  - 14
  - 15
  - 16
  - 17
  - 18
  - 19
  - 20
  - 21
  - 22
  - 23
  - 24
  - 25
  - 26
  - 27
  - 28
  - 29
  - 30
  - 31
  - 32
  - 33
  - 34
  - 35
  - 36
  - 37
  - 38
  - 39
  - 40
  - 41
  - 42
  - 43
  - 44
  - 45
  - 46
  - 47
  - 48
  - 49
  - 50
  - 51
  - 52
  - 53
  - 54
  - 55
  - 56
  - 57
  - 58
  - 59
  - 60
20. Monk A, Tracy M, Foureur M, Grigg C, Tracy S. Evaluating Midwifery Units (EMU): a prospective cohort study of freestanding midwifery units in New South Wales, Australia. *BMJ Open* 2014; **4**(10).
21. Ryan M, Roberts C. A retrospective cohort study comparing the clinical outcomes of a birth centre and labour ward in the same hospital. *Australian Midwifery* 2005; **18**(2): 17-21.
22. RANZCOG. College Statement: Homebirths. Melbourne: Royal Australian & New Zealand College of Obstetricians & Gynaecologists; 2017.
23. Australian Consortium for Classification Development. ICD-10-AM/ACHI/ACS. 2018. <https://www.accd.net.au/icd10.aspx> (accessed 4 June 2018).
24. Harron K, Wade A, Gilbert R, Muller-Pebody B, Goldstein H. Evaluating bias due to data linkage error in electronic healthcare records. *BMC Med Res Methodol* 2014; **14**: 36.
25. Meray N, Reitsma J, Ravelli A, Bonsel G. Probabilistic record linkage is a valid and transparent tool to combine databases without a patient identification number. *J Clin Epidemiol* 2007; **60**(9): 883-91.
26. Centre for Health Record Linkage. Quality assurance. 2018. <http://www.cherel.org.au/quality-assurance> (accessed 21 May 2018).
27. Cheah S, Scarf V, Rossiter C, Thornton C, Homer C. Juggling complexity: Undertaking the first national linked data research on perinatal and maternal outcomes in Australia. *Journal of Biomedical Informatics* 2019; **93**: 103152.
28. Davis D, Baddock S, Pairman S, et al. Planned Place of Birth in New Zealand: Does it Affect Mode of Birth and Intervention Rates Among Low-Risk Women? *Birth: Issues in Perinatal Care* 2011; **38**(2): 111-9 9p.
29. Bernitz S, Rolland R, Blix E, et al. Is the operative delivery rate in low-risk women dependent on the level of birth care? A randomised controlled trial. *BJOG: An International Journal of Obstetrics and Gynaecology* 2011: 1357-64.
30. Eide BI, Nilsen AB, Rasmussen S. Births in two different delivery units in the same clinic--a prospective study of healthy primiparous women. *BMC Pregnancy & Childbirth* 2009; **9**: 25.
31. Overgaard C, Moller AM, Fenger-Gron F, et al. Freestanding midwifery unit versus obstetric unit: a matched cohort study of outcomes in low-risk women South Australian group of newborn samples. *BMJ Open* 2011.
32. Homer CS, Thornton C, Scarf VL, et al. Birthplace in New South Wales, Australia: an analysis of perinatal outcomes using routinely collected data. *BMC Pregnancy & Childbirth* 2014; **14**: 206.
33. Birthplace in England Collaborative Group. Perinatal and maternal outcomes by planned place of birth for healthy women with low risk pregnancies: the Birthplace in England national prospective cohort study. *BMJ* 2011.
34. Dahlen H, Dowling H, Tracy M, Schmied V, Tracy S. Maternal and perinatal outcomes amongst low risk women giving birth in water compared to six birth positions on land. A descriptive cross sectional study in a birth centre over 12 years. *Midwifery* 2013; **29**(7): 759-64.
35. Byrne JP, Crowther CA, Moss JR. A randomised controlled trial comparing birthing centre care with delivery suite care in Adelaide, Australia. *ANZJOG* 2000; **40**(3): 268-74.
36. Hilder L, Zhichao Z, Parker M, Jahan S, Chambers G. Australia's mothers and babies 2012 (Perinatal statistics series no. 30. Cat. no. PER 69). Canberra: AIHW; 2014.

1  
2  
3  
4  
5  
6  
7  
8  
9  
10  
11  
12  
13  
14  
15  
16  
17  
18  
19  
20  
21  
22  
23  
24  
25  
26  
27  
28  
29  
30  
31  
32  
33  
34  
35  
36  
37  
38  
39  
40  
41  
42  
43  
44  
45  
46

For peer review only

**SUPPLEMENTARY FILE 1****Ethics approval**

The study received initial ethical approval from the lead university's Human Research Ethics Committee (HREC) – University of Technology Sydney, Australia (university reference number: 2012000167). Each state and territory also provided ethical approval.

| <b>State or territory</b>    | <b>Name of the ethics committee(s)</b>                                                                                      | <b>Number/ID of the approval</b> |
|------------------------------|-----------------------------------------------------------------------------------------------------------------------------|----------------------------------|
| Australian Capital Territory | ACT Health HREC                                                                                                             | ETH 3.14.061                     |
| New South Wales              | NSW Population and Health Services HREC                                                                                     | HREC/14/CIPHS/15                 |
| Northern Territory           | Department of Health of the Northern Territory and the Menzies School of Health Research HREC                               | HREC 2014-2247                   |
| Queensland                   | Qld Health Office of the HREC                                                                                               | HREC/14/QGC/175                  |
| South Australia              | South Australian Health HREC                                                                                                | HREC/14/SAH/117                  |
| Tasmania                     | Tasmania Network HREC                                                                                                       | Ref No: H0015023                 |
| Victoria                     | Department of Health and Human Services – Consultative Council on Obstetric and Paediatric Mortality and Morbidity (CCOPMM) | Ref: 14/12                       |
| Western Australia            | Government of Western Australia, Department of Health HREC                                                                  | HREC 2014/57                     |

1 STROBE Statement—Checklist of items that should be included in reports of *cohort studies*

|                              | Item No | Recommendation                                                                                                                                                                                    | Page no       |
|------------------------------|---------|---------------------------------------------------------------------------------------------------------------------------------------------------------------------------------------------------|---------------|
| Title and abstract           | 1       | (a) Indicate the study's design with a commonly used term in the title or the abstract                                                                                                            | 1             |
|                              |         | (b) Provide in the abstract an informative and balanced summary of what was done and what was found                                                                                               | 1             |
| <b>Introduction</b>          |         |                                                                                                                                                                                                   |               |
| Background/rationale         | 2       | Explain the scientific background and rationale for the investigation being reported                                                                                                              | 6             |
| Objectives                   | 3       | State specific objectives, including any prespecified hypotheses                                                                                                                                  | 8             |
| <b>Methods</b>               |         |                                                                                                                                                                                                   |               |
| Study design                 | 4       | Present key elements of study design early in the paper                                                                                                                                           | 8             |
| Setting                      | 5       | Describe the setting, locations, and relevant dates, including periods of recruitment, exposure, follow-up, and data collection                                                                   | 8-9           |
| Participants                 | 6       | (a) Give the eligibility criteria, and the sources and methods of selection of participants. Describe methods of follow-up                                                                        | 8-9           |
|                              |         | (b) For matched studies, give matching criteria and number of exposed and unexposed                                                                                                               | NA            |
| Variables                    | 7       | Clearly define all outcomes, exposures, predictors, potential confounders, and effect modifiers. Give diagnostic criteria, if applicable                                                          | 9-10          |
| Data sources/<br>measurement | 8*      | For each variable of interest, give sources of data and details of methods of assessment (measurement). Describe comparability of assessment methods if there is more than one group              | 10-11         |
| Bias                         | 9       | Describe any efforts to address potential sources of bias                                                                                                                                         | 10-11         |
| Study size                   | 10      | Explain how the study size was arrived at                                                                                                                                                         |               |
| Quantitative variables       | 11      | Explain how quantitative variables were handled in the analyses. If applicable, describe which groupings were chosen and why                                                                      | 11-12         |
| Statistical methods          | 12      | (a) Describe all statistical methods, including those used to control for confounding                                                                                                             | 11-12         |
|                              |         | (b) Describe any methods used to examine subgroups and interactions                                                                                                                               | 11-12         |
|                              |         | (c) Explain how missing data were addressed                                                                                                                                                       | 12            |
|                              |         | (d) If applicable, explain how loss to follow-up was addressed                                                                                                                                    | NA            |
|                              |         | (e) Describe any sensitivity analyses                                                                                                                                                             | NA            |
| <b>Results</b>               |         |                                                                                                                                                                                                   |               |
| Participants                 | 13*     | (a) Report numbers of individuals at each stage of study—eg numbers potentially eligible, examined for eligibility, confirmed eligible, included in the study, completing follow-up, and analysed | 12<br>Table 1 |
|                              |         | (b) Give reasons for non-participation at each stage                                                                                                                                              | 12            |
|                              |         | (c) Consider use of a flow diagram                                                                                                                                                                | Table 1       |
| Descriptive data             | 14*     | (a) Give characteristics of study participants (eg demographic, clinical, social) and information on exposures and potential confounders                                                          | 12            |
|                              |         | (b) Indicate number of participants with missing data for each variable of interest                                                                                                               | In each table |
|                              |         | (c) Summarise follow-up time (eg, average and total amount)                                                                                                                                       | NA            |

|                          |     |                                                                                                                                                                                                              |                      |
|--------------------------|-----|--------------------------------------------------------------------------------------------------------------------------------------------------------------------------------------------------------------|----------------------|
| Outcome data             | 15* | Report numbers of outcome events or summary measures over time                                                                                                                                               | 12-14                |
| Main results             | 16  | (a) Give unadjusted estimates and, if applicable, confounder-adjusted estimates and their precision (eg, 95% confidence interval). Make clear which confounders were adjusted for and why they were included | 12-14<br>Plus tables |
|                          |     | (b) Report category boundaries when continuous variables were categorized                                                                                                                                    | Tables               |
|                          |     | (c) If relevant, consider translating estimates of relative risk into absolute risk for a meaningful time period                                                                                             | NA                   |
| Other analyses           | 17  | Report other analyses done—eg analyses of subgroups and interactions, and sensitivity analyses                                                                                                               | NA                   |
| <b>Discussion</b>        |     |                                                                                                                                                                                                              |                      |
| Key results              | 18  | Summarise key results with reference to study objectives                                                                                                                                                     | 14-15                |
| Limitations              | 19  | Discuss limitations of the study, taking into account sources of potential bias or imprecision. Discuss both direction and magnitude of any potential bias                                                   | 16                   |
| Interpretation           | 20  | Give a cautious overall interpretation of results considering objectives, limitations, multiplicity of analyses, results from similar studies, and other relevant evidence                                   | 16-17                |
| Generalisability         | 21  | Discuss the generalisability (external validity) of the study results                                                                                                                                        | 15-17                |
| <b>Other information</b> |     |                                                                                                                                                                                                              |                      |
| Funding                  | 22  | Give the source of funding and the role of the funders for the present study and, if applicable, for the original study on which the present article is based                                                | 2                    |

\*Give information separately for exposed and unexposed groups.

**Note:** An Explanation and Elaboration article discusses each checklist item and gives methodological background and published examples of transparent reporting. The STROBE checklist is best used in conjunction with this article (freely available on the Web sites of PLoS Medicine at <http://www.plosmedicine.org/>, Annals of Internal Medicine at <http://www.annals.org/>, and Epidemiology at <http://www.epidem.com/>). Information on the STROBE Initiative is available at <http://www.strobe-statement.org>.

# BMJ Open

## Maternal and perinatal outcomes by planned place of birth in Australia 2000 – 2012: A linked population data study

|                                 |                                                                                                                                                                                                                                                                                                                                                                                                                                                                                                                                                                                                                                                                                                                                                                                                                                                                                                                                                                                                                                                                                                                                              |
|---------------------------------|----------------------------------------------------------------------------------------------------------------------------------------------------------------------------------------------------------------------------------------------------------------------------------------------------------------------------------------------------------------------------------------------------------------------------------------------------------------------------------------------------------------------------------------------------------------------------------------------------------------------------------------------------------------------------------------------------------------------------------------------------------------------------------------------------------------------------------------------------------------------------------------------------------------------------------------------------------------------------------------------------------------------------------------------------------------------------------------------------------------------------------------------|
| Journal:                        | <i>BMJ Open</i>                                                                                                                                                                                                                                                                                                                                                                                                                                                                                                                                                                                                                                                                                                                                                                                                                                                                                                                                                                                                                                                                                                                              |
| Manuscript ID                   | bmjopen-2019-029192.R3                                                                                                                                                                                                                                                                                                                                                                                                                                                                                                                                                                                                                                                                                                                                                                                                                                                                                                                                                                                                                                                                                                                       |
| Article Type:                   | Original research                                                                                                                                                                                                                                                                                                                                                                                                                                                                                                                                                                                                                                                                                                                                                                                                                                                                                                                                                                                                                                                                                                                            |
| Date Submitted by the Author:   | 30-Sep-2019                                                                                                                                                                                                                                                                                                                                                                                                                                                                                                                                                                                                                                                                                                                                                                                                                                                                                                                                                                                                                                                                                                                                  |
| Complete List of Authors:       | Homer, Caroline; University of Technology Sydney, Centre for Midwifery, Child and Family Health; Burnet Institute, Maternal and Child Health<br>Cheah, Seong; University of Technology Sydney Faculty of Health, Centre for Midwifery, Child and Family Health<br>Rossiter, Chris; University of Technology Sydney,<br>Dahlen, Hannah; University of Western Sydney, School of Nursing and Midwifery<br>Ellwood, David; Griffith University, School of Medicine<br>Foureur, Maralyn; UTS, Health<br>Forster, Della; La Trobe University, Judith Lumley Centre; Royal Women's Hospital, Maternity Services<br>McLachlan, HL; La Trobe University, Judith Lumley Centre; La Trobe University, School of Nursing and Midwifery<br>Oats, Jeremy; University of Melbourne Institute, Melbourne School of Population and Global Health<br>Sibbritt, David; University of Technology Sydney, Faculty of Health<br>Thornton, Charlene; Flinders University Faculty of Medicine Nursing and Health Sciences, College of Nursing and Health Sciences<br>Scarf, Vanessa; University of Technology Sydney, Centre for Midwifery, Child and Family Health |
| <b>Primary Subject Heading</b>: | Obstetrics and gynaecology                                                                                                                                                                                                                                                                                                                                                                                                                                                                                                                                                                                                                                                                                                                                                                                                                                                                                                                                                                                                                                                                                                                   |
| Secondary Subject Heading:      | Obstetrics and gynaecology, Nursing                                                                                                                                                                                                                                                                                                                                                                                                                                                                                                                                                                                                                                                                                                                                                                                                                                                                                                                                                                                                                                                                                                          |
| Keywords:                       | Maternal medicine < OBSTETRICS, EPIDEMIOLOGY, PERINATOLOGY                                                                                                                                                                                                                                                                                                                                                                                                                                                                                                                                                                                                                                                                                                                                                                                                                                                                                                                                                                                                                                                                                   |
|                                 |                                                                                                                                                                                                                                                                                                                                                                                                                                                                                                                                                                                                                                                                                                                                                                                                                                                                                                                                                                                                                                                                                                                                              |

SCHOLARONE™  
Manuscripts

1  
2  
3  
4 1 **Maternal and perinatal outcomes by planned place of birth in**  
5  
6 2 **Australia 2000 – 2012: A linked population data study**  
7  
8

9 3  
10 4 Homer, Caroline SE  
11 5 Centre for Midwifery, Child and Family Health, Faculty of Health, University of Technology  
12 6 Sydney, Sydney, Australia  
13 7 Maternal and Child Health Program, Burnet Institute, Melbourne, Australia  
14 8

15 8  
16 9 Cheah, Seong  
17 10 Centre for Midwifery, Child and Family Health, Faculty of Health, University of Technology  
18 11 Sydney, Sydney, Australia  
19 12

20 12  
21 13 Rossiter, Chris  
22 14 Centre for Midwifery, Child and Family Health, Faculty of Health, University of Technology  
23 15 Sydney, Sydney, Australia  
24 16

25 16  
26 17 Dahlen, Hannah G  
27 18 School of Nursing and Midwifery, University of Western Sydney, Sydney, Australia  
28 19

29 19  
30 20 Ellwood, David  
31 21 School of Medicine, Griffith University, and Gold Coast University Hospital, Queensland,  
32 22 Australia  
33 23

34 23  
35 24 Foureur, Maralyn  
36 25 Centre for Midwifery, Child and Family Health, Faculty of Health, University of Technology  
37 26 Sydney, Sydney, Australia  
38 27

39 27  
40 28 Forster, Della  
41 29 Judith Lumley Centre; Royal Women's Hospital, Maternity Services, La Trobe University,  
42 30 Melbourne, Australia  
43 31

44 31  
45 32 McLachlan, Helen L  
46 33 Judith Lumley Centre; La Trobe University, Melbourne, Australia  
47 34

48 34  
49 35 Oats, Jeremy  
50 36 Melbourne School of Population and Global Health, University of Melbourne, Melbourne,  
51 37 Australia  
52 38

53 38  
54 39 Sibbritt, David  
55 40 Faculty of Health, University of Technology Sydney, Sydney, Australia  
56 41

57 41  
58 42 Thornton, Charlene  
59 43 Faculty of Medicine Nursing and Health Sciences, College of Nursing and Health Sciences  
60 44 Flinders University, Adelaide, Australia

1  
2  
3 45  
4 46 Scarf, Vanessa L  
5 47 Centre for Midwifery, Child and Family Health, Faculty of Health, University of Technology  
6 48 Sydney, Sydney, Australia  
7  
8  
9 49

10 50 Corresponding author  
11 51 Professor Caroline Homer AO  
12 52 University of Technology Sydney, Australia  
13 53 T +613 8506 2454  
14 54 M +61 418 466 974  
15 55 E [caroline.homer@uts.edu.au](mailto:caroline.homer@uts.edu.au)  
16  
17 56

18  
19  
20 57  
21 58 Keywords: Maternal medicine, obstetrics, epidemiology, perinatology  
22 59

23 60 Word count - excluding title page, references, figures: 5475  
24  
25 61  
26 62



1  
2  
3 **63 ABSTRACT**  
4

5  
6 **64 Objective** – To compare perinatal and maternal outcomes for Australian women with  
7  
8 **65** uncomplicated pregnancies according to planned place of birth, that is, in hospital labour  
9  
10 **66** wards, birth centres or at home.

11  
12 **67 Design** – A population-based retrospective design, linking and analysing routinely collected  
13  
14 **68** electronic data. Analysis comprised chi-square tests and binary logistic regression for  
15  
16 **69** categorical data, yielding adjusted odds ratios. Continuous data were analysed using  
17  
18 **70** ANOVA.

19  
20 **71 Setting** – All eight Australian states and territories.

21  
22  
23 **72 Participants** – Women with uncomplicated pregnancies who gave birth between 2000 and  
24  
25 **73** 2012 to a singleton baby in cephalic presentation at between 37 and 41 completed weeks'  
26  
27 **74** gestation. Of the 1 251 420 births, 1 171 703 (93.6%) were planned in hospital labour wards,  
28  
29 **75** 71 505 (5.7%) in birth centres and 8212 (0.7%) at home.

30  
31 **76 Main outcome measures** – Mode of birth, normal labour and birth, interventions and  
32  
33 **77** procedures during labour and birth, maternal complications, admission to special care/high  
34  
35 **78** dependency or intensive care units (mother or infant) and perinatal mortality (intrapartum  
36  
37 **79** stillbirth and neonatal death).

38  
39 **80 Results** – Compared with planned hospital births, the odds of normal labour and birth were  
40  
41 **81** over twice as high in planned birth centre births (AOR 2.72; 99% CI 2.63-2.81) and nearly six  
42  
43 **82** times as high in planned home births (AOR 5.91; 99% CI 5.15-6.78). There were no  
44  
45 **83** statistically significant differences in the proportion of intrapartum stillbirths, early or late  
46  
47 **84** neonatal deaths between the three planned places of birth.

48  
49 **85 Conclusions** – This is the first Australia-wide study to examine outcomes by planned place of  
50  
51 **86** birth. For healthy women in Australia having an uncomplicated pregnancy, planned births in  
52  
53 **87** birth centres or at home are associated with positive maternal outcomes although the  
54  
55 **88** number of homebirths was small overall. There were no significant differences in the  
56  
57 **89** perinatal mortality rate, although the absolute numbers of deaths were very small and  
58  
59 **90** therefore firm conclusions cannot be drawn about perinatal mortality outcomes.  
60

## 92 ARTICLE SUMMARY

### 93 Strengths and limitations of this study

- 94 • This retrospective study reveals the first Australia-wide evidence on the relative  
95 safety of planned birth in hospital, a birth centre and at home.
- 96 • It analyses linked data on the outcomes for women with uncomplicated pregnancies  
97 and their infants in all eight Australian states and territories.
- 98 • Careful data screening eliminated most causes of obstetric complexity, resulting in  
99 three cohorts with equivalent levels of risk.
- 100 • Inconsistency between state-based datasets limited the number of confounding  
101 variables available for analysis.
- 102 • Insufficient data on changes in planned birth place prior to labour hampered  
103 identification of intrapartum transfers and analysis of the relationship between  
104 intended and actual place of birth.

### 105 Funding statement

106 This work was supported by the National Health and Medical Research Council Australia,  
107 Grant ID 1022422 (2012-2017).

### 108 Competing interest statement

109 We have read and understood *BMJ* policy on declaration of interests and declare that we  
110 have no competing interests.

### 111 Acknowledgements

112 We acknowledge and thank the data custodians in each state and territory and the data  
113 linkage units who assisted with data collection at each jurisdictional level.

### 114 Ethics approval

115 The study received initial ethical approval from the lead university's Human Research Ethics  
116 Committee (HREC) (university reference number: 2012000167) and from data custodians in  
117 each state and territory. The details are provided in a Supplementary File.

### 118 Author contribution

1  
2  
3 119 CH as the lead investigator was responsible for the overall leadership of the study including  
4  
5 120 the initial conception and design, grant application, ethical approval processes, leading the  
6  
7 121 project, drafting the manuscript and finalising the paper.  
8

9  
10 122 SC was the data analyst responsible for merging the datasets from each jurisdiction, refining  
11  
12 123 the datasets, developing the analysis codes and processes, and conducting the statistical  
13  
14 124 analysis and has provided final approval of this version.  
15

16 125 CR worked with the data analyst to support data analysis and interpretation as well as  
17  
18 126 taking a key role in supporting the drafting of the manuscript and has provided final  
19  
20 127 approval of this version.  
21

22 128 HD was involved in the initial design of the study, played a key role in developing the study  
23  
24 129 questions and data analytic processes, was involved in drafting the work and/or revising it  
25  
26 130 critically for important intellectual content and has provided final approval of this version.  
27

28  
29 131 DE was involved in the initial design of the study, played a key role in developing the study  
30  
31 132 questions and providing expert review, was involved in drafting the work and/or revising it  
32  
33 133 critically for important intellectual content and has provided final approval of this version.  
34

35 134 MF was involved in the initial design of the study, played a key role in developing the study  
36  
37 135 questions and providing expert review, was involved in drafting the work and/or revising it  
38  
39 136 critically for important intellectual content and has provided final approval of this version.  
40

41 137 DF was involved in the initial design of the study, played a key role in developing the study  
42  
43 138 questions and providing expert review, was involved in drafting the work and/or revising it  
44  
45 139 critically for important intellectual content and has provided final approval of this version.  
46

47 140 HM was involved in the initial design of the study, played a key role in developing the study  
48  
49 141 questions and providing expert review, was involved in drafting the work and/or revising it  
50  
51 142 critically for important intellectual content and has provided final approval of this version.  
52

53  
54 143 JO was involved in the initial design of the study, played a key role in developing the study  
55  
56 144 questions and providing expert review, was involved in drafting the work and/or revising it  
57  
58 145 critically for important intellectual content and has provided final approval of this version.  
59  
60

1  
2  
3 146 DS was involved in the initial design of the study, played a key role in developing the study  
4  
5 147 questions and analytic processes and providing expert statistical planning and review, was  
6  
7 148 involved in drafting the work and/or revising it critically for important intellectual content  
8  
9 149 and has provided final approval of this version.

10  
11 150 CT played a key role in developing the study questions and analytic plan, assisted with  
12  
13 151 planning the data set merging and cleaning of the data and providing expert epidemiological  
14  
15 152 review, was involved in drafting the work and/or revising it critically for important  
16  
17 153 intellectual content and has provided final approval of this version.

18  
19 154 VS was the project coordinator responsible for the ethical approval processes, took a key  
20  
21 155 role in coordinating the acquisition of the data from the different states and territories as  
22  
23 156 well as a lead role in planning and undertaking the analysis and interpretation, was involved  
24  
25 157 in drafting the work and/or revising it critically for important intellectual content and has  
26  
27 158 provided final approval of this version.

### 28 29 159 **Consent**

30  
31  
32 160 Individual consent by participants was deemed to not be required due to the population-  
33  
34 161 based de-identified form of the data released to the researchers.

### 35 36 162 **Data sharing statement**

37  
38  
39 163 The data that support the findings of this study are not available. It was a condition of the  
40  
41 164 agreement between the data linkage units and the researchers that the dataset remain  
42  
43 165 confidential. We are not permitted to make any part of the linked data available to any  
44  
45 166 party outside those named on the research team who have been granted access.

46  
47  
48 167  
49  
50  
51  
52  
53  
54  
55  
56  
57  
58  
59  
60

## 168 INTRODUCTION

169 In Australia, most births occur in hospitals (97.5% in 2015), with some variation across the  
170 eight states and territories (for example, 91% in the Australian Capital Territory to 99% in  
171 Victoria).<sup>1</sup> Women with uncomplicated pregnancies and who are planning hospital births in  
172 the public health system receive antenatal care from hospital-based midwives and doctors,  
173 sometimes within continuity of care models, and often in partnership with local general  
174 practitioners. Hospital midwives attend their labour and birth, with medical involvement as  
175 required or in line with local protocols. In the private health system (where 25% of births  
176 take place), women receive antenatal care from private obstetricians or midwives employed  
177 by obstetricians. Hospital midwives attend their labour and birth and the obstetrician  
178 attends during the labour and is usually at the birth.<sup>2,3</sup> There are some differences across  
179 Australia in the way care is provided, especially the local guidelines and the choices available  
180 to women. The availability of different models of care varies across the country.

181 While most births take place in hospital labour wards or birth suites, a small proportion  
182 (1.8% nationally) take place in midwife-run birth centres.<sup>1</sup> In Australia these birth centres  
183 are typically co-located with hospitals (similar to alongside midwifery units in other  
184 countries) although a small number of stand-alone birth centres exist.<sup>4</sup> Birth centres  
185 typically provide midwifery continuity of care to women with uncomplicated pregnancies in  
186 a home-like environment and are well integrated into the health system.

187 Less than 0.3% of Australian births take place at home, ranging from 0.1% of births in New  
188 South Wales to 0.6% in the Northern Territory.<sup>1,5</sup> Most planned home births are attended by  
189 midwives working in private practice, some of whom also attend women in birth centres  
190 and hospitals. The integration of private homebirth services varies across the country. A  
191 small number of hospitals and birth centres offer home births through the public health  
192 system.<sup>6</sup> An evaluation of the outcomes of publicly funded models providing homebirth  
193 showed that the rate of stillbirth and early neonatal mortality was low, at 1.7 per 1000  
194 births. However, the sample size did not have sufficient power to generate a conclusion  
195 about safety.<sup>7</sup>

196 We have conducted a systematic review to examine maternal and perinatal outcomes  
197 associated with planned place of birth for women with uncomplicated pregnancies in high-

1  
2  
3 198 income countries.<sup>8</sup> In this analysis of 28 studies from 13 countries, women who planned  
4  
5 199 hospital births had significantly higher rates of perineal trauma and instrumental/caesarean  
6  
7 200 birth than those who planned other birth places. Overall, there was no significant difference  
8  
9 201 in the odds of intrapartum stillbirth according to place of birth (compared with planned  
10  
11 202 hospital births, planned homebirth: OR=0.94; 95% CI: 0.76-1.17; planned birth centre  
12  
13 203 OR=0.66; 95% CI: 0.32-1.34) or in early neonatal deaths (planned home birth OR=1.00; 95%  
14  
15 204 CI: 0.78-1.27; planned birth centre 0.87; 95% CI: 0.29-2.61).

16  
17 205 Previous Australian state-based studies into place of birth have showed variation in findings.  
18  
19 206 In New South Wales (the most populous state accounting for around 30.9% of births)<sup>9</sup>,  
20  
21 207 women without pregnancy complications who planned a home or birth centre birth had  
22  
23 208 significantly higher proportions of normal birth than those planning hospital births (home  
24  
25 209 97.4% vs birth centre 86.0% vs hospital 73.9%). There was no significant difference in  
26  
27 210 neonatal mortality although the overall sample size (n= 258 161, including only 742 planned  
28  
29 211 home births), had insufficient power for these relatively rare outcomes. In South Australia  
30  
31 212 (SA) (297 192 planned hospital births and 1141 [0.38%] planned home births), another study  
32  
33 213 found lower intervention rates and equivalent perinatal death rates in home births  
34  
35 214 compared to hospital births. However, the odds of an intrapartum fetal death were  
36  
37 215 significantly higher among planned home births (two deaths in the planned home birth  
38  
39 216 group; AOR 7.42; 95% CI: 1.53–35.87). This study included some women with recognised risk  
40  
41 217 factors in the home birth group including twins.<sup>10</sup> Large-scale studies in other countries  
42  
43 218 show similar perinatal outcomes between births planned at home and in hospitals (and birth  
44  
45 219 centres where these exist) with some differences for primiparous women.<sup>11-14</sup>

46  
47 220 There is less controversy about birth centres compared with homebirth. Data from  
48  
49 221 Australian birth centres indicate lower rates of maternal morbidity,<sup>15</sup> intervention, preterm  
50  
51 222 birth and low birthweight compared with hospital births for women with similar risk  
52  
53 223 profiles.<sup>16</sup> One study identified no significant differences by birth place in perinatal  
54  
55 224 mortality<sup>16</sup> and another reported lower perinatal mortality in birth centre births, although  
56  
57 225 based on actual rather than intended birth place.<sup>17</sup> A smaller hospital-based study found no  
58  
59 226 significant difference in caesarean section rates between the birth centre and labour ward  
60  
61 227 for women with uncomplicated pregnancies.<sup>18</sup> Two other birth centre studies reported  
62  
63 228 higher rates of spontaneous vaginal birth and lower rates of adverse infant outcomes

1  
2  
3 229 (neonatal intensive care unit [NICU] admission, low birthweight) compared to hospital  
4  
5 230 births.<sup>19,20</sup>  
6  
7

8 231 The safety of place of birth continues to be questioned in Australia.<sup>21</sup> To generate evidence  
9  
10 232 to assist policy makers, health practitioners, and pregnant women and their families to  
11  
12 233 make informed decisions about place of birth, we undertook a national study combining  
13  
14 234 data from all eight Australian jurisdictions to examine the outcomes for women with  
15  
16 235 uncomplicated pregnancies related to three different birth settings. This is the first national  
17  
18 236 study on the comparative safety of different planned birth settings in Australia.  
19

### 20 237 **Aim and objectives**

21  
22 238 The study aimed to compare the perinatal and maternal outcomes for Australian women  
23  
24 239 with uncomplicated pregnancies according to planned place of birth, that is, hospital labour  
25  
26 240 wards, birth centres or at home. Outcomes investigated included normal labour and birth,  
27  
28 241 mode of birth, interventions during labour, postpartum maternal complications and  
29  
30 242 perinatal mortality and morbidity. We defined *uncomplicated pregnancy* as a singleton fetus  
31  
32 243 in cephalic presentation between 37 and 41 completed weeks' gestation and free of known  
33  
34 244 and recorded complications. Exclusions are detailed in Box 1.  
35

## 36 245 **METHODS**

### 37 38 246 **Study design**

39  
40  
41 247 The study used a population-based retrospective design, linking and analysing routinely  
42  
43 248 collected electronic data from multiple sources about births between 2000 and 2012 to  
44  
45 249 women with uncomplicated pregnancies. We compared outcomes from three cohorts  
46  
47 250 comprising women who were as comparable as possible given the available data. In  
48  
49 251 Australia, homebirth and birth centre options are mostly restricted to women who meet  
50  
51 252 specific criteria, that is, have an uncomplicated pregnancy and no relevant past medical or  
52  
53 253 obstetric history. We therefore endeavoured to ensure that the hospital cohort shared the  
54  
55 254 same characteristics, clinically if not demographically and applied the same filters on all  
56  
57 255 three cohorts to increase the similarity between groups.  
58  
59  
60



1  
2  
3 256 The study was approved by a university Human Research Ethics Committee (HREC). HRECs in  
4  
5 257 each state and territory also approved access to anonymised linked data (see  
6  
7 258 Supplementary File 1).

### 9 259 **Patient and Public Involvement**

11  
12 260 Patients and the public were not involved in the design or conduct of the study.

### 14 15 261 **Data sources**

16  
17 262 All eight Australian states and territories compile electronic perinatal datasets with items on  
18  
19 263 maternal characteristics, labour, birth, and perinatal outcomes in the immediate  
20  
21 264 postpartum period, that is, during the birth admission. However, to eliminate women with  
22  
23 265 conditions that made them fall out of the uncomplicated criteria from the sample and to  
24  
25 266 examine deaths and major morbidity requiring hospitalisation beyond the perinatal period,  
26  
27 267 we examined additional data sources on deaths and hospital admissions nine months before  
28  
29 268 and twelve months following birth. This study used linked anonymous data on all available  
30  
31 269 mothers and infants from the following sources:

- 32 270 • *Perinatal Data Collection (PDC)* – maternal and infant data on all live births and  
33  
34 271 stillbirths from 20 weeks' gestation or >400g birth weight;
- 35  
36 272 • *Admitted Patient Data Collection (APDC)* – services provided to all individuals  
37  
38 273 admitted to public and private hospitals, using the International Classification of  
39  
40 274 Diseases – Australian modifications (ICD-10-AM)<sup>22</sup> for clinical data;
- 41  
42 275 • *Registry of Births, Deaths and Marriages (RBDM)* – all registered births and deaths;
- 43  
44 276 • *Australian Bureau of Statistics (ABS)* – data on deaths including primary cause of  
45  
46 277 death (only for NSW and Queensland).

47  
48 278 It was not possible to obtain data from all sources for all states and territories for the full  
49  
50 279 study period due to differences in data collection systems. Table footnotes indicate the  
51  
52 280 scope of data for each variable. In addition, not all states and territories provided data on  
53  
54 281 maternal mortality.

### 55 56 282 **Definitions**

57  
58  
59  
60



1  
2  
3 283 The definition of *uncomplicated pregnancies* (those without medical or obstetric risk  
4  
5 284 factors) was determined a priori by the research team. For the most part, this used the  
6  
7 285 Australian College of Midwives Guidelines for Consultation and Referral<sup>23</sup> as a basis for the  
8  
9 286 description of uncomplicated pregnancies.

10  
11 287 < Insert Box 1 here >

12  
13  
14 288 *Planned place of birth* incorporates three possible locations: home, birth centre, and  
15  
16 289 hospital. *Homebirths* are instances where women intend to give birth outside a formal  
17  
18 290 health facility, usually their own home, and receive care from a registered midwife, funded  
19  
20 291 through either the public or private health system or self-funded. *Birth centres* provide a  
21  
22 292 home-like birth setting and are run by midwives. They can be located within a hospital  
23  
24 293 campus (alongside unit) or in a separate area (stand-alone unit) and require transfer to the  
25  
26 294 main hospital service for access to interventions such as epidural analgesia or caesarean  
27  
28 295 section. *Hospital births* take place in the labour ward or birth suite (terms vary across the  
29  
30 296 country) of either a public or private hospital, and women are attended by midwives,  
31  
32 297 obstetricians and/or general practitioner (GP) obstetricians.

33  
34 298 The timing of the decision about birth setting is critical within the birthplace literature.  
35  
36 299 While women choose a birth location early in their pregnancy, clinical factors may preclude  
37  
38 300 them from achieving this intention. If they develop complications, they may no longer be  
39  
40 301 eligible to give birth in a birth centre or at home. These women are excluded from  
41  
42 302 comparisons of outcome by birth setting if they transfer to hospital care prior to labour.  
43  
44 303 Ideally, researchers should identify planned place of birth at labour onset, to ensure that all  
45  
46 304 participants have a similar level of clinical complexity. All Australian data collections record  
47  
48 305 intended place of birth, but the majority did not indicate intention at labour onset.  
49  
50 306 Therefore, the current study analyses data on planned place of birth identified at an  
51  
52 307 undetermined time in the pregnancy, as close to labour as we were able to identify. The  
53  
54 308 screening process eliminated women with many of the risk factors that would have  
55  
56 309 prompted antenatal transfer from a birth centre or homebirth.

57  
58 310 Box 2 provides the definitions of the maternal and perinatal outcomes.

59 311 < Insert Box 2 here >

## 312 **Data linkage**

313 Independent data linkage units (DLU) in each state and territory matched information from  
314 the four data sources (where available), using probabilistic linkage techniques.<sup>24,25</sup> This  
315 generated de-identified health records linking information from multiple datasets about the  
316 same individuals. This process yields the best available data on maternal and infant health  
317 status. However, it is not infallible and has estimated false positive and false negative rates  
318 of 0.5% each.<sup>26</sup>

319 Cross-jurisdictional data linkage was not possible, as independent DLUs had diverging  
320 protocols for maintaining patient privacy. We therefore applied to the individual data  
321 custodians for access to the linked data, through the six DLUs (data linkage for the  
322 Australian Capital Territory and the Northern Territory is provided by NSW and SA units  
323 respectively). Data were combined on relevant variables, where comparable, into a national  
324 dataset. Box 3 provides details on the datasets. Our approach to the data linkages and  
325 combining issues are detailed elsewhere.<sup>27</sup>

326 < Insert Box 3 here >

## 327 **Data cleaning, screening and cohort selection**

328 Because the data collections were developed separately in each state and territory (except  
329 ABS collections), they had different characteristics and components. In particular, several  
330 PDC and APDC variables differed in name and type by jurisdiction. Even within the same  
331 state, some variable definitions changed over the study period, with items merged or split  
332 into multiple variables over time. The researchers scrutinised definitions to ensure accurate  
333 matching between variables with different names and attributes into a standardised  
334 dataset. The variables on mode of birth and intervention are all as defined by each state or  
335 territory.

336 Our broad request to state DLUs specified data on women with singleton pregnancies and a  
337 cephalic presentation at 37 to 41 completed weeks' gestation. Datasets arrived in different  
338 formats and met our criteria to varying extents. We then applied more specific inclusion and  
339 exclusion criteria (Box 1) to generate the sample.

## 340 **Data analysis**

341 Data were converted to SPSS Version 24, then grouped according to women's planned place  
342 of birth for intention to treat analysis. Descriptive statistics were generated and reported  
343 using percentages (or incidence per 1000 births for postpartum complications and perinatal  
344 outcomes).

345 Categorical variables were initially compared using chi-square tests. For continuous data  
346 such as maternal age and gestation week, we used univariate general linear model for  
347 analysis of variance (ANOVA) to examine the differences between the means. Odds ratios  
348 comparing each outcome by planned place of birth were calculated using logistic regression,  
349 adjusted for maternal age, maternal country of birth (Australia or elsewhere), gestational  
350 age and parity (dichotomised as primiparous vs multiparous) (adjusted odds ratio=AOR).  
351 These confounders were decided *a priori* based on what is known in the literature to affect  
352 outcomes. Percentages or proportions (events per 1000) were computed for the incidence  
353 of events at each birth setting. We present analysis stratified by parity (first baby versus  
354 other) for normal labour and birth and perinatal mortality.

355 No imputation was made to missing data. All calculations in regression and rates were  
356 computed based on non-missing data. Wherever necessary, sizes of missing data (not  
357 stated/inadequately described) on related variables were reported. The analysis reports  
358 99% confidence intervals. The statistical significance level was set at  $p < 0.01$  to have more  
359 precision due to the large sample size.

360 Ethical approval requirements prevented reporting cell sizes of less than five to maintain  
361 confidentiality and so data have been redated in the tables to ensure this requirement was  
362 met. Further details on the methods is presented elsewhere.<sup>27</sup>

## 363 **RESULTS**

### 364 **Demographic characteristics**

365 The sample comprised 1 251 420 births that occurred between 1 January 2000 and 31  
366 December 2012 to women with full-term, singleton pregnancies without complications. Of

367 these, 1 171 703 (93.6%) births were planned in hospital labour wards (referred to as  
368 'hospital' births), 71 505 (5.7%) in a birth centre and 8212 (0.7%) at home.

369 Women planning to give birth in hospital labour wards were more likely to be younger,  
370 having their first birth (primiparous), of a shorter gestation (less than 40 weeks) or non-  
371 Australian-born than those planning birth centre or home births (Table 1).

372 <Insert Table 1 here>

### 373 **Mode of birth, intervention and analgesia by planned place of birth**

374 Planned birth at home or in a birth centre was associated with normal labour and birth  
375 more often than planned hospital birth. Women planning a birth centre birth were almost  
376 three times as likely (AOR 2.72, 99% CI 2.63-2.81) and women planning a home birth were  
377 almost six times as likely (AOR 5.91, 99% CI 5.15-6.78) to have a normal birth (Table 2). The  
378 odds for primiparous and multiparous women were similar. Overall, the proportion of  
379 women having a normal labour and birth were high (79% to 95% across the groups).

380 <Insert Table 2 here>

381 Women planning hospital births were more likely to experience interventions in birth.  
382 Compared with planned hospital births, births planned in other settings had significantly  
383 lower odds of: vacuum extraction (birth centre AOR 0.42; 99% CI 0.40-0.44 and homebirth  
384 AOR 0.18; 99% CI 0.14-0.24), forceps (birth centre AOR 0.54; 99% CI 0.50-0.58 and  
385 homebirth AOR 0.21; 99% CI 0.14-0.31) and intrapartum caesarean section (birth centre  
386 AOR 0.45; 99% CI 0.43-0.48 and homebirth AOR 0.29; 99% CI 0.24-0.35). Overall, the rates of  
387 interventions in the whole cohort were low with a rate of intrapartum caesarean section of  
388 only 8%.

389 Women who planned a birth centre or home birth were significantly more likely to have an  
390 intact perineum (birth centre AOR 1.16; 99% CI 1.14-1.19 and homebirth AOR 2.07; 99% CI  
391 1.95-2.20) than those planning a hospital birth. Compared with planned hospital births, 3<sup>rd</sup>  
392 or 4<sup>th</sup> degree perineal tears were less likely in planned home births (AOR 0.53; 99% CI 0.39-  
393 0.73) and more likely in planned birth centre births (AOR 1.17; 99% CI 1.09-1.25). The odds  
394 of episiotomy were much lower in both non-hospital groups (birth centre AOR 0.37; 99% CI

1  
2  
3 395 0.36-0.39 and homebirth AOR 0.13; 99% CI 0.10-0.15) than in planned hospital births. The  
4  
5 396 odds of other interventions such as oxytocin augmentation and epidural or spinal analgesia  
6  
7 397 were lower in planned birth centre or home births (Table 3).  
8

9  
10 398 <Insert Table 3 here>  
11

### 12 399 **Maternal postpartum complications**

13  
14  
15 400 Women who planned to give birth in a birth centre were less likely to have a PPH requiring a  
16  
17 401 blood transfusion than women who planned hospital births (AOR 0.66; 99% CI 0.56-0.78).  
18  
19 402 There was no significant difference in the odds for women who planned a home birth (AOR  
20  
21 403 1.08; 99% CI 0.73-1.60). The odds for admission to an intensive care or a high dependency  
22  
23 404 unit were lower for the planned birth centre group (AOR 0.42; 99% CI 0.31-0.56) but no  
24  
25 405 different for the planned home birth group (AOR 0.41; 99% CI 0.15-1.08). However, the  
26  
27 406 absolute number of admissions is small (Table 4). There were no significant differences  
28  
29 407 between the groups in the odds of readmission to hospital within a month.

30  
31 408 <Insert Table 4 here>  
32

### 33 409 **Perinatal outcomes by planned place of birth**

34  
35  
36 410 Although the planned homebirth group had higher odds ratios for intrapartum stillbirth and  
37  
38 411 early neonatal death than the other planned places of birth, the differences were not  
39  
40 412 statistically significant. Combined data on stillbirth during labour, early and late neonatal  
41  
42 413 death indicate that indicate that perinatal death is no more likely to occur after planned  
43  
44 414 homebirth than in hospital birth (AOR 1.55; 99% CI 0.65-3.69), although the absolute  
45  
46 415 number of deaths was very small (9/8182). Similarly, there was no significant difference for  
47  
48 416 women planning a birth centre birth (AOR 0.84; 99% CI 0.60-1.19). When women were  
49  
50 417 stratified by parity, there were no significant differences between any of the groups in the  
51  
52 418 odds of perinatal mortality.

53  
54 419 Women who planned a birth centre birth were more likely to have their baby admitted to  
55  
56 420 the NICU and/or SCU for longer than 48 hours (AOR 1.24; 99% CI 1.10-1.39) than women  
57  
58 421 who planned hospital births. This trend was not seen in planned home births (AOR 0.63;  
59  
60

1  
2  
3 422 99% CI 0.39-1.01). There were no significant differences between the three groups in the  
4  
5 423 odds of readmission of the baby to hospital within 28 days (Table 5).  
6  
7

8 424 <Insert Table 5 here>  
9

## 10 425 **DISCUSSION**

11  
12  
13 426 This study, the first in Australia, has examined maternal and perinatal outcomes nationally  
14  
15 427 by planned place of birth including all eight states and territories. Our study has  
16  
17 428 demonstrated results consistent with several international studies of planned place of  
18  
19 429 birth.<sup>11,12,14</sup> Normal births were more likely for women who planned birth in birth centres or  
20  
21 430 at home than in a hospital. Women who planned to give birth at home were slightly older  
22  
23 431 than women planning hospital or birth centre births, but despite this, had consistently lower  
24  
25 432 rates of intervention.

26  
27 433 The unadjusted perinatal mortality ratio for planned hospital births was 0.8 per 1000 live  
28  
29 434 births compared with 0.4 in planned birth centre births and 1.1 in planned home births,  
30  
31 435 although the absolute risks were very small with low numbers of deaths overall. These  
32  
33 436 differences by place of birth were neither statistically significant for all women nor for  
34  
35 437 cohorts stratified by parity. However, the differences are more marked in primiparous  
36  
37 438 women (0.8 per 1000 in planned hospital vs 1.7 per 1000 in planned homebirth) than  
38  
39 439 multiparous women (0.7 per 1000 in planned hospital vs 0.8 per 1000 in planned  
40  
41 440 homebirth). Given the small number of deaths in the planned homebirth group (n=9) this  
42  
43 441 may be a chance finding over a long period of time (13 years). However, it is similar to the  
44  
45 442 findings of the Birthplace in England study, which found a statistically significant higher odds  
46  
47 443 of a composite outcome combining perinatal mortality and selected early neonatal  
48  
49 444 morbidities among primiparous women planning home birth.<sup>11</sup> This highlights the need to  
50  
51 445 explain the risks to women in absolute terms, as this is likely to be more helpful in assisting  
52  
53 446 decision-making.

54  
55 447 There were two negative findings in relation to birth centre outcomes, firstly, a significantly  
56  
57 448 higher rate of severe perineal trauma (AOR 1.17; 99% CI 1.09-1.25) compared with planned  
58  
59 449 hospital births. Another Australian study<sup>16</sup> and one in New Zealand also found higher rates  
60  
450 of perineal trauma in birth centres.<sup>28</sup> However, other research found no significant

1  
2  
3 451 differences in perineal outcomes, for example in studies in Norway,<sup>29,30</sup> Denmark,<sup>31</sup>  
4  
5 452 Australia<sup>32</sup> or England.<sup>33</sup> The higher rate of severe perineal trauma may be related to the use  
6  
7 453 of birth stools, more common in Australian birth centres but less frequently in hospitals or  
8  
9 454 at home. Birth stools have been linked to higher rates of severe perineal trauma compared  
10  
11 455 with other birth positions or waterbirth.<sup>34</sup> The higher rates of trauma could also be due to  
12  
13 456 better case ascertainment or lower rates of episiotomy.

14  
15 457 The study also found higher rates of infant admission to NICU/SCN for greater than 48 hours  
16  
17 458 (AOR 1.24; 99% CI 1.10-1.39) among planned birth centre births. This is different from other  
18  
19 459 research, which either found higher rates associated with planned hospital births<sup>16,28</sup> or else  
20  
21 460 no statistically significant differences in NICU admission rates from birth centres and  
22  
23 461 hospital births.<sup>29,31,35</sup> The admissions to the NICU or SCN in the current study are low in  
24  
25 462 absolute terms (1 per 100 for birth centre births) but higher than planned hospital births.  
26  
27 463 This requires ongoing examination to determine possible reasons and ways to reduce the  
28  
29 464 rate.

### 30 465 **Strengths and limitations**

31  
32  
33 466 This study is the first to comprehensively examine maternal and perinatal outcomes from  
34  
35 467 three birth settings across Australia. It used a population-based sample consisting of women  
36  
37 468 with uncomplicated pregnancies. The large sample size was sufficient to detect differences  
38  
39 469 between the three groups, although the numbers of homebirth nationally, even over this  
40  
41 470 time period, were comparatively small (i.e. 8212 only 0.7% of the total sample).

42  
43 471 The context of homebirth in Australia means there are still low numbers of women choosing  
44  
45 472 homebirth and hence small numbers in this population. Private practising midwives do not  
46  
47 473 have access to professional indemnity insurance which means the option for women is  
48  
49 474 limited although still available in some parts of the country. Some private practising  
50  
51 475 midwives in some states have visiting rights to hospitals but this is not universal leading to a  
52  
53 476 lack of potential lack of integration. The publicly funded home birth models are relatively  
54  
55 477 few (no more than 20 services across the country) and cater for small numbers of women.  
56  
57 478 The policy and professional context has not been highly supportive of homebirth which has  
58  
59 479 made scaling up of public services difficult.  
60



1  
2  
3 480 Women with uncomplicated pregnancies were defined consistently across all three cohorts  
4  
5 481 in the dataset. However, merging linked data from multiple jurisdictions created several  
6  
7 482 challenges and potential shortcomings, including missing responses, inconsistent variable  
8  
9 483 definitions and limited data from some states.<sup>27</sup> For example, Queensland's data collection  
10  
11 484 only covered 2007-2012, resulting in under-representation: 9.6% of the combined sample,  
12  
13 485 compared with 20.4% of Australian births in 2012.<sup>36</sup> The linked data sets also could not  
14  
15 486 account for women who may have moved to another state or territory in the follow-up time  
16  
17 487 frame. State and territory-based data collections have inconsistent variables on other  
18  
19 488 potential demographic factors such as maternal education, socioeconomic status or body  
20  
21 489 mass index, limiting the variables available for controlling the analysis. Further, the small cell  
22  
23 490 sizes generated meant that we were not able to report findings under the terms of ethics  
24  
25 491 agreements with data custodians.

26 492 Although we eliminated unintended home births among women intending hospital or birth  
27  
28 493 centre births (births before arrival), the home birth data do not always record whether or  
29  
30 494 not a qualified health professional attended. Within the constraints of the data available, we  
31  
32 495 have only included births attended by a health professional. Moreover, different states  
33  
34 496 recorded birthplace intentions at different times. Although this means that intended birth  
35  
36 497 place is not always recorded at onset of labour, the scrupulous process of data cleaning and  
37  
38 498 categorising eliminated most women with risk factors which would have rendered them  
39  
40 499 ineligible for birth centre or home births. Thus, the recorded birthplace intention was as  
41  
42 500 close as possible to that at labour onset. However, there is a possibility that some planned  
43  
44 501 birth centre/home births were erroneously classified as planned hospital births.

45 502 Some data items were collected inconsistently across the jurisdictions, for example, transfer  
46  
47 503 from home to hospital after the onset of labour. This was either because the data item did  
48  
49 504 not exist or because it only recorded 'transfer', which could have been at any time during  
50  
51 505 pregnancy. Therefore, we were unable to report on intrapartum transfer rates.

52  
53 506 Inconsistencies in the data from different jurisdictions also affected the data analysis. The  
54  
55 507 regression analysis incorporated very few potential confounders, limited to those for which  
56  
57 508 consistent data were available nation-wide (i.e. maternal age, gestational age, parity and  
58  
59 509 whether born in Australia or not). Socio-economic status is also inconsistently collected  
60



1  
2  
3 510 across the country, as is maternal BMI and education, so we were unable to adjust for these  
4  
5 511 factors.  
6  
7

8 512 It is possible that there remain some residual *unobservable differences in the groups*. It is  
9  
10 513 possible that women planning to give birth in a birth centre or at home are different from  
11 514 those planning a hospital birth in a number of ways, including their motivation, attitudes to  
12 515 intervention and approach to birth. These are not able to be measured but may impact on  
13 516 the findings in relation to interventions and outcomes.  
14  
15  
16

## 17 517 **CONCLUSION**

18  
19  
20 518 This study provides evidence on the safety of births planned in hospital, birth centre and at  
21 519 home across all states and territories in Australia by comparing cohorts of women with  
22 520 uncomplicated pregnancies. Inconsistencies between state-based datasets as described  
23 521 limited the number of variables available for analysis. However, for healthy women with  
24 522 uncomplicated pregnancies, planned birth centre births resulted in high rates of normal  
25 523 labour and birth, low rates of most maternal complications, and comparable perinatal  
26 524 mortality outcomes. Women planning home birth also had similarly positive maternal  
27 525 outcomes with no statistically significant differences in the rate of perinatal mortality or  
28 526 NICU admission. In absolute terms, the numbers of deaths were small, although the rate of  
29 527 perinatal mortality was higher among primiparous women who planned homebirths than  
30 528 their multiparous counterparts.  
31  
32  
33  
34  
35  
36  
37  
38  
39  
40

41 529  
42  
43  
44  
45  
46  
47  
48  
49  
50  
51  
52  
53  
54  
55  
56  
57  
58  
59  
60

530 **Box 1: Exclusion criteria**

Women were excluded if the baby was:

- Born before 37 and after 41 completed weeks' gestation;
- Born before arrival for a planned birth at hospital or birth centre;
- Diagnosed antenatally with a congenital abnormality (all ICD-10-AM Q codes)

Women were also excluded if they had:

- Received no antenatal care;
- A previous caesarean section;
- A breech or non-vertex presentation;
- Labour induced for any reason;
- An elective caesarean section (pre-labour);
- Pre-existing (essential) and/or pregnancy-related hypertension;
- Pre-existing or gestational diabetes;
- Antepartum haemorrhage or any other relevant pregnancy complications
- ICD-10-AM Diagnosis
  - O10 Pre-existing hypertension complicating pregnancy, childbirth and the puerperium
  - O11 Pre-eclampsia superimposed on chronic hypertension
  - O13 Gestational [pregnancy-induced] hypertension
  - O14 Pre-eclampsia
  - O15 Eclampsia
  - O24 Diabetes mellitus in pregnancy
  - O30 Multiple gestation
  - O31.2 Continuing pregnancy after intrauterine death of one fetus or more
  - O36.4 Maternal care for intrauterine death
  - O42 Premature rupture of membranes
  - O46 Antepartum haemorrhage
  - O75.5 Delayed delivery after artificial rupture of membranes
  - O75.7 Vaginal delivery following previous caesarean section
  - P95 Fetal death of unspecified cause

531

532 **Box 2: Maternal and perinatal outcomes****Maternal outcomes**

*Normal labour and birth:* defined as spontaneous labour, cephalic presentation, without epidural, spinal or general anaesthesia, forceps, vacuum extraction, episiotomy or caesarean section.

*Mode of birth:* caesarean section, forceps birth, vacuum extraction, and normal vaginal birth (non-instrumental).

*Procedures during labour and birth:* episiotomy, epidural or spinal analgesia, oxytocin augmentation.

*Perineal status:* severe perineal trauma (3<sup>rd</sup> or 4<sup>th</sup> degree tear)

*Postpartum complications:* postpartum haemorrhage (PPH) requiring a transfusion, admission to intensive care or high dependency unit for more than 48 hours and hospital readmission within 28 days.

**Perinatal outcomes:**

*Perinatal mortality:* intrapartum stillbirth, early neonatal death (0-7 days), late neonatal death (8-28 days).

*Perinatal complications:* Admission to special care or neonatal intensive care unit (NICU) for more than 48 hours and readmission to hospital within 28 days.

533

534

535

**Box 3: Proportion of births included in sample, by state and territory**

| State or Territory                                     | NSW       | QLD       | VIC       | SA        | WA        | TAS       | ACT       | NT        | Total     |
|--------------------------------------------------------|-----------|-----------|-----------|-----------|-----------|-----------|-----------|-----------|-----------|
| Years of data provided                                 | 2000-2012 | 2007-2012 | 2000-2012 | 2000-2012 | 2000-2012 | 2005-2012 | 2000-2012 | 2000-2012 |           |
| Number of births which met the criteria for this study | 507 017   | 114 245   | 370 356   | 69 356    | 130 848   | 19 915    | 23 484    | 16 199    | 1 251 420 |
| Proportion of total study sample                       | 40.5%     | 9.1%      | 29.6%     | 5.5%      | 10.5%     | 1.6%      | 1.9%      | 1.3%      | 100%      |

Key to the states and territories: NSW - New South Wales; Qld - Queensland, VIC – Victoria; SA – South Australia; WA – Western Australia; TAS – Tasmania; ACT – Australian Capital Territory; NT – Northern Territory

Table 1: Demographic characteristics by planned place of birth

|                                         | Hospital                     | Birth Centre             | Home                   |
|-----------------------------------------|------------------------------|--------------------------|------------------------|
| <b>All women</b>                        | <b>1 171 703<br/>(93.6%)</b> | <b>71 505<br/>(5.7%)</b> | <b>8212<br/>(0.7%)</b> |
| <b>Maternal age (years) - mean (sd)</b> | 29.0 (5.6)                   | 29.8 (5.3)               | 31.8 (5.0)             |
| <b>Maternal age (years)</b>             |                              |                          |                        |
| <20                                     | 61 451 (5.2%)                | 2044 (2.9%)              | 71 (0.9%)              |
| 20-24                                   | 200 386 (17.1%)              | 10 116 (14.1%)           | 548 (6.7%)             |
| 25-29                                   | 348 785 (29.8%)              | 21 579 (30.2%)           | 2047 (24.9%)           |
| 30-34                                   | 365 022 (31.2%)              | 23 949 (33.5%)           | 3058 (37.2%)           |
| 35-39                                   | 167 803 (14.3%)              | 11 931 (16.7%)           | 1997 (24.3%)           |
| ≥40                                     | 28 177 (2.4%)                | 1886 (2.6%)              | 474 (5.8%)             |
| Missing                                 | 79 (0.0%)                    | 0 (0.0%)                 | 17 (0.2%)              |
| <b>Previous pregnancies (≥20weeks)</b>  |                              |                          |                        |
| 0                                       | 494 019 (42.2%)              | 28 891 (40.4%)           | 2295 (27.9%)           |
| 1                                       | 376 047 (32.1%)              | 25 079 (35.1%)           | 2745 (33.4%)           |
| 2                                       | 174 873 (14.9%)              | 11 364 (15.9%)           | 1688 (20.6%)           |
| ≥3                                      | 126 111 (10.8%)              | 6153 (8.6%)              | 1456 (17.7%)           |
| Not stated                              | 653 (0.1%)                   | 18 (0.0%)                | 28 (0.3%)              |
| <b>Gestation* - mean (sd)</b>           | 39.5 (1.0)                   | 39.6 (1.0)               | 39.8 (1.0)             |
| <b>Gestation*</b>                       |                              |                          |                        |
| 37                                      | 54 825 (4.7%)                | 2403 (3.4%)              | 209 (2.5%)             |
| 38                                      | 155 764 (13.3%)              | 7470 (10.4%)             | 724 (8.8%)             |
| 39                                      | 323 179 (27.6%)              | 18 278 (25.6%)           | 1666 (20.3%)           |
| 40                                      | 481 665 (41.1%)              | 29 289 (41.0%)           | 3779 (46.0%)           |
| 41                                      | 156 270 (13.3%)              | 14 065 (19.7%)           | 1834 (22.3%)           |

| <b>Maternal country of birth</b>  |                 |                |              |
|-----------------------------------|-----------------|----------------|--------------|
| Australia                         | 889 550 (75.9%) | 56 201 (78.6%) | 6822 (83.1%) |
| Others                            | 276 001 (23.6%) | 15 105 (21.1%) | 1188 (14.5%) |
| Inadequately described/not stated | 6152 (0.5%)     | 199 (0.3%)     | 202 (2.5%)   |

\*Gestation is in completed weeks

Note: Chi-square tests on categorical data within each sub-heading between birth settings yielded statistically significant differences with  $p < 0.001$  in all categories with no missing or not stated data. GLM revealed significant differences at  $p < 0.0001$  between means in all pairwise comparisons.

Percentages may not total exactly 100% due to rounding.

**Table 2: Normal labour and birth<sup>†</sup> by planned place of birth and parity**

| Planned place of birth                | No. events – normal labour and birth <sup>†</sup> | Total number of births | Incidence of events (%) | Unadjusted OR    | Adjusted OR <sup>Æ</sup> |
|---------------------------------------|---------------------------------------------------|------------------------|-------------------------|------------------|--------------------------|
| <b>All women</b>                      | 991 534                                           | 1 250 721              | 79.3                    |                  |                          |
| Hospital                              | 919 974                                           | 1 171 050              | 78.6                    | 1                | 1                        |
| Birth Centre                          | 63 773                                            | 71 487                 | 89.2                    | 2.26 (2.19-2.33) | 2.72 (2.63-2.81)         |
| Home                                  | 7787                                              | 8184                   | 95.1                    | 5.35 (4.69-6.11) | 5.91 (5.15-6.78)         |
| <b>Primiparous women<sup>^^</sup></b> | 322 640                                           | 525 205                | 61.4                    |                  |                          |
| Hospital                              | 298 243                                           | 494 019                | 60.4                    | 1                | 1                        |
| Birth Centre                          | 22 401                                            | 28 891                 | 77.5                    | 2.27 (2.18-2.35) | 2.60 (2.50-2.70)         |
| Home                                  | 1996                                              | 2295                   | 87.0                    | 4.38 (3.73-5.14) | 5.99 (5.09-7.04)         |
| <b>Multiparous women<sup>^^</sup></b> | 668 894                                           | 725 516                | 92.2                    |                  |                          |
| Hospital                              | 621 731                                           | 677 031                | 91.8                    | 1                | 1                        |
| Birth Centre                          | 41 372                                            | 42 596                 | 97.1                    | 3.01 (2.79-3.24) | 3.27 (3.03-3.53)         |
| Home                                  | 5791                                              | 5889                   | 98.3                    | 5.26 (4.04-6.83) | 5.86 (4.50-7.62)         |

<sup>Æ</sup> Logistic regression adjusted for maternal age, country of birth, gestational age and parity at 99% CI.

<sup>†</sup> Normal labour and birth – spontaneous labour, no epidural or spinal, general anaesthesia, forceps, vacuum extraction, episiotomy or caesarean section.

<sup>^^</sup> Parity refers to previous pregnancies >20 weeks and is dichotomised.

Cases with missing data were not included in rates or regression calculations

**Table 3: Mode of birth, intervention rates and perineal outcomes by planned place of birth**

| Intervention and planned place of birth        | Number of events | No of births | Incidence of events (%) | Unadjusted OR    | Adjusted OR <sup>AE</sup> |
|------------------------------------------------|------------------|--------------|-------------------------|------------------|---------------------------|
| <b>Normal vaginal birth</b>                    | 992 118          | 1 251 420    | 79.3                    |                  |                           |
| Hospital                                       | 920 514          | 1 171 703    | 78.6                    | 1                | 1                         |
| Birth Centre                                   | 63 790           | 71 505       | 89.2                    | 2.26 (2.19-2.33) | 2.72 (2.63-2.81)          |
| Home                                           | 7814             | 8212         | 95.2                    | 5.36 (4.69-6.12) | 5.91 (5.15-6.78)          |
| <b>Vacuum extraction</b>                       | 88 586           | 1 251 420    | 7.1                     |                  |                           |
| Hospital                                       | 85 975           | 1 171 703    | 7.3                     | 1                | 1                         |
| Birth Centre                                   | 2503             | 71 505       | 3.5                     | 0.44 (0.42-0.47) | 0.42 (0.40-0.44)          |
| Home                                           | 108              | 8212         | 1.3                     | 0.19 (0.15-0.24) | 0.18 (0.14-0.24)          |
| <b>Forceps birth</b>                           | 56 332           | 1 251 420    | 4.5                     |                  |                           |
| Hospital                                       | 54 451           | 1 171 703    | 4.6                     | 1                | 1                         |
| Birth Centre                                   | 1820             | 71 505       | 2.5                     | 0.54 (0.50-0.57) | 0.54 (0.50-0.58)          |
| Home                                           | 61               | 8212         | 0.7                     | 0.15 (0.11-0.21) | 0.21 (0.14-0.31)          |
| <b>Intrapartum caesarean section</b>           | 94 303           | 1 251 420    | 7.5                     |                  |                           |
| Hospital                                       | 91 238           | 1 171 703    | 7.8                     | 1                | 1                         |
| Birth Centre                                   | 2871             | 71 505       | 4.0                     | 0.50 (0.47-0.52) | 0.45 (0.43-0.48)          |
| Home                                           | 194              | 8212         | 2.4                     | 0.29 (0.24-0.35) | 0.29 (0.24-0.35)          |
| <b>Mode of birth not stated</b>                | 20 081           | 1 251 420    | 1.6                     |                  |                           |
| Hospital                                       | 19 525           | 1 171 703    | 1.7                     | 1                | 1                         |
| Birth Centre                                   | 521              | 71 505       | 0.7                     | 0.43 (0.39-0.49) | 0.41 (0.36-0.46)          |
| Home                                           | 35               | 8212         | 0.4                     | 0.25 (0.16-0.39) | 0.26 (0.17-0.41)          |
| <b>Oxytocin augmentation</b>                   | 199 302          | 1 251 420    | 15.9                    |                  |                           |
| Hospital                                       | 193 229          | 1 171 703    | 16.5                    | 1                | 1                         |
| Birth Centre                                   | 5790             | 71 505       | 8.1                     | 0.45 (0.43-0.46) | 0.41 (0.40-0.43)          |
| Home                                           | 283              | 8212         | 3.4                     | 0.18 (0.15-0.21) | 0.19 (0.16-0.22)          |
| <b>Epidural or spinal analgesia for labour</b> | 166 746          | 1 251 420    | 13.3                    |                  |                           |
| Hospital                                       | 161 796          | 1 171 703    | 13.8                    | 1                | 1                         |
| Birth Centre                                   | 4675             | 71 505       | 6.5                     | 0.44 (0.42-0.45) | 0.41 (0.39-0.43)          |
| Home                                           | 275              | 8212         | 3.3                     | 0.22 (0.18-0.25) | 0.22 (0.19-0.26)          |



|                                                                |         |           |      |                  |                  |
|----------------------------------------------------------------|---------|-----------|------|------------------|------------------|
| <b>Intact perineum*</b>                                        | 308 232 | 1 157 117 | 26.6 |                  |                  |
| Hospital                                                       | 283 887 | 1 080 465 | 26.3 | 1                | 1                |
| Birth Centre                                                   | 20 562  | 68 634    | 30.0 | 1.20(1.17-1.23)  | 1.39(1.36-1.43)  |
| Home                                                           | 3783    | 8018      | 47.2 | 2.51(2.37-2.66)  | 2.72(2.56-2.90)  |
| <b>Episiotomy*</b>                                             | 193 171 | 1 157 117 | 16.7 |                  |                  |
| Hospital                                                       | 187 276 | 1 080 465 | 17.3 | 1                | 1                |
| Birth Centre                                                   | 5688    | 68 634    | 8.3  | 0.43 (0.42-0.45) | 0.37 (0.36-0.39) |
| Home                                                           | 207     | 8018      | 2.6  | 0.13 (0.11-0.15) | 0.13 (0.10-0.15) |
| <b>3<sup>rd</sup> or 4<sup>th</sup> degree perineal trauma</b> | 23 165  | 1 157 117 | 2.0  |                  |                  |
| Hospital *¥                                                    | 21 454  | 1 080 465 | 2.0  | 1                | 1                |
| Birth Centre                                                   | 1641    | 68 634    | 2.4  | 1.21 (1.13-1.29) | 1.17 (1.09-1.25) |
| Home                                                           | 70      | 8018      | 0.9  | 0.43 (0.32-0.59) | 0.53 (0.36-0.73) |

<sup>Æ</sup> Logistic regression adjusted for maternal age, country of birth, gestational age and parity at 99% CI.

\* Denominator = excluded caesarean section

¥ Included episiotomy extensions

Cases with missing data were not included in rates or regression calculations.

Variables on mode of birth and intervention are as defined by each state or territory.

**Table 4: Maternal postpartum complications by planned place of birth**

| Complication and planned place of birth                                                | No of events | No of births | Incidence of events/1000 births | Unadjusted OR    | Adjusted OR <sup>Æ</sup> |
|----------------------------------------------------------------------------------------|--------------|--------------|---------------------------------|------------------|--------------------------|
| <b>Postpartum haemorrhage with blood transfusion</b>                                   | 6518         | 1 251 420    | 5.2                             |                  |                          |
| Hospital                                                                               | 6230         | 1 171 703    | 5.3                             | 1                | 1                        |
| Birth Centre                                                                           | 244          | 71 505       | 3.4                             | 0.64 (0.54-0.76) | 0.66 (0.56-0.78)         |
| Home                                                                                   | 44           | 8212         | 5.4                             | 1.01 (0.68-1.49) | 1.08 (0.73-1.60)         |
| <b>Admission at least 48 hrs to intensive care or high dependency unit<sup>∞</sup></b> | 2602         | 707 221*     | 3.7                             |                  |                          |
| Hospital                                                                               | 2521         | 654 960      | 3.8                             | 1                | 1                        |
| Birth Centre                                                                           | 74           | 47 266       | 1.6                             | 0.41 (0.30-0.55) | 0.42 (0.31-0.56)         |
| Home                                                                                   | 7            | 4995         | 1.4                             | 0.36 (0.14-0.96) | 0.41 (0.15-1.08)         |
| <b>Readmission to hospital (within 28 days)</b>                                        | 917          | 864 865**    | 1.1                             |                  |                          |
| Hospital                                                                               | 843          | 804 667      | 1.0                             | 1                | 1                        |
| Birth Centre                                                                           | 68           | 54 522       | 1.2                             | 1.19 (0.86-1.65) | 1.18 (0.85-1.64)         |
| Home                                                                                   | 6            | 5676         | 1.1                             | 1.01 (0.35-2.90) | 1.08 (0.38-3.12)         |

<sup>Æ</sup> Logistic regression adjusted for maternal age, country of birth, gestational age and parity at 99% CI.

\* Excluded QLD, VIC, NT, ACT, TAS

<sup>∞</sup> Intensive care and high dependency units provided additional care – these were defined by each state and territory

\*\* Excluded VIC, NT

Cases with missing data were not included in rates or regression calculations

Table 5: Perinatal outcomes by planned place of birth and parity<sup>^^</sup>

| Planned place of birth                                         | No. of events | No. of births | Incidence of events/1000 births | Unadjusted OR    | Adjusted OR <sup>Æ</sup> |
|----------------------------------------------------------------|---------------|---------------|---------------------------------|------------------|--------------------------|
| <b>Stillbirth during labour, early and late neonatal death</b> | 921           | 1 251 420     | 0.7                             |                  |                          |
| Hospital                                                       | 880           | 1 171 050     | 0.8                             | 1                | 1                        |
| Birth Centre                                                   | 32            | 71 505        | 0.4                             | 0.60 (0.37-0.95) | 0.64 (0.40-1.02)         |
| Home                                                           | 9             | 8212          | 1.1                             | 1.46 (0.62-3.47) | 1.55 (0.65-3.69)         |
| <b>Primiparous women</b>                                       | 425           | 525 205       | 0.8                             |                  |                          |
| Hospital                                                       | 406           | 494 019       | 0.8                             | 1                | 1                        |
| Birth Centre                                                   | 15            | 28 891        | 0.5                             | 0.63 (0.32-1.24) | 0.65 (0.33-1.27)         |
| Home                                                           | na            | 2295          | na                              | na               | 2.12(0.58-7.82)          |
| <b>Multiparous women</b>                                       | 496           | 725 516       | 0.7                             |                  |                          |
| Hospital                                                       | 474           | 677 031       | 0.7                             | 1                | 1                        |
| Birth Centre                                                   | 17            | 42 596        | 0.4                             | 0.57 (0.30-1.08) | 0.65 (0.34-1.23)         |
| Home                                                           | na            | 5889          | na                              | na               | 1.29 (0.40-4.14)         |
| <b>Stillbirth during labour</b>                                | 399           | 1 251 420     | 0.32                            |                  |                          |
| Hospital                                                       | 378           | 1 171 703     | 0.32                            | 1                | 1                        |
| Birth Centre                                                   | 17            | 71 505        | 0.24                            | 0.74 (0.39-1.40) | 0.78 (0.41-1.48)         |
| Home                                                           | na            | 8212          | na                              | na               | 1.56 (0.42-5.71)         |
| <b>Early neonatal death<sup>1</sup></b>                        | 240           | 881 064*      | 0.27                            |                  |                          |
| Hospital                                                       | 221           | 819 963       | 0.27                            | 1                | 1                        |
| Birth Centre                                                   | 14            | 55 312        | 0.25                            | 0.84 (0.46-1.91) | 0.94 (0.46-1.92)         |
| Home                                                           | na            | 5789          | na                              | na               | 3.18 (0.98-10.30)        |
| <b>Late neonatal death<sup>2</sup></b>                         | 95            | 881 064*      | 0.11                            |                  |                          |
| Hospital                                                       | 94            | 819 963       | 0.11                            | 1                | 1                        |
| Birth Centre                                                   | na            | 55 312        | na                              | na               | na                       |
| Home                                                           | 0             | 5789          | 0.0                             | na               | na                       |
| <b>Admission to SCN and/or NICU &gt;48hrs<sup>3</sup></b>      | 7500          | 881 064*      | 8.51                            |                  |                          |
| Hospital                                                       | 6908          | 819 963       | 8.42                            | 1                | 1                        |
| Birth Centre                                                   | 562           | 55 312        | 10.16                           | 1.21 (1.08-1.35) | 1.24 (1.10-1.39)         |

|                                                           |        |           |       |                  |                  |
|-----------------------------------------------------------|--------|-----------|-------|------------------|------------------|
| Home                                                      | 30     | 5789      | 5.18  | 0.61 (0.38-0.98) | 0.63 (0.39-1.01) |
| <b>Readmission to hospital within 28 days<sup>4</sup></b> | 37 569 | 1 251 420 | 30.02 |                  |                  |
| Hospital                                                  | 35 413 | 1 171 703 | 30.22 | 1                | 1                |
| Birth Centre                                              | 1967   | 71 505    | 27.51 | 0.91 (0.85-0.96) | 0.95 (0.90-1.01) |
| Home                                                      | 189    | 8212      | 23.02 | 0.76 (0.63-0.91) | 0.83 (0.68-1.00) |

<sup>^</sup>Denominator excluded missing parity information. The denominator in the first section of this table has 699 records with missing data for parity. Because this part of the data analysis was stratified by parity, we excluded the women whose parity data were unavailable.

na: cell size <5 so unable to report data or calculate incidence or OR

<sup>1</sup> Early neonatal death: death of a liveborn infant occurring within 7 completed days from the time of birth.

<sup>2</sup> Late neonatal death: death of a liveborn infant occurring after 7 completed days but before 29 completed days.

<sup>3</sup> NICU and SCN were combined due to complexities in the data to separate them out for all states and territories, except the Northern Territory where there was only SCN available and for South Australia where only NICU was available.

<sup>4</sup> For home births, this is defined as admission to hospital following birth within 28 days.

\* Excluded VIC.

<sup>^E</sup> Logistic regression was undertaken with adjustments occurring for maternal age, country of birth, gestational age, and parity at 99% CI. Any case with missing data was excluded from the regression.

<sup>^^</sup> Parity refers to previous pregnancies >20 weeks.

## REFERENCES

1. Australian Institute of Health and Welfare. Australia's mothers and babies 2015 – in brief. Perinatal statistics series no. 33. Cat no. PER 91. Canberra: AIHW; 2017.
2. Homer C. Models of maternity care: evidence for midwifery continuity of care. *Medical Journal of Australia* 2016; **205**: 370-4.
3. Donnelly N, Butler-Henderson K, Chapman M, Sullivan E. The development of a classification system for maternity models of care. *Health Information Management Journal* 2016; **45**(2): 64-70.
4. Monk A, Tracy S, Foureur M, Barclay L. Australian primary maternity units: past, present and future. *Women Birth* 2013; **26**(3): 213-8.
5. ABS. Australian Demographic Statistics. 2018. <http://www.abs.gov.au/ausstats/abs@.nsf/mf/3101.0> (accessed 13 June 2018).
6. Catling-Paull C, Foureur M, Homer C, on behalf of the members of the Publicly-funded Homebirth Consortium. Publicly-funded homebirth models in Australia. *Women & Birth* 2012; **25**: 152-8.
7. Catling-Paull C, Coddington R, Foureur M, Homer CSE. Publicly-funded homebirth in Australia: A review of maternal and neonatal outcomes for the last 6 years. *MJA* 2013; **198**(11): 616-20.
8. Scarf V, Rossiter C, Vedam S, et al. Maternal and perinatal outcomes by planned place of birth among women with low-risk pregnancies in high-income countries: A systematic review and meta-analysis. *Midwifery* 2018; **62**: 240-55.
9. ABS. Births, Australia 2016. 2017. <http://www.abs.gov.au/ausstats/abs@.nsf/Latestproducts/3301.0Main%20Features32016?opendocument&tabname=Summary&prodno=3301.0&issue=2016&num=&view=> (accessed 13 June 2018).
10. Kennare R, Keirse M, Tucker G, Chan A. Planned home and hospital births in South Australia, 1991-2006: differences in outcomes. *Medical Journal of Australia* 2010; **192**: 76-80.
11. Birthplace in England Collaborative Group. Perinatal and maternal outcomes by planned place of birth for healthy women with low risk pregnancies: the Birthplace in England national prospective cohort study. *BMJ* 2011; **343**:d7400 doi: 10.1136/bmj.d7400.
12. de Jonge A, van der Goes B, Ravelli A, et al. Perinatal mortality and morbidity in a nationwide cohort of 529 688 low-risk planned home and hospital births. *BJOG* 2009; **116**(9): 1177-84.
13. de Jonge A, Geerts C, van der Goes B, Mol B, Buitendijk S, Nijhuis J. Perinatal mortality and morbidity up to 28 days after birth among 743 070 low-risk planned home and hospital births: a cohort study based on three merged national perinatal databases. *Bjog* 2015; **122**(5): 720-8.
14. Hutton E, Cappelletti A, Reitsma A, et al. Outcomes associated with planned place of birth among women with low-risk pregnancies. *Cmaj* 2016; **188**(5): E80-90.
15. Laws P, Xu F, Welsh A, Tracy S, Sullivan E. Maternal morbidity of women receiving birth center care in New South Wales: a matched-pair analysis using linked health data. *Birth* 2014; **41**(3): 268-75.
16. Laws P, Tracy S, Sullivan E. Perinatal outcomes of women intending to give birth in birth centers in Australia. *Birth* 2010; **37**(1): 28-36.
17. Tracy S, Dahlen H, Laws P, Wang Y, Tracy M, Sullivan E. Birth centres in Australia. A national population-based study of perinatal mortality associated with giving birth in a birth centre. *Birth* 2007; **34**(3): 194-201.
18. Homer CSE, Davis GK, Petocz P, Barclay L, Matha D, Chapman MG. The obstetric outcomes of low risk women: birth centre versus labour ward. *Australian Journal of Advanced Nursing* 2000; **18**(1): 8-12.

19. Monk A, Tracy M, Foureur M, Grigg C, Tracy S. Evaluating Midwifery Units (EMU): a prospective cohort study of freestanding midwifery units in New South Wales, Australia. *BMJ Open* 2014; **4**(10).
20. Ryan M, Roberts C. A retrospective cohort study comparing the clinical outcomes of a birth centre and labour ward in the same hospital. *Australian Midwifery* 2005; **18**(2): 17-21.
21. RANZCOG. College Statement: Homebirths. Melbourne: Royal Australian & New Zealand College of Obstetricians & Gynaecologists; 2017.
22. Australian Consortium for Classification Development. ICD-10-AM/ACHI/ACS. 2018. <https://www.accd.net.au/icd10.aspx> (accessed 4 June 2018).
23. Australian College of Midwives. National Midwifery Guidelines for Consultation and Referral - 3rd Edition Issue 2. Canberra: Australian College of Midwives; 2015.
24. Harron K, Wade A, Gilbert R, Muller-Pebody B, Goldstein H. Evaluating bias due to data linkage error in electronic healthcare records. *BMC Med Res Methodol* 2014; **14**: 36.
25. Meray N, Reitsma J, Ravelli A, Bonsel G. Probabilistic record linkage is a valid and transparent tool to combine databases without a patient identification number. *J Clin Epidemiol* 2007; **60**(9): 883-91.
26. Centre for Health Record Linkage. Quality assurance. 2018. <http://www.cherel.org.au/quality-assurance> (accessed 21 May 2018).
27. Cheah S, Scarf V, Rossiter C, Thornton C, Homer C. Juggling complexity: Undertaking the first national linked data research on perinatal and maternal outcomes in Australia. *Journal of Biomedical Informatics* 2019; **93**: 103152.
28. Davis D, Baddock S, Pairman S, et al. Planned Place of Birth in New Zealand: Does it Affect Mode of Birth and Intervention Rates Among Low-Risk Women? *Birth: Issues in Perinatal Care* 2011; **38**(2): 111-9 9p.
29. Bernitz S, Rolland R, Blix E, et al. Is the operative delivery rate in low-risk women dependent on the level of birth care? A randomised controlled trial. *BJOG: An International Journal of Obstetrics and Gynaecology* 2011: 1357-64.
30. Eide BI, Nilsen AB, Rasmussen S. Births in two different delivery units in the same clinic--a prospective study of healthy primiparous women. *BMC Pregnancy & Childbirth* 2009; **9**: 25.
31. Overgaard C, Moller AM, Fenger-Gron F, et al. Freestanding midwifery unit versus obstetric unit: a matched cohort study of outcomes in low-risk women South Australian group of newborn samples. *BMJ Open* 2011.
32. Homer CS, Thornton C, Scarf VL, et al. Birthplace in New South Wales, Australia: an analysis of perinatal outcomes using routinely collected data. *BMC Pregnancy & Childbirth* 2014; **14**: 206.
33. Birthplace in England Collaborative Group. Perinatal and maternal outcomes by planned place of birth for healthy women with low risk pregnancies: the Birthplace in England national prospective cohort study. *BMJ* 2011.
34. Dahlen H, Dowling H, Tracy M, Schmied V, Tracy S. Maternal and perinatal outcomes amongst low risk women giving birth in water compared to six birth positions on land. A descriptive cross sectional study in a birth centre over 12 years. *Midwifery* 2013; **29**(7): 759-64.
35. Byrne JP, Crowther CA, Moss JR. A randomised controlled trial comparing birthing centre care with delivery suite care in Adelaide, Australia. *ANZJOG* 2000; **40**(3): 268-74.
36. Hilder L, Zhichao Z, Parker M, Jahan S, Chambers G. Australia's mothers and babies 2012 (Perinatal statistics series no. 30. Cat. no. PER 69). Canberra: AIHW; 2014.

1  
2  
3  
4  
5  
6  
7  
8  
9  
10  
11  
12  
13  
14  
15  
16  
17  
18  
19  
20  
21  
22  
23  
24  
25  
26  
27  
28  
29  
30  
31  
32  
33  
34  
35  
36  
37  
38  
39  
40  
41  
42  
43  
44  
45  
46

For peer review only

**SUPPLEMENTARY FILE 1**

**Ethics approval**

The study received initial ethical approval from the lead university's Human Research Ethics Committee (HREC) – University of Technology Sydney, Australia (university reference number: 2012000167). Each state and territory also provided ethical approval.

| <b>State or territory</b>    | <b>Name of the ethics committee(s)</b>                                                                                      | <b>Number/ID of the approval</b> |
|------------------------------|-----------------------------------------------------------------------------------------------------------------------------|----------------------------------|
| Australian Capital Territory | ACT Health HREC                                                                                                             | ETH 3.14.061                     |
| New South Wales              | NSW Population and Health Services HREC                                                                                     | HREC/14/CIPHS/15                 |
| Northern Territory           | Department of Health of the Northern Territory and the Menzies School of Health Research HREC                               | HREC 2014-2247                   |
| Queensland                   | Qld Health Office of the HREC                                                                                               | HREC/14/QGC/175                  |
| South Australia              | South Australian Health HREC                                                                                                | HREC/14/SAH/117                  |
| Tasmania                     | Tasmania Network HREC                                                                                                       | Ref No: H0015023                 |
| Victoria                     | Department of Health and Human Services – Consultative Council on Obstetric and Paediatric Mortality and Morbidity (CCOPMM) | Ref: 14/12                       |
| Western Australia            | Government of Western Australia, Department of Health HREC                                                                  | HREC 2014/57                     |



STROBE Statement—Checklist of items that should be included in reports of *cohort studies*

|                              | Item No | Recommendation                                                                                                                                                                                    | Page no       |
|------------------------------|---------|---------------------------------------------------------------------------------------------------------------------------------------------------------------------------------------------------|---------------|
| <b>Title and abstract</b>    | 1       | (a) Indicate the study's design with a commonly used term in the title or the abstract                                                                                                            | 1             |
|                              |         | (b) Provide in the abstract an informative and balanced summary of what was done and what was found                                                                                               | 1             |
| <b>Introduction</b>          |         |                                                                                                                                                                                                   |               |
| Background/rationale         | 2       | Explain the scientific background and rationale for the investigation being reported                                                                                                              | 6             |
| Objectives                   | 3       | State specific objectives, including any prespecified hypotheses                                                                                                                                  | 8             |
| <b>Methods</b>               |         |                                                                                                                                                                                                   |               |
| Study design                 | 4       | Present key elements of study design early in the paper                                                                                                                                           | 8             |
| Setting                      | 5       | Describe the setting, locations, and relevant dates, including periods of recruitment, exposure, follow-up, and data collection                                                                   | 8-9           |
| Participants                 | 6       | (a) Give the eligibility criteria, and the sources and methods of selection of participants. Describe methods of follow-up                                                                        | 8-9           |
|                              |         | (b) For matched studies, give matching criteria and number of exposed and unexposed                                                                                                               | NA            |
| Variables                    | 7       | Clearly define all outcomes, exposures, predictors, potential confounders, and effect modifiers. Give diagnostic criteria, if applicable                                                          | 9-10          |
| Data sources/<br>measurement | 8*      | For each variable of interest, give sources of data and details of methods of assessment (measurement). Describe comparability of assessment methods if there is more than one group              | 10-11         |
| Bias                         | 9       | Describe any efforts to address potential sources of bias                                                                                                                                         | 10-11         |
| Study size                   | 10      | Explain how the study size was arrived at                                                                                                                                                         |               |
| Quantitative<br>variables    | 11      | Explain how quantitative variables were handled in the analyses. If applicable, describe which groupings were chosen and why                                                                      | 11-12         |
| Statistical methods          | 12      | (a) Describe all statistical methods, including those used to control for confounding                                                                                                             | 11-12         |
|                              |         | (b) Describe any methods used to examine subgroups and interactions                                                                                                                               | 11-12         |
|                              |         | (c) Explain how missing data were addressed                                                                                                                                                       | 12            |
|                              |         | (d) If applicable, explain how loss to follow-up was addressed                                                                                                                                    | NA            |
|                              |         | (e) Describe any sensitivity analyses                                                                                                                                                             | NA            |
| <b>Results</b>               |         |                                                                                                                                                                                                   |               |
| Participants                 | 13*     | (a) Report numbers of individuals at each stage of study—eg numbers potentially eligible, examined for eligibility, confirmed eligible, included in the study, completing follow-up, and analysed | 12<br>Table 1 |
|                              |         | (b) Give reasons for non-participation at each stage                                                                                                                                              | 12            |
|                              |         | (c) Consider use of a flow diagram                                                                                                                                                                | Table 1       |
| Descriptive data             | 14*     | (a) Give characteristics of study participants (eg demographic, clinical, social) and information on exposures and potential confounders                                                          | 12            |
|                              |         | (b) Indicate number of participants with missing data for each variable of interest                                                                                                               | In each table |
|                              |         | (c) Summarise follow-up time (eg, average and total amount)                                                                                                                                       | NA            |

|                          |     |                                                                                                                                                                                                              |                      |
|--------------------------|-----|--------------------------------------------------------------------------------------------------------------------------------------------------------------------------------------------------------------|----------------------|
| Outcome data             | 15* | Report numbers of outcome events or summary measures over time                                                                                                                                               | 12-14                |
| Main results             | 16  | (a) Give unadjusted estimates and, if applicable, confounder-adjusted estimates and their precision (eg, 95% confidence interval). Make clear which confounders were adjusted for and why they were included | 12-14<br>Plus tables |
|                          |     | (b) Report category boundaries when continuous variables were categorized                                                                                                                                    | Tables               |
|                          |     | (c) If relevant, consider translating estimates of relative risk into absolute risk for a meaningful time period                                                                                             | NA                   |
| Other analyses           | 17  | Report other analyses done—eg analyses of subgroups and interactions, and sensitivity analyses                                                                                                               | NA                   |
| <b>Discussion</b>        |     |                                                                                                                                                                                                              |                      |
| Key results              | 18  | Summarise key results with reference to study objectives                                                                                                                                                     | 14-15                |
| Limitations              | 19  | Discuss limitations of the study, taking into account sources of potential bias or imprecision. Discuss both direction and magnitude of any potential bias                                                   | 16                   |
| Interpretation           | 20  | Give a cautious overall interpretation of results considering objectives, limitations, multiplicity of analyses, results from similar studies, and other relevant evidence                                   | 16-17                |
| Generalisability         | 21  | Discuss the generalisability (external validity) of the study results                                                                                                                                        | 15-17                |
| <b>Other information</b> |     |                                                                                                                                                                                                              |                      |
| Funding                  | 22  | Give the source of funding and the role of the funders for the present study and, if applicable, for the original study on which the present article is based                                                | 2                    |

\*Give information separately for exposed and unexposed groups.

**Note:** An Explanation and Elaboration article discusses each checklist item and gives methodological background and published examples of transparent reporting. The STROBE checklist is best used in conjunction with this article (freely available on the Web sites of PLoS Medicine at <http://www.plosmedicine.org/>, Annals of Internal Medicine at <http://www.annals.org/>, and Epidemiology at <http://www.epidem.com/>). Information on the STROBE Initiative is available at <http://www.strobe-statement.org>.
