# Supplementary material for: Maternal and perinatal outcomes by planned place of birth in Australia 2000 – 2012: a linked population data study
Source: PubMed Central journal article supplement — BMJ Open. 2019 Oct 29;9(10):e029192. doi: 10.1136/bmjopen-2019-029192 (PMC6830673; doi:10.1136/bmjopen-2019-029192), 2019-10-29
Supplement: bmjopen-2019-029192supp001.pdf [file bmjopen-2019-029192supp001.pdf]

**SUPPLEMENTARY FILE 1****Ethics approval**

The study received initial ethical approval from the lead university's Human Research Ethics Committee (HREC) – University of Technology Sydney, Australia (university reference number: 2012000167). Each state and territory also provided ethical approval.

| <b>State or territory</b>    | <b>Name of the ethics committee(s)</b>                                                                                      | <b>Number/ID of the approval</b> |
|------------------------------|-----------------------------------------------------------------------------------------------------------------------------|----------------------------------|
| Australian Capital Territory | ACT Health HREC                                                                                                             | ETH 3.14.061                     |
| New South Wales              | NSW Population and Health Services HREC                                                                                     | HREC/14/CIPHS/15                 |
| Northern Territory           | Department of Health of the Northern Territory and the Menzies School of Health Research HREC                               | HREC 2014-2247                   |
| Queensland                   | Qld Health Office of the HREC                                                                                               | HREC/14/QGC/175                  |
| South Australia              | South Australian Health HREC                                                                                                | HREC/14/SAH/117                  |
| Tasmania                     | Tasmania Network HREC                                                                                                       | Ref No: H0015023                 |
| Victoria                     | Department of Health and Human Services – Consultative Council on Obstetric and Paediatric Mortality and Morbidity (CCOPMM) | Ref: 14/12                       |
| Western Australia            | Government of Western Australia, Department of Health HREC                                                                  | HREC 2014/57                     |
